# Supplementary material for: The utility of a type 2 diabetes polygenic score in addition to clinical variables for prediction of type 2 diabetes incidence in birth, youth and adult cohorts in an Indigenous study population
Source: PubMed Central journal article supplement (PMC10036431; doi:10.1007/s00125-023-05870-2), 2023-03-02
Supplement: 125_2023_5870_MOESM1_ESM.pdf [file 125_2023_5870_MOESM1_ESM.pdf]

## **Supplementary Appendix**

Supplement to: Wedekind LE, Mahajan A, Hsueh W-C, et al. The utility of a type 2 diabetes polygenic score in addition to clinical variables for prediction of T2D incidence in adult, youth, and birth cohorts in an Indigenous study population.

## Table of contents

|                                                                                                                                                                                                                             |           |
|-----------------------------------------------------------------------------------------------------------------------------------------------------------------------------------------------------------------------------|-----------|
| <b>Supplementary methods</b> .....                                                                                                                                                                                          | <b>4</b>  |
| Method S1. Genotypic data. ....                                                                                                                                                                                             | 4         |
| Method S2. Construction of type 2 diabetes polygenic scores. ....                                                                                                                                                           | 5         |
| <b>Supplementary figures</b> .....                                                                                                                                                                                          | <b>6</b>  |
| Figure S1. Calibration plots for models of clinical variables and the type 2 diabetes PS for birth, youth, and adult cohorts. ....                                                                                          | 6         |
| Figure S2. Cumulative incidence of T2D by decile of the DIAMANTE 2022 multi-ancestry composite PS, in adult cohort.....                                                                                                     | 7         |
| Figure S3. Cumulative incidence of T2D by decile of the population-specific variant PS, in adult cohort. ....                                                                                                               | 8         |
| Figure S4. Plot of predicted cumulative incidence of T2D by scaled DIAMANTE 2022 multi-ethnic composite PS and various percentiles of clinical linear predictor, in adult cohort. ....                                      | 9         |
| Figure S5. Plot of predicted cumulative incidence of T2D by scaled population-specific variant PS and various percentiles of clinical linear predictor, in adult cohort. ....                                               | 10        |
| Figure S6. Net benefit of predictive models with or without PS for T2D prediction for DIAMANTE 2022 multi-ethnic composite PS over 10-year follow-up time, in adult cohort. ....                                            | 11        |
| Figure S7. Net benefit of predictive models with or without PS for T2D prediction for population-specific variant PS, in adult cohort. ....                                                                                 | 12        |
| Figure S8. Cumulative incidence of T2D over specified years of follow-up, stratified by decile of linear predictor of clinical variables. ....                                                                              | 13        |
| <b>Supplementary tables</b> .....                                                                                                                                                                                           | <b>14</b> |
| Table S1. Summary of continuous and binary traits in adult, youth, and birth cohorts. ....                                                                                                                                  | 14        |
| Table S2. Summary of continuous and binary traits in adult, youth, and birth cohorts, for cases versus non-cases. ....                                                                                                      | 15        |
| Table S3. SNPs included in the construction of the AGEN 2020 <sup>7</sup> PS. ....                                                                                                                                          | 16        |
| Table S4. Summary statistics for SNPs included in the construction of the DIAGRAM 2018 <sup>8</sup> PS.....                                                                                                                 | 21        |
| Table S5. SNPs included in the PSs derived from various ancestry-specific GWAS meta-analyses in DIAMANTE 2022 <sup>9</sup> (including the population-specific weight PS). ....                                              | 28        |
| Table S6. SNPs included in the population-specific variant PS. ....                                                                                                                                                         | 38        |
| Table S7. Results of survival, area under the ROC curve (AUC), and net reclassification improvement (NRI) analyses for the adult cohort with DIAGRAM 2018 T2D PS <sup>a</sup> , with the inclusion of lipids traits. ....   | 57        |
| Table S8. Results of survival, area under the ROC curve (AUC), and net reclassification improvement (NRI) analyses for adult and youth cohorts with DIAGRAM 2018 T2D PS, without inclusion of HbA <sub>1c</sub> .....       | 58        |
| Table S9. Cox regressions comparing associations of the DIAGRAM 2018 PS (N=293 SNPs) with T2D incidence after adjustment for the first 10 genetic principal components <sup>a</sup> : birth, youth, and adult cohorts. .... | 59        |
| Table S10. Comparing analyses of PS constructions in birth, youth, and adult cohorts. ....                                                                                                                                  | 60        |
| Table S11. Cox regressions, AUC and NRI analyses of the multi-ancestry composite DIAMANTE 2022 PS: adult cohort (N=2333). ....                                                                                              | 61        |
| Table S12. Cox regressions, AUC and NRI analyses of the population-specific variant PS: adult cohort (N=2333). ....                                                                                                         | 61        |

|                                                                                                  |           |
|--------------------------------------------------------------------------------------------------|-----------|
| <b>Table S13. AUC analyses for additional genotypes with DIAGRAM 2018 PS: adult cohort .....</b> | <b>62</b> |
| <b>Supplementary appendix references .....</b>                                                   | <b>63</b> |

## Supplementary methods

### Method S1. Genotypic data.

A longitudinal study of diabetes was conducted in an Indigenous study population from the Southwestern US. 7701 of the participants in the longitudinal study had genotypes available: genotypes were generated for previous genome-wide association studies using a custom Axiom genome-wide array (Affymetrix, Santa Clara, CA) that was designed to capture common variation in members of this community (minor allele frequency i.e.,  $MAF \geq 0.05$ , or  $\geq 0.01$  for coding variants), using methods described previously.<sup>1</sup> The custom array identified tag single-nucleotide polymorphisms (SNPs) for approximately 5 million variants; 515,692 SNPs were directly genotyped. This genotyping captured approximately 92% of variation with  $MAF \geq 0.05$  and 50% of variation with  $MAF$  1-5%.

Missing and ungenotyped variants were imputed with whole genome sequence data for 266 members of the study population as a reference panel using Impute 2.<sup>2</sup> Variants were excluded if imputation quality score  $< 0.5$  or  $MAF < 0.01$ . A total of 4,589,902 variants were imputed.

## **Method S2. Construction of type 2 diabetes polygenic scores.**

Method S2a. Cross-validating population-specific weights for the DIAMANTE 2022 PS.

To estimate population-specific weights for variants constituting the T2D PSs, we used cross-validation to reduce overfitting associated with deriving the weights in the same dataset in which they are applied. We used a 10-fold cross-validation procedure to estimate weights for the 287 DIAMANTE 2022 multi-ancestry composite PS's variants in this Indigenous population. The 7701 participants in the GWAS were randomly divided into 10 equally sized groups, and the weights for each group were calculated by analyzing the association of each variant with T2D in the other 9 groups. Associations were analyzed with prevalent T2D at last examination (2571 cases in 7659 with data available) with adjustment for age, sex, birth year and the first 5 genetic principal components (to account for population structure). Analyses were conducted with a linear mixed model, which was fit with SOLAR,<sup>3</sup> that accounted for pairwise relationships among individuals, estimated with BEAGLE as previously described.<sup>1,4</sup> T2D was analyzed as a continuous (0,1) variable, and the regression coefficient was converted to an odds ratio by the method of Haggstrom.<sup>5</sup> The population-specific weights, derived from the average logarithm of the odds ratio across all 10 sub-analyses, are shown in Table S5, along with weights for each ethnicity derived from the DIAMANTE 2022 meta-analyses.

Method S2b. Selecting variants for population-specific variant PS.

We also derived a population-specific variant T2D PS by selecting 287 T2D-associated variants from the 515,692 variants typed in the T2D GWAS in the Indigenous study population. For computational efficiency and to reduce overfitting with assessments over a large number of variants, we used 2-fold cross-validation in this situation, since lower values of  $k$  in  $k$ -fold cross-validation can help reduce overfitting when a large number of features is assessed.<sup>6</sup> The GWAS participants were randomly divided into two equally-sized groups, and a GWAS of T2D was conducted in each group (the “discovery” group) to select the variants and weights used to construct the PS for the other group (the “target” group). To reduce the influence of linkage disequilibrium among variants in close physical proximity, the genome was divided into bins of ~200kb using the  $k$ -means procedure (PROC FASTCLUS in SAS), resulting in 25,763 bins across the genome. Within each discovery group, the variant with the lowest  $p$ -value for association with T2D was taken within each bin, and the 287 variants with the lowest  $p$ -values representing each bin were taken for constructing the PS for the target group. We chose 287 variants for constructing this population-specific variant score to obtain a PS with number of variants and information comparable to those from the DIAMANTE 2022 and DIAGRAM 2018 PSs. To avoid loss of statistical power associated with further splitting of the sample, we did not attempt to optimize the number of variants; we also did not attempt further validation in additional samples. Thus, generalizability of this score is not certain. The variants selected for this population-specific variant PS are shown in Table S6.

**Supplementary figures**

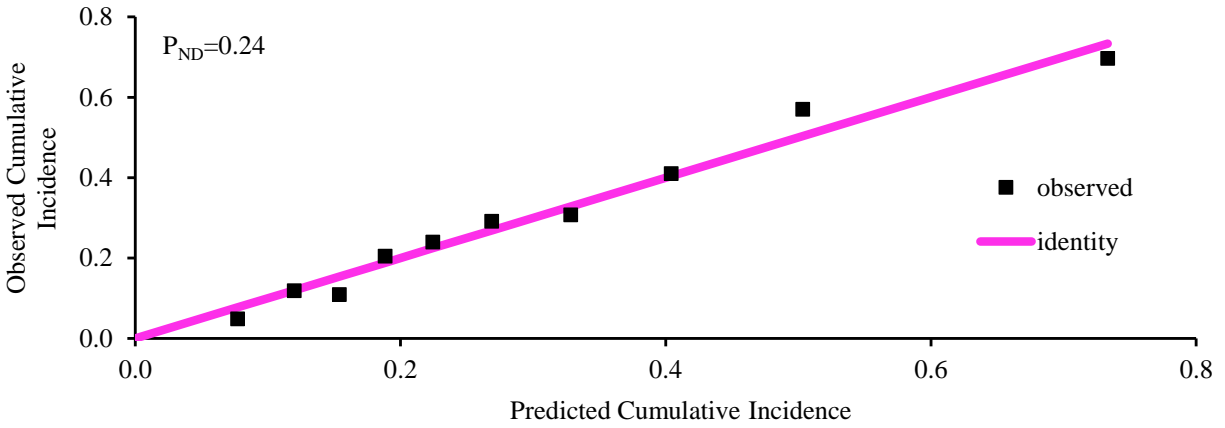

Figure S1a. Calibration plot for adult cohort with model of age, sex, parental diabetes, BMI, FPG, HbA1c, and PS.

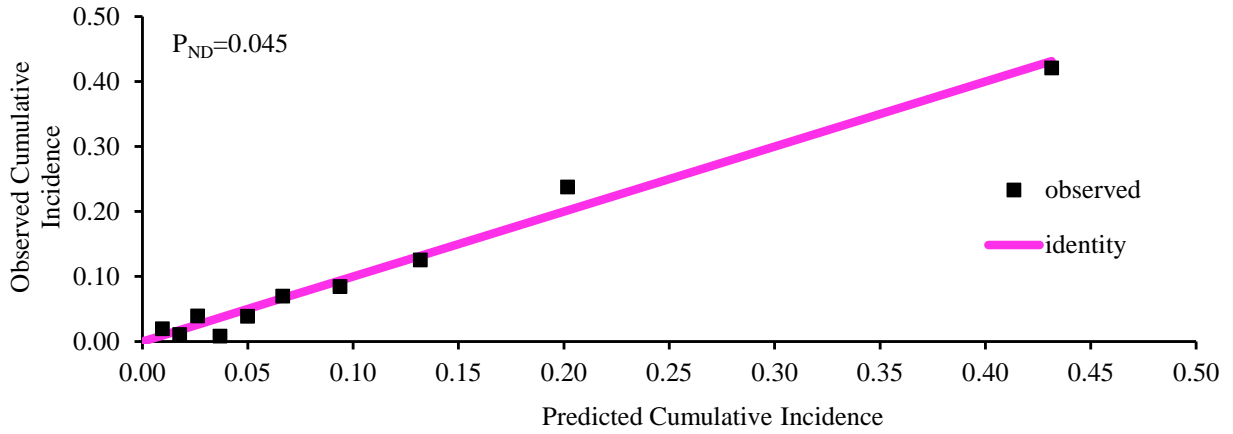

Figure S1b. Calibration plot for adult cohort with model of age, sex, parental diabetes, BMI z, FPG, HbA1c, and PS.

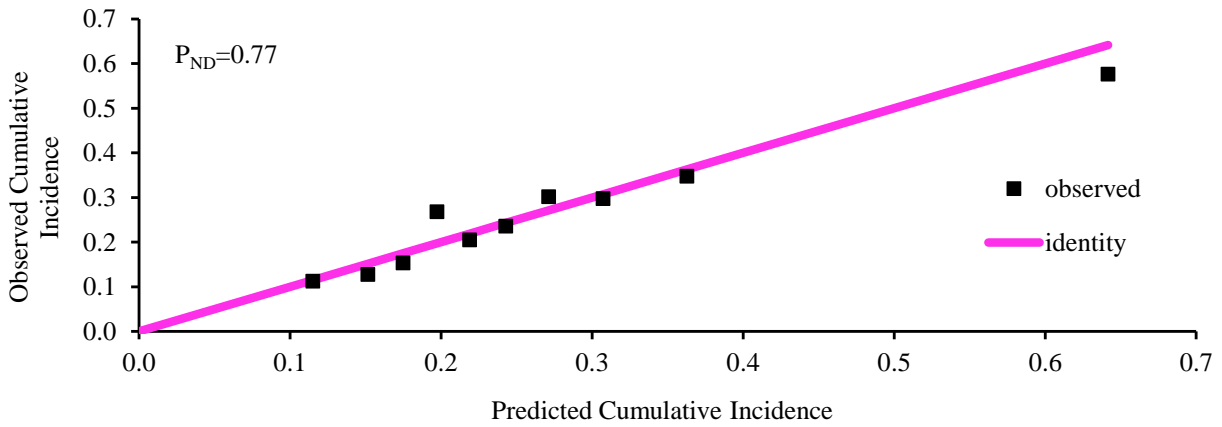

Figure S1c. Calibration plot for adult cohort with model of sex, parental diabetes, birth weight, and PS.

**Figure S1. Calibration plots for models of clinical variables and the type 2 diabetes PS for birth, youth, and adult cohorts.  $P_{ND}$  is p-value from Nam-D'Agostino goodness of fit test**

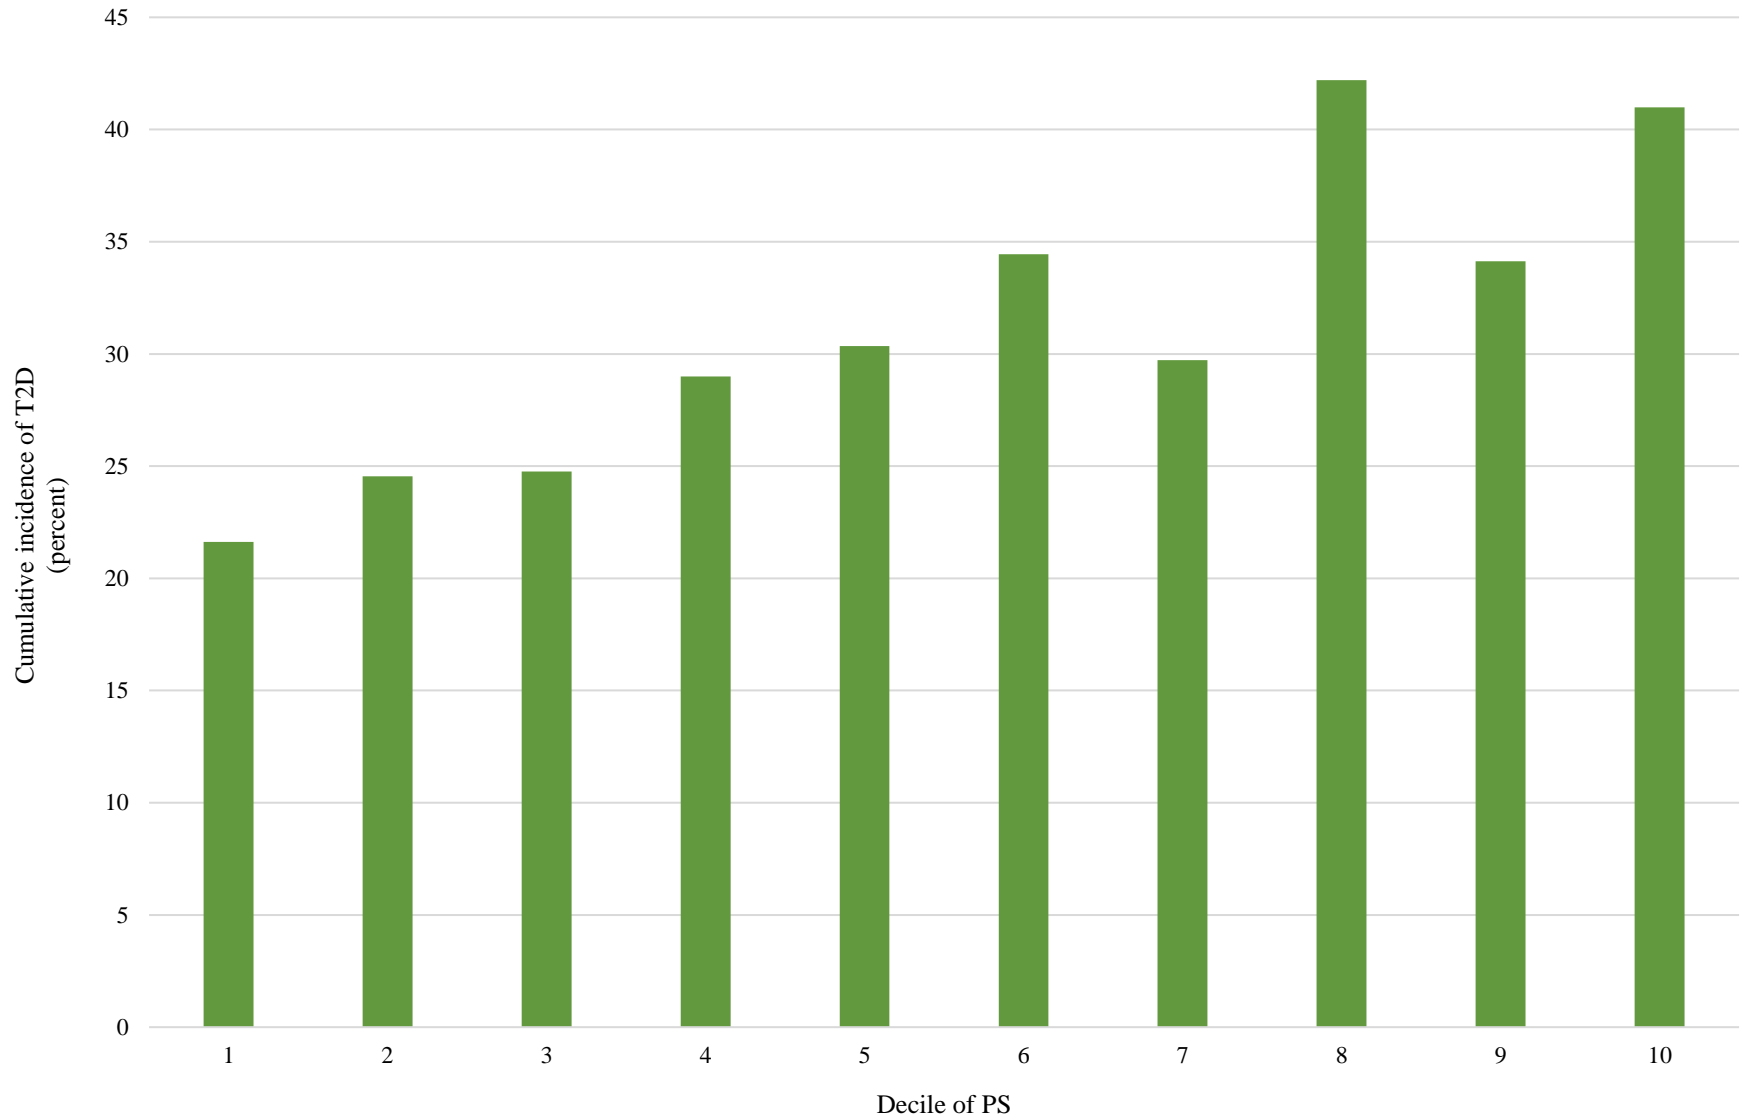

**Figure S2. Cumulative incidence of T2D by decile of the DIAMANTE 2022 multi-ancestry composite PS, in adult cohort.** At 10 years follow-up, 504 individuals had developed T2D and 635 remained at risk.

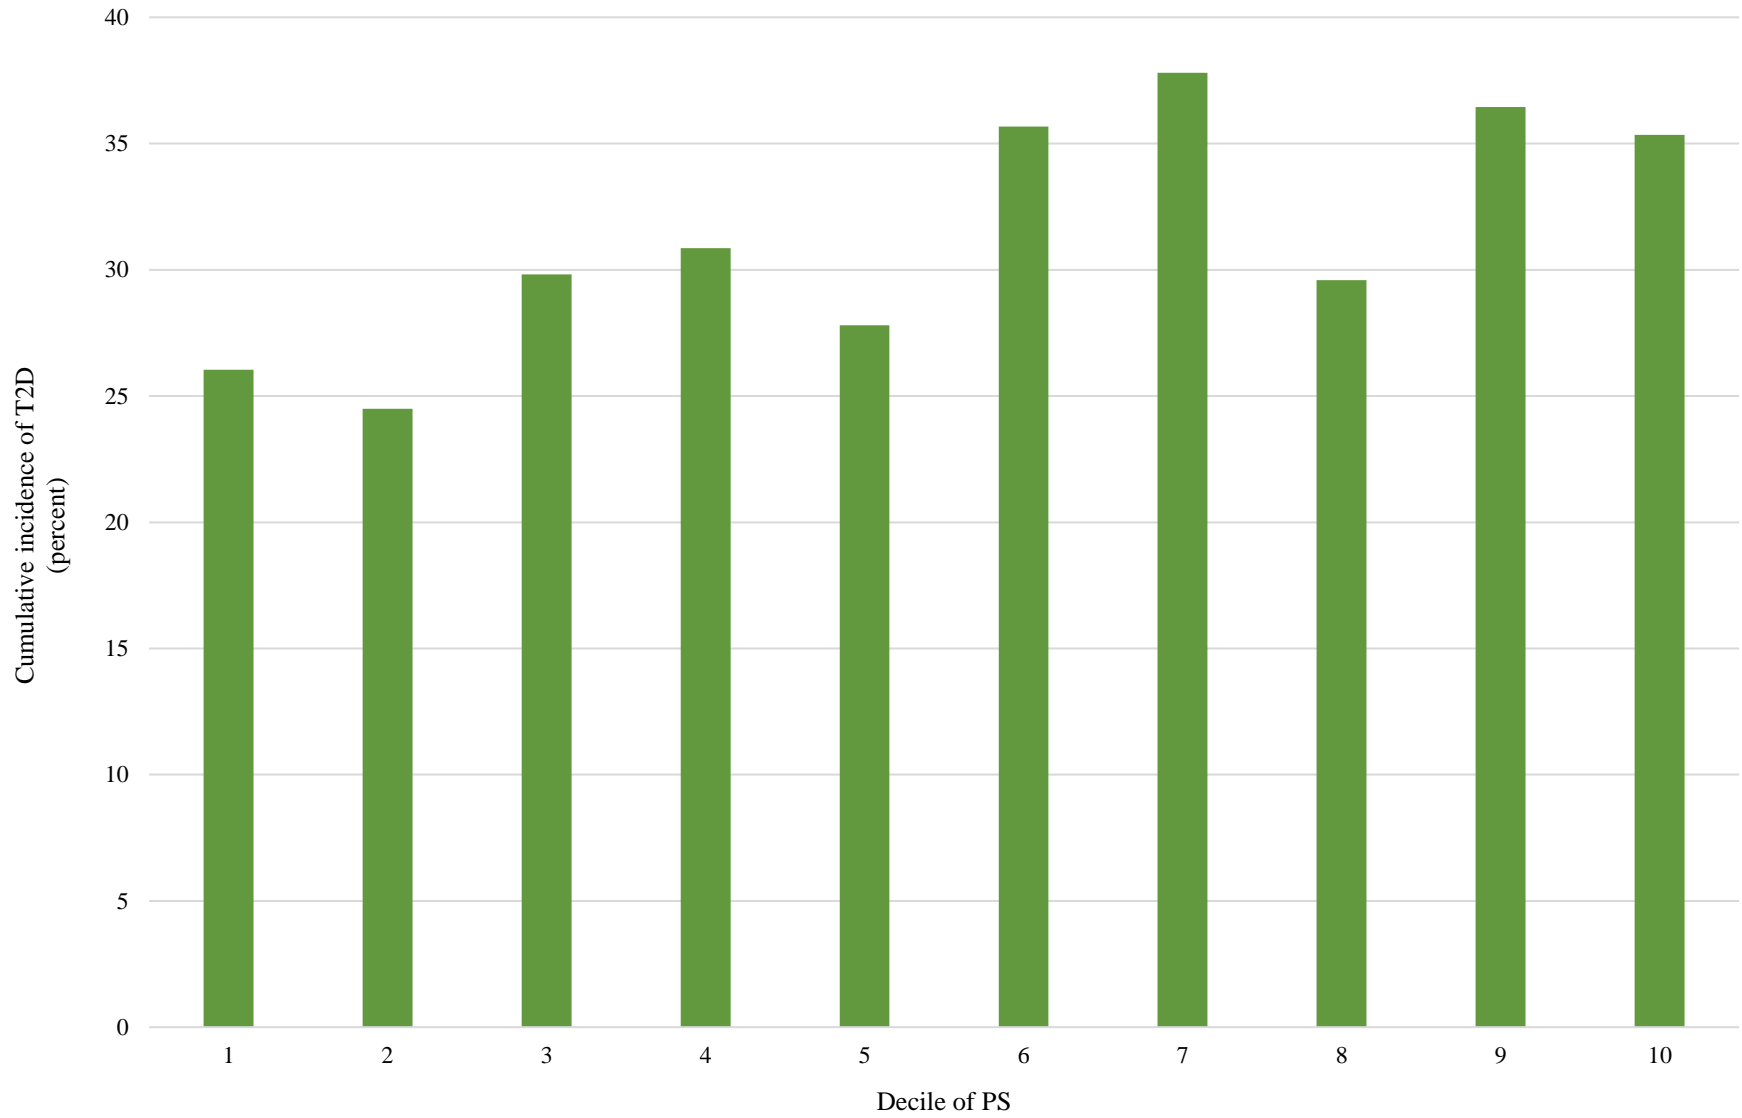

**Figure S3. Cumulative incidence of T2D by decile of the population-specific variant PS, in adult cohort.** At 10 years follow-up, 504 individuals had developed T2D and 635 remained at risk.



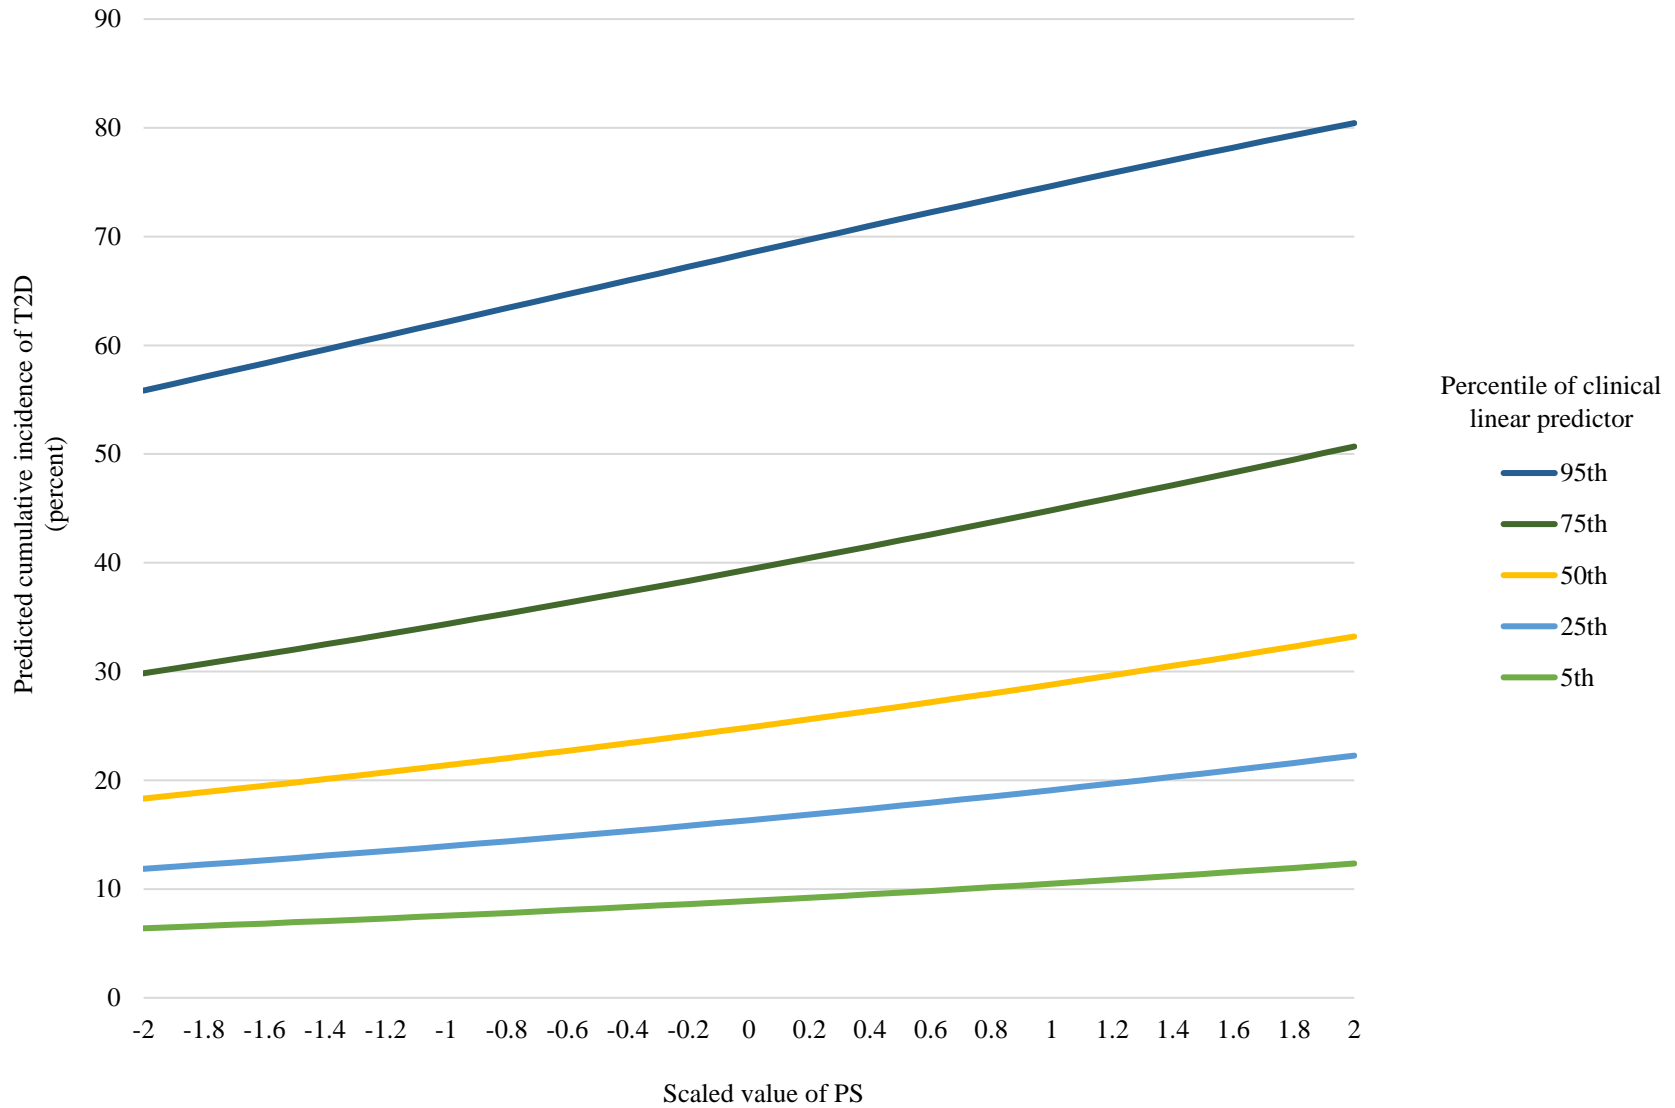

**Figure S4. Plot of predicted cumulative incidence of T2D by scaled DIAMANTE 2022 multi-ethnic composite PS and various percentiles of clinical linear predictor, in adult cohort.** At 10 years follow-up, 504 individuals had developed T2D and 635 remained at risk.

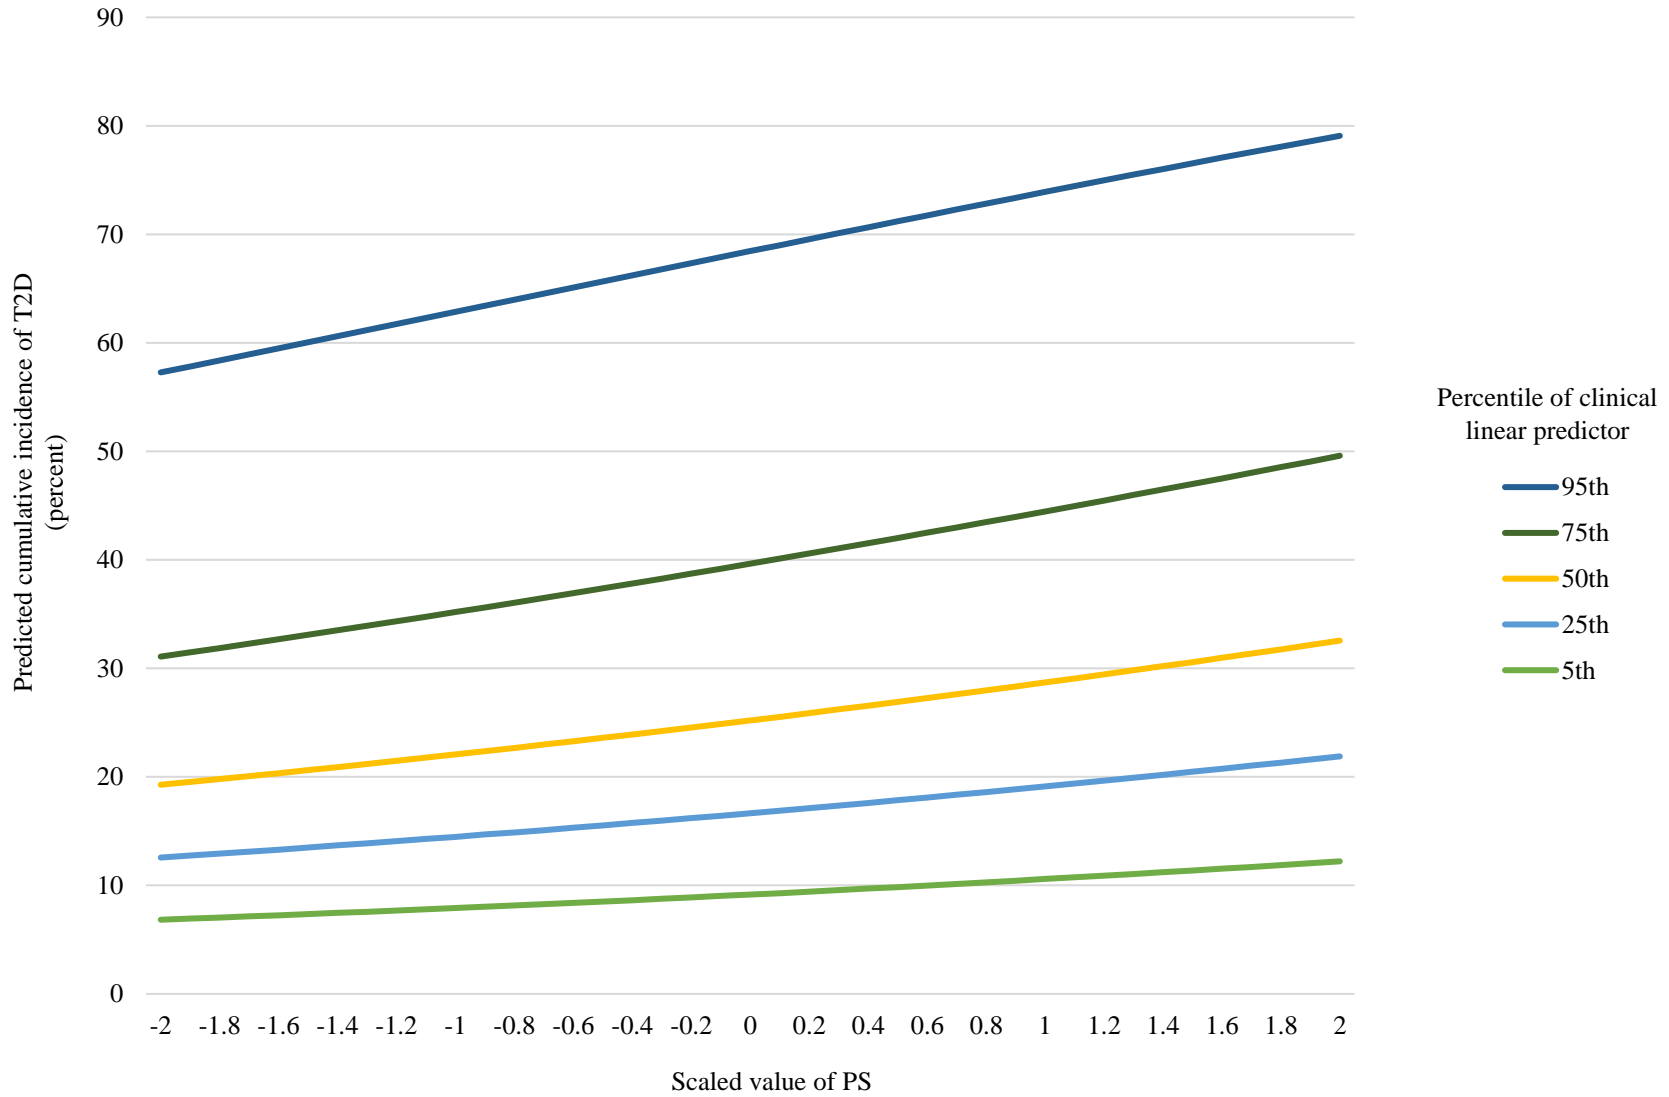

**Figure S5. Plot of predicted cumulative incidence of T2D by scaled population-specific variant PS and various percentiles of clinical linear predictor, in adult cohort.** At 10 years follow-up, 504 individuals had developed T2D and 635 remained at risk.

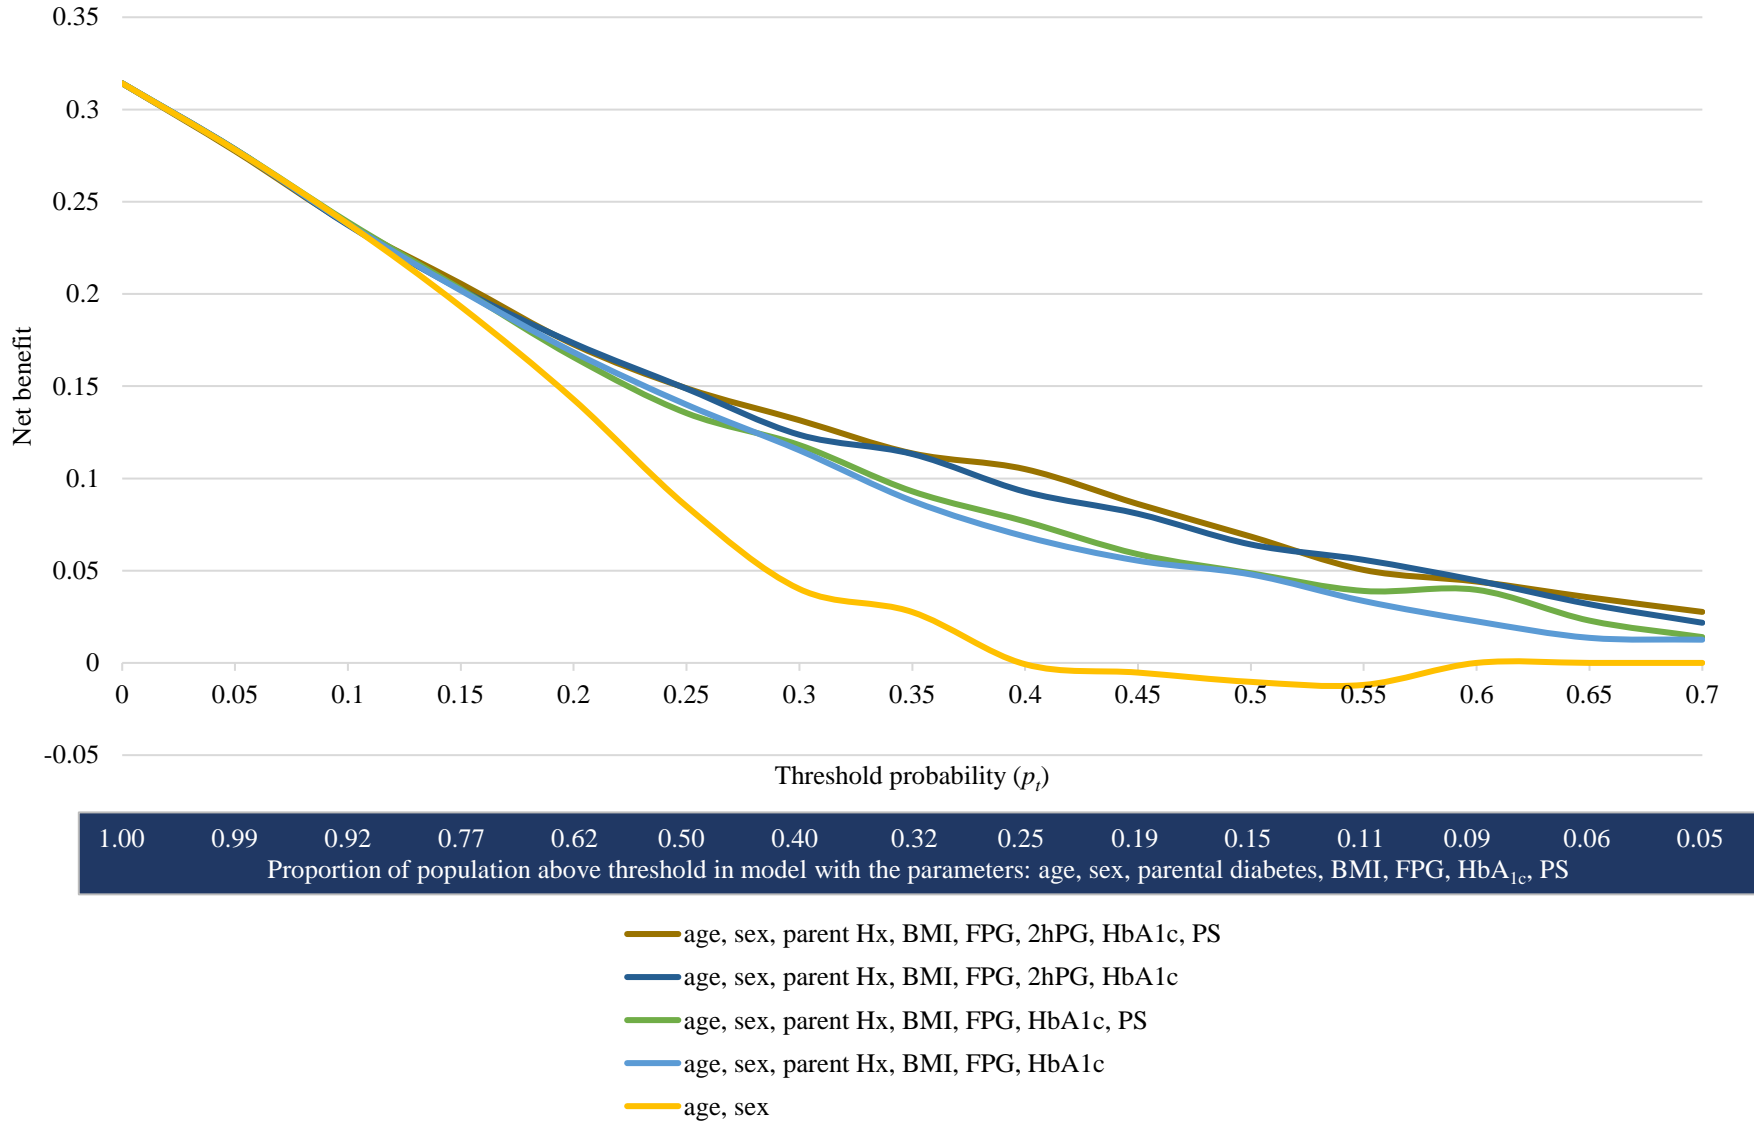

**Figure S6. Net benefit of predictive models with or without PS for T2D prediction for DIAMANTE 2022 multi-ethnic composite PS over 10-year follow-up time, in adult cohort.**

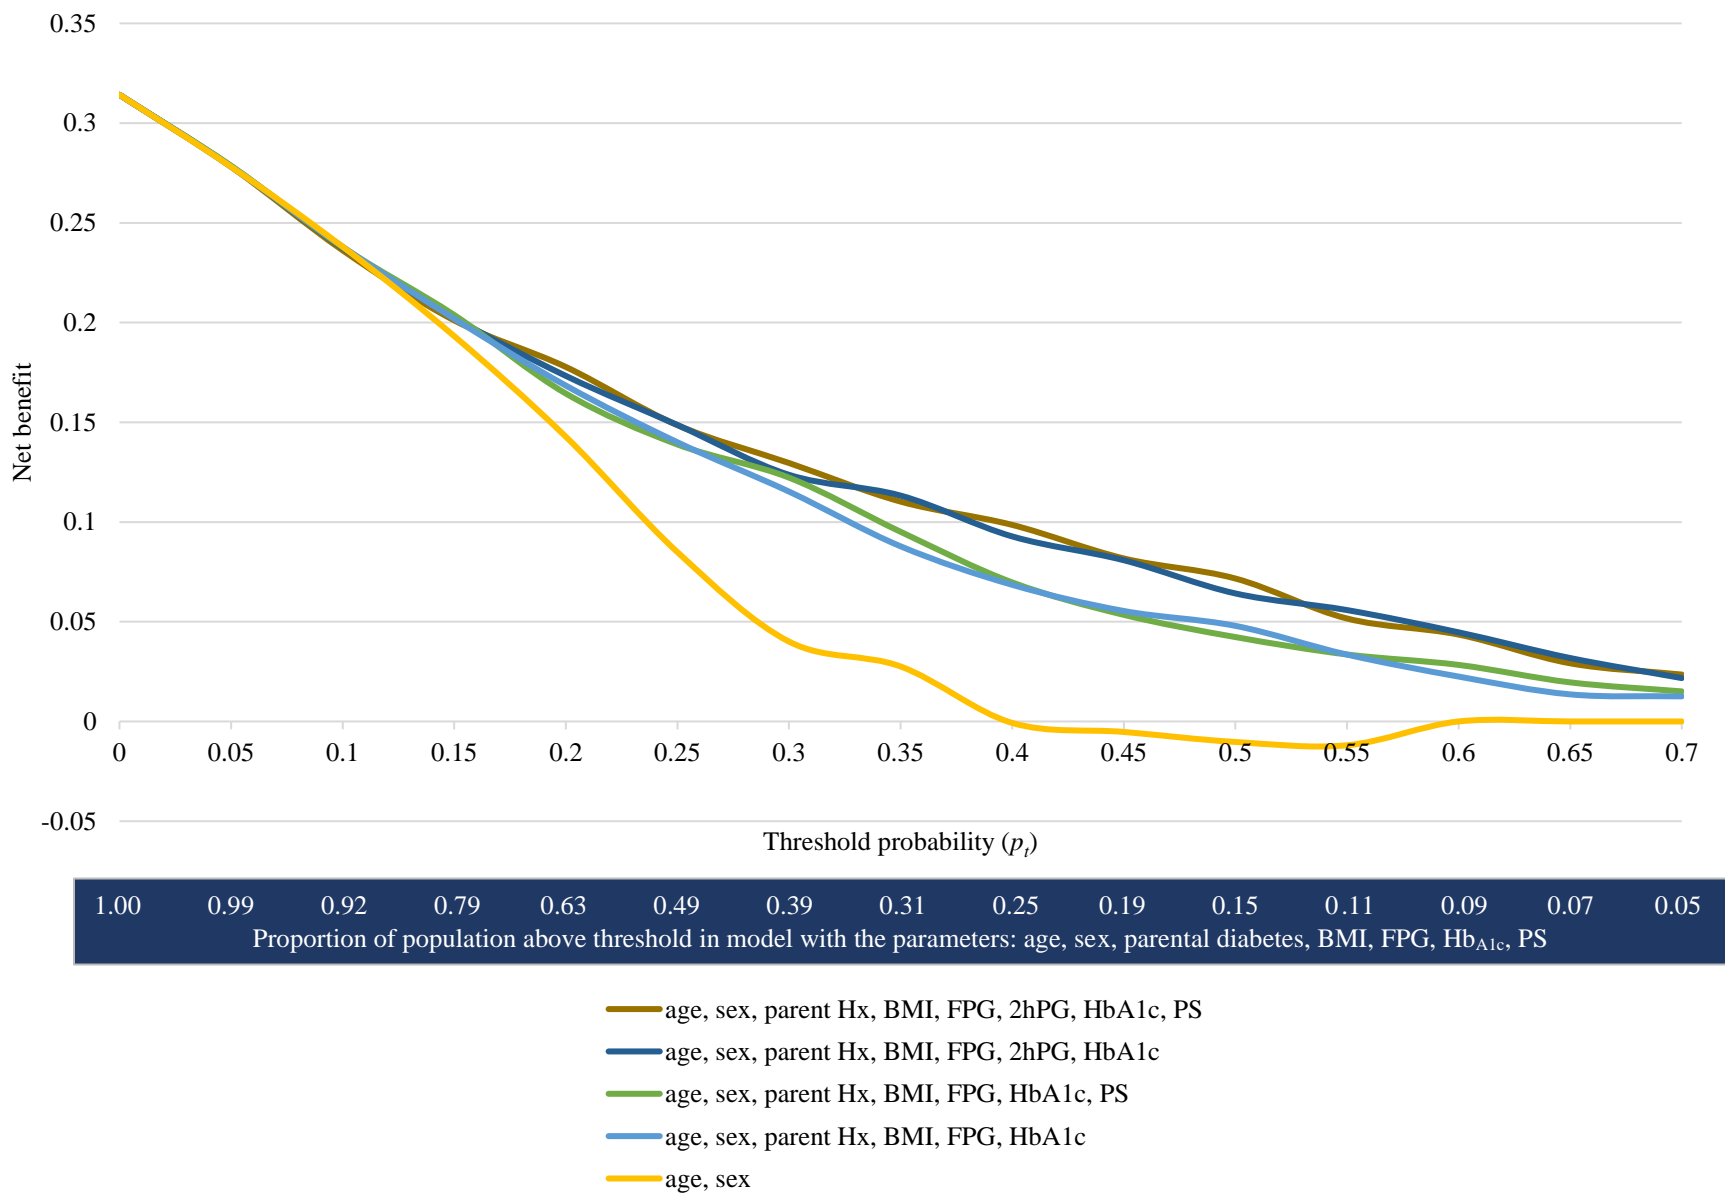

**Figure S7. Net benefit of predictive models with or without PS for T2D prediction for population-specific variant PS, in adult cohort.**

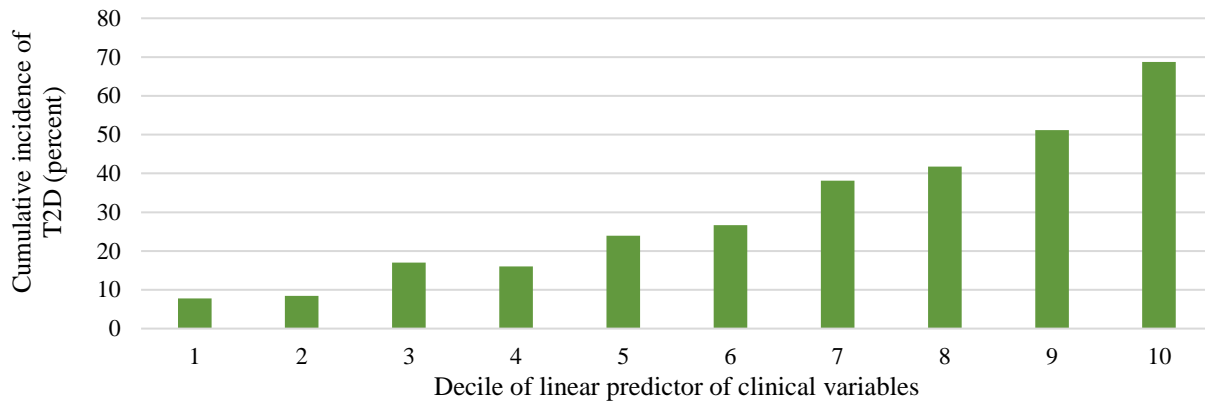

Figure S8a. Cumulative incidence of T2D over 10 years of follow-up, stratified by decile of linear predictor of clinical variables (age, sex, parental diabetes, BMI, FPG, HbA<sub>1c</sub>), in the adult cohort. At 10 years follow-up, 504 individuals had developed T2D and 635 remained at risk.

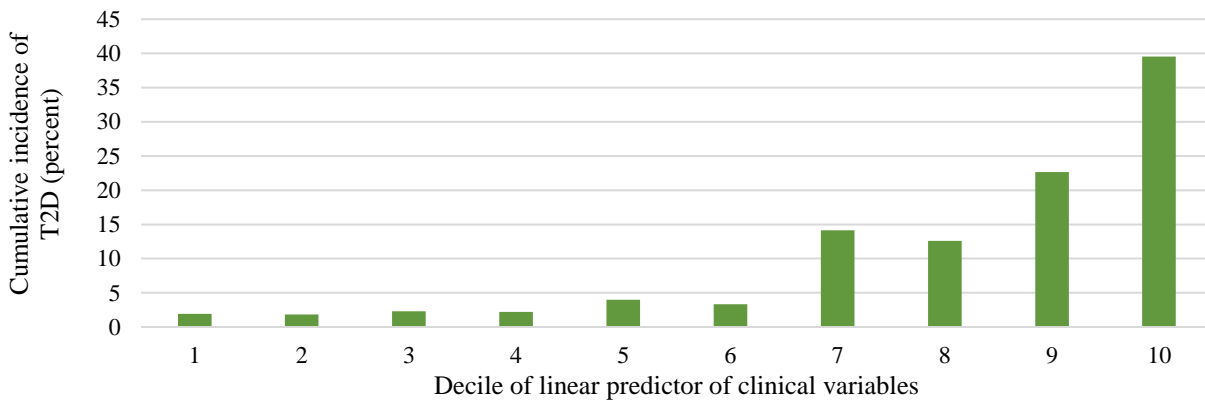

Figure S8b. Cumulative incidence of T2D over 10 years of follow-up, stratified by decile of linear predictor of clinical variables (age, sex, parental diabetes, modified BMI z, FPG, HbA<sub>1c</sub>), in the youth cohort. At 10 years follow-up, 152 had developed T2D and 745 remained at risk.

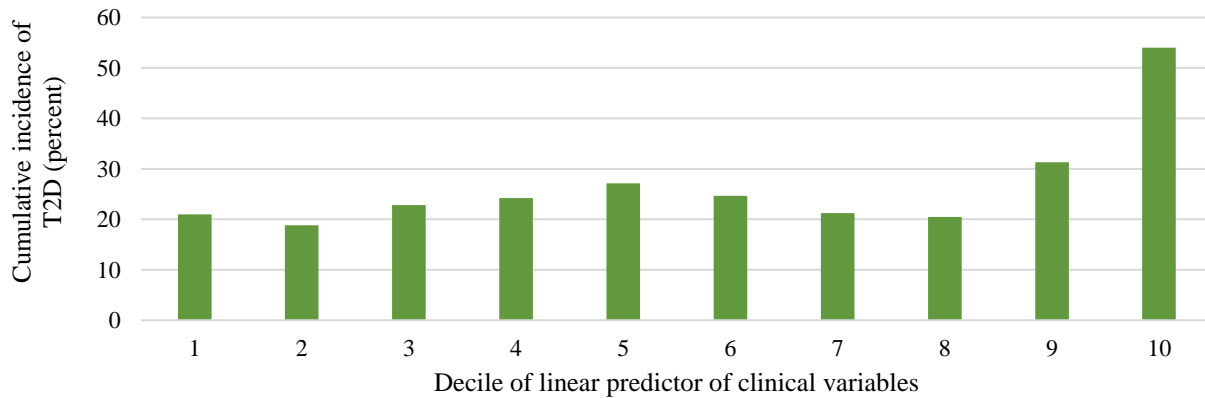

Figure S8c. Cumulative incidence of T2D over 30 years of follow-up, stratified by decile of linear predictor of clinical variables (sex, parental diabetes, birth weight), in the birth cohort. At 30 years follow-up, 340 had developed T2D and 474 remained at risk.

**Figure S8. Cumulative incidence of T2D over specified years of follow-up, stratified by decile of linear predictor of clinical variables.**

## Supplementary tables

**Table S1. Summary of continuous and binary traits in adult, youth, and birth cohorts.**

Table S1a. Summary of continuous traits of participants in adult, youth, and birth cohorts.

| Variable                                    | Birth cohort (N=2894) |        | Youth cohort (N=2229) |      | Adult cohort (N=2333) <sup>c</sup> |       |
|---------------------------------------------|-----------------------|--------|-----------------------|------|------------------------------------|-------|
|                                             | Mean                  | SD     | Mean                  | SD   | Mean                               | SD    |
| follow-up time (years)                      | 21.28                 | 7.81   | 7.99                  | 4.34 | 7.15                               | 4.45  |
| age (years)                                 |                       |        | 12.05                 | 3.73 | 31.04                              | 10.43 |
| BMI (kg/m <sup>2</sup> )                    |                       |        | 24.83                 | 7.02 | 34.33                              | 7.68  |
| FPG (mmol/l)                                |                       |        | 4.93                  | 0.40 | 5.21                               | 0.54  |
| 2hPG (mmol/l)                               |                       |        | 5.64                  | 1.28 | 6.29                               | 1.68  |
| HbA <sub>1c</sub> (mmol/mol)                |                       |        | 31.75                 | 4.21 | 33.84                              | 5.04  |
| HbA <sub>1c</sub> (%)                       |                       |        | 5.06                  | 0.38 | 5.25                               | 0.46  |
| birth weight (g)                            | 3456.86               | 532.09 |                       |      |                                    |       |
| unweighted DIAGRAM 2018 T2D PS <sup>a</sup> | 306.88                | 9.77   | 306.41                | 9.68 | 306.97                             | 9.34  |

<sup>a</sup>The unweighted DIAGRAM 2018 PS is the sum of the number of T2D risk alleles across the 293 SNPs in the DIAGRAM 2018 PS (Table S4).

Table S1b. Summary of binary traits of participants in adult, youth, and birth cohorts.

| Variable                                                  | Birth cohort (N=2894) |         | Youth cohort (N=2229) |         | Adult cohort (N=2333) <sup>c</sup> |         |
|-----------------------------------------------------------|-----------------------|---------|-----------------------|---------|------------------------------------|---------|
|                                                           | Frequency             | Percent | Frequency             | Percent | Frequency                          | Percent |
| sex female                                                | 1569                  | 54.22   | 1205                  | 54.06   | 1395                               | 59.79   |
| maternal diabetes prior to participant's entry into study |                       |         |                       |         |                                    |         |
| with diabetes                                             | 96                    | 3.32    | 490                   | 21.98   | 771                                | 33.05   |
| without diabetes                                          | 1837                  | 63.48   | 1417                  | 63.57   | 655                                | 28.08   |
| diabetes status unknown                                   | 961                   | 33.21   | 322                   | 14.45   | 907                                | 38.88   |
| paternal diabetes prior to participant's entry into study |                       |         |                       |         |                                    |         |
| with diabetes                                             | 51                    | 1.76    | 220                   | 9.87    | 327                                | 14.02   |
| without diabetes                                          | 1015                  | 35.07   | 764                   | 34.28   | 350                                | 15.00   |
| diabetes status unknown                                   | 1828                  | 63.17   | 1245                  | 55.85   | 1656                               | 70.98   |
| low birth weight (<3000g)                                 | 493                   | 17.04   |                       |         |                                    |         |
| high birth weight (≥4000g)                                | 391                   | 13.51   |                       |         |                                    |         |

**Table S2. Summary of continuous and binary traits in adult, youth, and birth cohorts, for cases versus non-cases.**

Table S2a. Summary of continuous traits of participants in adult, youth, and birth cohorts.

| Variable                                            | Birth cohort (N=2894) |        |                    |        | Youth cohort (N=2229) |      |                    |      | Adult cohort (N=2333) |       |                    |       |
|-----------------------------------------------------|-----------------------|--------|--------------------|--------|-----------------------|------|--------------------|------|-----------------------|-------|--------------------|-------|
|                                                     | Cases (N=438)         |        | Non-cases (N=2456) |        | Cases (N=228)         |      | Non-cases (N=2001) |      | Cases (N=640)         |       | Non-cases (N=1693) |       |
|                                                     | Mean                  | SD     | Mean               | SD     | Mean                  | SD   | Mean               | SD   | Mean                  | SD    | Mean               | SD    |
| follow-up time (years)                              | 23.53                 | 7.66   | 20.88              | 7.77   | 7.76                  | 4.09 | 8.01               | 4.37 | 6.39                  | 4.18  | 7.44               | 4.52  |
| age (years)                                         |                       |        |                    |        | 13.89                 | 3.89 | 11.84              | 3.65 | 32.85                 | 10.07 | 30.36              | 10.48 |
| BMI (kg/m <sup>2</sup> ) (modified BMI z for youth) |                       |        |                    |        | 1.88                  | 0.74 | 1.33               | 1.36 | 36.98                 | 7.63  | 33.32              | 7.46  |
| FPG (mmol/l)                                        |                       |        |                    |        | 5.19                  | 0.49 | 4.90               | 0.38 | 5.51                  | 0.58  | 5.10               | 0.48  |
| 2hPG (mmol/l)                                       |                       |        |                    |        | 6.64                  | 1.60 | 5.53               | 1.18 | 7.21                  | 1.78  | 5.94               | 1.51  |
| HbA <sub>1c</sub> (mmol/mol)                        |                       |        |                    |        | 33.67                 | 4.76 | 31.53              | 4.08 | 36.17                 | 5.35  | 32.96              | 4.63  |
| HbA <sub>1c</sub> (%)                               |                       |        |                    |        | 5.23                  | 0.44 | 5.04               | 0.37 | 5.46                  | 0.49  | 5.17               | 0.42  |
| birth weight (g)                                    | 3384.28               | 591.51 | 3469.80            | 519.85 |                       |      |                    |      |                       |       |                    |       |
| unweighted DIAGRAM 2018 T2D PS <sup>a</sup>         | 309.97                | 9.24   | 306.33             | 9.77   | 309.73                | 8.84 | 306.034            | 9.70 | 306.97                | 9.34  | 306.30             | 9.30  |

<sup>a</sup>The unweighted DIAGRAM 2018 PS is the sum of the number of T2D risk alleles across the 293 SNPs in the DIAGRAM 2018 PS (Table S4).

Table S2b. Summary of binary traits of participants in adult, youth, and birth cohorts.

| Variable                                                  | Birth cohort (N=2894) |         |                    |         | Youth cohort (N=2229) |         |                    |         | Adult cohort (N=2333) |         |                    |         |
|-----------------------------------------------------------|-----------------------|---------|--------------------|---------|-----------------------|---------|--------------------|---------|-----------------------|---------|--------------------|---------|
|                                                           | Cases (N=438)         |         | Non-cases (N=2456) |         | Cases (N=228)         |         | Non-cases (N=2001) |         | Cases (N=640)         |         | Non-cases (N=1693) |         |
|                                                           | Frequency             | Percent | Frequency          | Percent | Frequency             | Percent | Frequency          | Percent | Frequency             | Percent | Frequency          | Percent |
| sex female                                                | 267                   | 60.96   | 1302               | 53.01   | 141                   | 61.84   | 1064               | 53.17   | 226                   | 31.31   | 981                | 57.94   |
| maternal diabetes prior to participant's entry into study |                       |         |                    |         |                       |         |                    |         |                       |         |                    |         |
| with diabetes                                             | 33                    | 7.53    | 63                 | 2.57    | 93                    | 40.79   | 397                | 19.84   | 238                   | 37.19   | 533                | 31.48   |
| without diabetes                                          | 405                   | 92.47   | 2393               | 97.43   | 135                   | 59.21   | 1604               | 80.16   | 402                   | 62.81   | 1160               | 68.52   |
| diabetes status unknown                                   | 187                   | 42.69   | 774                | 31.51   | 42                    | 18.42   | 280                | 13.99   | 284                   | 44.38   | 623                | 36.80   |
| paternal diabetes prior to participant's entry into study |                       |         |                    |         |                       |         |                    |         |                       |         |                    |         |
| with diabetes                                             | 17                    | 3.88    | 34                 | 1.38    | 44                    | 19.30   | 176                | 8.80    | 108                   | 16.88   | 219                | 12.94   |
| without diabetes                                          | 421                   | 96.12   | 2422               | 98.62   | 184                   | 80.70   | 1825               | 91.20   | 532                   | 83.13   | 1474               | 87.06   |
| diabetes status unknown                                   | 298                   | 68.04   | 1530               | 62.30   | 117                   | 51.32   | 1128               | 56.37   | 463                   | 72.34   | 1193               | 70.47   |
| low birth weight (<3000g)                                 | 105                   | 23.97   | 388                | 15.80   |                       |         |                    |         |                       |         |                    |         |
| high birth weight (≥4000g)                                | 62                    | 14.16   | 329                | 13.40   |                       |         |                    |         |                       |         |                    |         |

**Table S3. SNPs included in the construction of the AGEN 2020<sup>7</sup> PS.**

| chr <sup>a</sup> | position <sup>b</sup> | SNP         | a1 <sup>c</sup> | a2 | a1f <sup>d</sup> | OR <sup>e</sup> | p-value                |
|------------------|-----------------------|-------------|-----------------|----|------------------|-----------------|------------------------|
| 1                | 20688352              | rs60573766  | C               | T  | 0.6347           | 1.04            | 4.30×10 <sup>-10</sup> |
| 1                | 39942242              | rs371894931 | CA              | C  | 0.1572           | 1.06            | 2.68×10 <sup>-11</sup> |
| 1                | 46244900              | rs562138031 | C               | CT | 0.7256           | 1.06            | 3.99×10 <sup>-12</sup> |
| 1                | 51191935              | rs11205766  | T               | A  | 0.9031           | 1.09            | 7.49×10 <sup>-15</sup> |
| 1                | 64107893              | rs2269245   | G               | A  | 0.8153           | 1.06            | 5.40×10 <sup>-10</sup> |
| 1                | 177878933             | rs532504    | A               | G  | 0.2133           | 1.06            | 7.39×10 <sup>-12</sup> |
| 1                | 184014593             | rs1327123   | C               | G  | 0.4596           | 1.04            | 7.00×10 <sup>-9</sup>  |
| 1                | 204474581             | rs201297151 | CAAAAAAAAA      | C  | 0.4404           | 1.04            | 3.37×10 <sup>-8</sup>  |
| 1                | 214155398             | rs12403994  | C               | A  | 0.6228           | 1.05            | 6.05×10 <sup>-12</sup> |
| 1                | 229642499             | rs238763    | T               | A  | 0.6783           | 1.05            | 5.04×10 <sup>-11</sup> |
| 2                | 632789                | rs10634531  | CTTG            | C  | 0.9064           | 1.1             | 2.37×10 <sup>-17</sup> |
| 2                | 27730940              | rs1260326   | C               | T  | 0.4562           | 1.07            | 1.01×10 <sup>-21</sup> |
| 2                | 45192080              | rs12712928  | C               | G  | 0.4022           | 1.06            | 1.83×10 <sup>-14</sup> |
| 2                | 60586707              | rs243018    | G               | C  | 0.6656           | 1.06            | 1.55×10 <sup>-15</sup> |
| 2                | 120231070             | rs3731600   | C               | G  | 0.9675           | 1.13            | 6.86×10 <sup>-9</sup>  |
| 2                | 149568261             | rs200576292 | CT              | C  | 0.6603           | 1.05            | 1.29×10 <sup>-9</sup>  |
| 2                | 165381518             | rs75536691  | A               | G  | 0.976            | 1.2             | 1.16×10 <sup>-15</sup> |
| 2                | 213687103             | rs75179644  | T               | C  | 0.8992           | 1.08            | 5.36×10 <sup>-10</sup> |
| 2                | 234191103             | rs117809958 | A               | T  | 0.0181           | 1.25            | 1.98×10 <sup>-15</sup> |
| 3                | 12385357              | rs3963364   | C               | A  | 0.95             | 1.12            | 3.49×10 <sup>-11</sup> |
| 3                | 23258614              | rs11926494  | G               | A  | 0.82             | 1.12            | 2.69×10 <sup>-37</sup> |
| 3                | 63904715              | rs67114627  | AAG             | A  | 0.6459           | 1.09            | 9.10×10 <sup>-32</sup> |
| 3                | 114968018             | rs6806156   | T               | C  | 0.6107           | 1.05            | 1.59×10 <sup>-11</sup> |
| 3                | 121965199             | rs9859381   | G               | T  | 0.486            | 1.04            | 2.86×10 <sup>-9</sup>  |
| 3                | 123174832             | rs60054445  | C               | T  | 0.6643           | 1.05            | 5.62×10 <sup>-12</sup> |
| 3                | 124921920             | rs12497133  | A               | G  | 0.3231           | 1.04            | 1.14×10 <sup>-8</sup>  |
| 3                | 152382352             | rs1850421   | A               | C  | 0.2777           | 1.05            | 1.41×10 <sup>-9</sup>  |
| 3                | 170643788             | rs201018682 | T               | C  | 0.8162           | 1.06            | 1.01×10 <sup>-11</sup> |
| 3                | 185495320             | rs13092876  | A               | G  | 0.3122           | 1.13            | 1.91×10 <sup>-66</sup> |
| 3                | 186649931             | rs11332772  | C               | CG | 0.5571           | 1.05            | 1.07×10 <sup>-10</sup> |
| 3                | 187698333             | rs13086331  | T               | C  | 0.8187           | 1.05            | 7.29×10 <sup>-9</sup>  |
| 3                | 195830310             | rs9866168   | T               | A  | 0.6394           | 1.05            | 1.55×10 <sup>-9</sup>  |
| 4                | 1254535               | rs7656416   | C               | T  | 0.6833           | 1.11            | 9.01×10 <sup>-42</sup> |
| 4                | 1784605               | rs6831006   | G               | C  | 0.2736           | 1.07            | 2.92×10 <sup>-16</sup> |
| 4                | 6303731               | rs147834269 | G               | A  | 0.9784           | 1.23            | 9.10×10 <sup>-12</sup> |
| 4                | 45186139              | rs10938398  | A               | G  | 0.2921           | 1.05            | 3.84×10 <sup>-10</sup> |
| 4                | 71844118              | rs28599782  | A               | G  | 0.209            | 1.07            | 4.64×10 <sup>-16</sup> |
| 4                | 85339618              | rs117624659 | T               | C  | 0.9765           | 1.23            | 1.95×10 <sup>-16</sup> |
| 4                | 153520279             | rs10011838  | G               | A  | 0.493            | 1.08            | 1.43×10 <sup>-27</sup> |
| 5                | 14768092              | rs6885132   | C               | G  | 0.556            | 1.04            | 2.59×10 <sup>-9</sup>  |



|   |           |             |     |    |        |      |                         |
|---|-----------|-------------|-----|----|--------|------|-------------------------|
| 5 | 36257018  | rs16902871  | G   | A  | 0.149  | 1.06 | 3.34×10 <sup>-9</sup>   |
| 5 | 50079603  | rs74334916  | C   | A  | 0.0748 | 1.07 | 4.33×10 <sup>-8</sup>   |
| 5 | 51751574  | rs12109081  | T   | A  | 0.3608 | 1.04 | 1.08×10 <sup>-8</sup>   |
| 5 | 55810305  | rs256904    | T   | A  | 0.4923 | 1.08 | 3.56×10 <sup>-29</sup>  |
| 5 | 74574984  | rs2126736   | A   | G  | 0.4279 | 1.04 | 1.84×10 <sup>-8</sup>   |
| 5 | 95848503  | rs6556925   | C   | A  | 0.4155 | 1.04 | 3.12×10 <sup>-9</sup>   |
| 5 | 133864599 | rs329122    | A   | G  | 0.3865 | 1.04 | 2.22×10 <sup>-8</sup>   |
| 5 | 176513896 | rs3135911   | A   | C  | 0.4324 | 1.05 | 1.51×10 <sup>-12</sup>  |
| 6 | 7231843   | rs9379084   | G   | A  | 0.7986 | 1.07 | 2.20×10 <sup>-14</sup>  |
| 6 | 20683164  | rs9350271   | A   | G  | 0.4225 | 1.21 | 4.96×10 <sup>-183</sup> |
| 6 | 31026236  | rs76541615  | T   | G  | 0.7959 | 1.08 | 1.08×10 <sup>-17</sup>  |
| 6 | 34214670  | rs4711389   | A   | G  | 0.8925 | 1.1  | 7.28×10 <sup>-17</sup>  |
| 6 | 39046644  | rs742762    | A   | C  | 0.7118 | 1.08 | 1.79×10 <sup>-22</sup>  |
| 6 | 50787459  | rs62405419  | T   | G  | 0.2682 | 1.05 | 3.79×10 <sup>-9</sup>   |
| 6 | 117996631 | rs80196932  | T   | C  | 0.7859 | 1.06 | 7.57×10 <sup>-13</sup>  |
| 6 | 126964510 | rs4273712   | G   | A  | 0.4688 | 1.05 | 2.56×10 <sup>-12</sup>  |
| 6 | 131954797 | rs7739842   | G   | T  | 0.3564 | 1.05 | 1.55×10 <sup>-11</sup>  |
| 6 | 137294771 | rs35389258  | T   | TA | 0.45   | 1.05 | 9.49×10 <sup>-14</sup>  |
| 6 | 139205386 | rs9376382   | C   | T  | 0.5989 | 1.04 | 1.50×10 <sup>-8</sup>   |
| 6 | 143056556 | rs9390022   | T   | C  | 0.7997 | 1.05 | 6.35×10 <sup>-9</sup>   |
| 7 | 13886654  | rs7787720   | T   | C  | 0.4209 | 1.06 | 2.26×10 <sup>-15</sup>  |
| 7 | 14898282  | rs17168486  | T   | C  | 0.4181 | 1.07 | 8.23×10 <sup>-22</sup>  |
| 7 | 28219310  | rs3735567   | G   | A  | 0.7776 | 1.06 | 3.05×10 <sup>-12</sup>  |
| 7 | 44174857  | rs2908279   | G   | T  | 0.627  | 1.05 | 8.42×10 <sup>-11</sup>  |
| 7 | 55984953  | rs565050730 | GA  | G  | 0.3341 | 1.04 | 4.43×10 <sup>-8</sup>   |
| 7 | 69189726  | rs610930    | A   | G  | 0.2868 | 1.07 | 1.38×10 <sup>-19</sup>  |
| 7 | 69696905  | rs12698877  | G   | A  | 0.3362 | 1.07 | 6.96×10 <sup>-22</sup>  |
| 7 | 89752238  | rs62469016  | C   | G  | 0.2231 | 1.07 | 1.52×10 <sup>-15</sup>  |
| 7 | 93107093  | rs2074120   | A   | C  | 0.323  | 1.04 | 8.38×10 <sup>-9</sup>   |
| 7 | 102336979 | rs75990271  | T   | C  | 0.8152 | 1.07 | 3.22×10 <sup>-11</sup>  |
| 7 | 126526991 | rs117737118 | G   | A  | 0.0934 | 1.18 | 3.31×10 <sup>-31</sup>  |
| 7 | 127253550 | rs2233580   | T   | C  | 0.0858 | 1.34 | 2.73×10 <sup>-132</sup> |
| 7 | 127761917 | rs61342118  | A   | C  | 0.0831 | 1.34 | 4.78×10 <sup>-105</sup> |
| 7 | 140579350 | rs71170768  | TA  | T  | 0.3159 | 1.07 | 2.17×10 <sup>-10</sup>  |
| 7 | 157024510 | rs1182444   | G   | A  | 0.4947 | 1.05 | 1.67×10 <sup>-12</sup>  |
| 8 | 17927609  | rs34642578  | T   | C  | 0.0533 | 1.09 | 1.60×10 <sup>-9</sup>   |
| 8 | 36832310  | rs56687477  | A   | G  | 0.3227 | 1.05 | 1.53×10 <sup>-10</sup>  |
| 8 | 37391203  | rs4739515   | G   | C  | 0.5383 | 1.05 | 1.68×10 <sup>-11</sup>  |
| 8 | 38343012  | rs328301    | T   | C  | 0.3278 | 1.04 | 4.11×10 <sup>-8</sup>   |
| 8 | 41512648  | rs33981001  | GGT | G  | 0.3888 | 1.08 | 5.27×10 <sup>-28</sup>  |
| 8 | 73503743  | rs349359    | C   | A  | 0.2424 | 1.04 | 3.05×10 <sup>-8</sup>   |
| 8 | 75214398  | rs149265787 | G   | A  | 0.0239 | 1.14 | 5.68×10 <sup>-10</sup>  |
| 8 | 95960886  | rs896852    | G   | T  | 0.2998 | 1.04 | 6.42×10 <sup>-9</sup>   |

|    |           |             |    |       |        |      |                         |
|----|-----------|-------------|----|-------|--------|------|-------------------------|
| 8  | 118184783 | rs13266634  | C  | T     | 0.5857 | 1.12 | 3.73×10 <sup>-67</sup>  |
| 8  | 126471274 | rs60089934  | A  | G     | 0.3777 | 1.04 | 3.33×10 <sup>-9</sup>   |
| 8  | 132879795 | rs73708054  | C  | T     | 0.2523 | 1.04 | 4.41×10 <sup>-8</sup>   |
| 9  | 1032567   | rs1016565   | A  | G     | 0.4209 | 1.04 | 2.18×10 <sup>-8</sup>   |
| 9  | 4290085   | rs4237150   | C  | G     | 0.4262 | 1.07 | 4.46×10 <sup>-27</sup>  |
| 9  | 22132878  | rs10965248  | T  | C     | 0.563  | 1.2  | 4.42×10 <sup>-164</sup> |
| 9  | 81917127  | rs1328412   | T  | C     | 0.9448 | 1.1  | 6.41×10 <sup>-11</sup>  |
| 9  | 84308948  | rs2796441   | G  | A     | 0.3897 | 1.08 | 1.43×10 <sup>-28</sup>  |
| 9  | 98278413  | rs113154802 | C  | T     | 0.8885 | 1.06 | 3.51×10 <sup>-8</sup>   |
| 9  | 107597527 | rs201375651 | CA | C     | 0.3948 | 1.04 | 2.56×10 <sup>-8</sup>   |
| 9  | 136149500 | rs529565    | C  | T     | 0.4445 | 1.04 | 1.68×10 <sup>-10</sup>  |
| 9  | 139246588 | rs376993806 | G  | A     | 0.8821 | 1.14 | 4.52×10 <sup>-26</sup>  |
| 10 | 12309139  | rs11257657  | G  | C     | 0.4832 | 1.12 | 9.77×10 <sup>-62</sup>  |
| 10 | 23487778  | rs77065181  | A  | G     | 0.0468 | 1.09 | 1.57×10 <sup>-8</sup>   |
| 10 | 63712602  | rs141583966 | G  | GGTGT | 0.9093 | 1.08 | 7.65×10 <sup>-10</sup>  |
| 10 | 64976133  | rs148928116 | T  | TA    | 0.7945 | 1.06 | 2.53×10 <sup>-13</sup>  |
| 10 | 71273357  | rs1955163   | G  | A     | 0.5409 | 1.05 | 1.68×10 <sup>-11</sup>  |
| 10 | 77323643  | rs34907385  | C  | T     | 0.4914 | 1.05 | 5.37×10 <sup>-12</sup>  |
| 10 | 80951130  | rs34204798  | C  | CG    | 0.5681 | 1.06 | 5.02×10 <sup>-19</sup>  |
| 10 | 89684214  | rs1236816   | A  | C     | 0.499  | 1.04 | 4.31×10 <sup>-10</sup>  |
| 10 | 93592703  | rs147689733 | T  | C     | 0.0209 | 1.31 | 1.21×10 <sup>-27</sup>  |
| 10 | 94435673  | rs35906730  | G  | A     | 0.2645 | 1.15 | 1.27×10 <sup>-71</sup>  |
| 10 | 95009180  | rs565236700 | C  | T     | 0.0235 | 1.23 | 5.54×10 <sup>-19</sup>  |
| 10 | 99056921  | rs10736116  | C  | G     | 0.3058 | 1.05 | 9.21×10 <sup>-11</sup>  |
| 10 | 112678657 | rs7895872   | T  | G     | 0.5787 | 1.05 | 1.37×10 <sup>-11</sup>  |
| 10 | 114754088 | rs7901695   | C  | T     | 0.0382 | 1.32 | 8.18×10 <sup>-62</sup>  |
| 10 | 122929493 | rs10886863  | C  | T     | 0.6641 | 1.06 | 5.28×10 <sup>-17</sup>  |
| 10 | 124150342 | rs112820281 | C  | CTGGA | 0.4098 | 1.05 | 1.42×10 <sup>-10</sup>  |
| 11 | 2203154   | rs11043003  | C  | T     | 0.0819 | 1.11 | 1.03×10 <sup>-16</sup>  |
| 11 | 2858546   | rs2237897   | C  | T     | 0.6321 | 1.28 | 1.88×10 <sup>-245</sup> |
| 11 | 17415190  | rs4148646   | C  | G     | 0.3846 | 1.08 | 1.70×10 <sup>-26</sup>  |
| 11 | 27729505  | rs4922793   | A  | G     | 0.5655 | 1.04 | 1.62×10 <sup>-10</sup>  |
| 11 | 69462642  | rs602652    | A  | G     | 0.8088 | 1.06 | 5.32×10 <sup>-9</sup>   |
| 11 | 72463435  | rs7109575   | G  | A     | 0.9448 | 1.15 | 5.46×10 <sup>-21</sup>  |
| 11 | 92708710  | rs10830963  | G  | C     | 0.421  | 1.04 | 4.49×10 <sup>-8</sup>   |
| 12 | 4381981   | rs7304270   | C  | T     | 0.7614 | 1.07 | 1.04×10 <sup>-12</sup>  |
| 12 | 27963402  | rs3751236   | G  | A     | 0.6717 | 1.07 | 6.58×10 <sup>-21</sup>  |
| 12 | 31441179  | rs80234489  | C  | A     | 0.1699 | 1.11 | 4.33×10 <sup>-32</sup>  |
| 12 | 50269863  | rs77978149  | T  | C     | 0.0898 | 1.08 | 5.70×10 <sup>-9</sup>   |
| 12 | 66232810  | rs2583934   | T  | G     | 0.3396 | 1.06 | 4.95×10 <sup>-16</sup>  |
| 12 | 71449521  | rs7313668   | T  | G     | 0.3742 | 1.05 | 4.91×10 <sup>-11</sup>  |
| 12 | 97850215  | rs10860209  | C  | A     | 0.589  | 1.04 | 5.67×10 <sup>-9</sup>   |
| 12 | 108629780 | rs1426371   | G  | A     | 0.4911 | 1.05 | 7.76×10 <sup>-12</sup>  |

|    |           |             |    |    |        |      |                        |
|----|-----------|-------------|----|----|--------|------|------------------------|
| 12 | 111836771 | rs149212747 | A  | AC | 0.7948 | 1.07 | 2.07×10 <sup>-11</sup> |
| 12 | 112736118 | rs77768175  | A  | G  | 0.8068 | 1.07 | 1.39×10 <sup>-10</sup> |
| 12 | 114123722 | rs7307263   | G  | C  | 0.4272 | 1.04 | 3.64×10 <sup>-8</sup>  |
| 12 | 118400856 | rs111246699 | A  | G  | 0.2572 | 1.06 | 1.54×10 <sup>-15</sup> |
| 12 | 121363506 | rs118074491 | G  | A  | 0.0323 | 1.21 | 8.83×10 <sup>-20</sup> |
| 13 | 22589883  | rs9316706   | A  | G  | 0.3505 | 1.04 | 3.33×10 <sup>-9</sup>  |
| 13 | 26781367  | rs568052023 | C  | CA | 0.5812 | 1.07 | 2.62×10 <sup>-22</sup> |
| 13 | 33557173  | rs7983505   | T  | A  | 0.1572 | 1.08 | 3.22×10 <sup>-18</sup> |
| 13 | 51088809  | rs123378    | G  | A  | 0.1951 | 1.05 | 2.22×10 <sup>-10</sup> |
| 13 | 80707429  | rs1215468   | A  | G  | 0.7185 | 1.09 | 1.32×10 <sup>-31</sup> |
| 13 | 91949562  | rs9515905   | A  | G  | 0.831  | 1.08 | 7.24×10 <sup>-18</sup> |
| 14 | 24878370  | rs12437434  | C  | T  | 0.7127 | 1.05 | 1.02×10 <sup>-9</sup>  |
| 14 | 38809661  | rs61975988  | A  | G  | 0.4569 | 1.04 | 1.97×10 <sup>-9</sup>  |
| 14 | 77382503  | rs58524310  | G  | A  | 0.3268 | 1.05 | 8.41×10 <sup>-11</sup> |
| 14 | 101255172 | rs73347525  | A  | G  | 0.7556 | 1.06 | 7.46×10 <sup>-11</sup> |
| 14 | 103237952 | rs55700915  | A  | G  | 0.4344 | 1.04 | 1.50×10 <sup>-8</sup>  |
| 15 | 28546173  | rs76704029  | T  | C  | 0.7322 | 1.06 | 3.39×10 <sup>-8</sup>  |
| 15 | 38828140  | rs8043085   | T  | G  | 0.4493 | 1.05 | 2.06×10 <sup>-14</sup> |
| 15 | 40615872  | rs12907887  | C  | G  | 0.229  | 1.08 | 1.74×10 <sup>-20</sup> |
| 15 | 52587740  | rs149336329 | G  | T  | 0.9494 | 1.11 | 1.70×10 <sup>-9</sup>  |
| 15 | 62394264  | rs8037894   | G  | C  | 0.5856 | 1.08 | 7.30×10 <sup>-33</sup> |
| 15 | 68080886  | rs4776970   | A  | T  | 0.2214 | 1.04 | 3.41×10 <sup>-8</sup>  |
| 15 | 75742095  | rs8038760   | A  | C  | 0.6081 | 1.05 | 1.81×10 <sup>-11</sup> |
| 15 | 77776562  | rs952472    | C  | A  | 0.3949 | 1.07 | 1.62×10 <sup>-26</sup> |
| 15 | 90428894  | rs10852123  | A  | C  | 0.201  | 1.06 | 8.38×10 <sup>-13</sup> |
| 15 | 91522253  | rs8026714   | A  | G  | 0.486  | 1.07 | 1.06×10 <sup>-22</sup> |
| 15 | 93825384  | rs61021634  | A  | G  | 0.4379 | 1.05 | 1.41×10 <sup>-11</sup> |
| 15 | 99366409  | rs79826452  | A  | G  | 0.8904 | 1.07 | 3.16×10 <sup>-8</sup>  |
| 16 | 3647098   | rs2240885   | A  | G  | 0.4027 | 1.04 | 2.79×10 <sup>-9</sup>  |
| 16 | 20323168  | rs117267808 | A  | G  | 0.0782 | 1.11 | 4.85×10 <sup>-17</sup> |
| 16 | 53800954  | rs1421085   | C  | T  | 0.1668 | 1.14 | 1.55×10 <sup>-48</sup> |
| 16 | 72022534  | rs12600132  | T  | C  | 0.4316 | 1.04 | 5.95×10 <sup>-9</sup>  |
| 16 | 73100308  | rs6416749   | C  | T  | 0.3746 | 1.05 | 3.40×10 <sup>-12</sup> |
| 16 | 81534790  | rs2925979   | T  | C  | 0.3635 | 1.04 | 1.51×10 <sup>-9</sup>  |
| 17 | 6953781   | rs186568031 | T  | C  | 0.0942 | 1.12 | 8.99×10 <sup>-24</sup> |
| 17 | 29642430  | rs7502556   | T  | C  | 0.5346 | 1.05 | 3.79×10 <sup>-11</sup> |
| 17 | 36101586  | rs8064454   | A  | C  | 0.3049 | 1.13 | 6.47×10 <sup>-61</sup> |
| 17 | 65641651  | rs2706710   | T  | C  | 0.0813 | 1.07 | 1.67×10 <sup>-8</sup>  |
| 17 | 73187031  | rs35559984  | CA | C  | 0.6519 | 1.05 | 7.88×10 <sup>-9</sup>  |
| 18 | 7076836   | rs9948462   | T  | C  | 0.7048 | 1.05 | 8.70×10 <sup>-10</sup> |
| 18 | 57852587  | rs476828    | C  | T  | 0.243  | 1.09 | 4.81×10 <sup>-27</sup> |
| 18 | 60845884  | rs12454712  | T  | C  | 0.5122 | 1.06 | 1.40×10 <sup>-15</sup> |
| 19 | 7293119   | rs8101064   | T  | C  | 0.1277 | 1.07 | 3.53×10 <sup>-8</sup>  |

|    |          |             |            |     |        |      |                        |
|----|----------|-------------|------------|-----|--------|------|------------------------|
| 19 | 7986638  | rs475002    | G          | C   | 0.5184 | 1.04 | 9.80×10 <sup>-10</sup> |
| 19 | 12509536 | rs4804181   | A          | C   | 0.5139 | 1.04 | 1.54×10 <sup>-8</sup>  |
| 19 | 21529576 | rs145389767 | G          | A   | 0.9794 | 1.22 | 2.42×10 <sup>-13</sup> |
| 19 | 22100706 | rs142395395 | A          | G   | 0.9691 | 1.24 | 6.95×10 <sup>-23</sup> |
| 19 | 33894846 | rs10422861  | C          | T   | 0.5358 | 1.06 | 2.29×10 <sup>-16</sup> |
| 19 | 46157928 | rs113036890 | CAAAAAAAAA | C   | 0.7313 | 1.1  | 1.03×10 <sup>-32</sup> |
| 20 | 22430241 | rs73085586  | G          | A   | 0.6437 | 1.04 | 1.66×10 <sup>-9</sup>  |
| 20 | 42994812 | rs12625671  | C          | T   | 0.442  | 1.07 | 2.25×10 <sup>-21</sup> |
| 20 | 48830772 | rs13040225  | A          | T   | 0.5132 | 1.05 | 1.64×10 <sup>-14</sup> |
| 20 | 50155386 | rs6021276   | T          | C   | 0.4101 | 1.04 | 6.66×10 <sup>-10</sup> |
| 20 | 57477177 | rs11477757  | TC         | TCC | 0.6687 | 1.06 | 1.27×10 <sup>-8</sup>  |
| 22 | 29380119 | rs147413364 | T          | TA  | 0.3571 | 1.04 | 3.38×10 <sup>-8</sup>  |
| 22 | 46313618 | rs28637892  | T          | G   | 0.2153 | 1.05 | 3.66×10 <sup>-9</sup>  |
| 22 | 50356302 | rs28691713  | C          | T   | 0.5552 | 1.07 | 1.79×10 <sup>-17</sup> |

<sup>a</sup> Chr is chromosome.

<sup>b</sup> Position is in base pairs (bp) on Genome Reference Consortium Human Build 37.

<sup>c</sup> A1 and a2 are the alleles from AGEN 2020, with the effect allele given first.

<sup>d</sup> A1f is the frequency of a1 in AGEN 2020 study population.

<sup>e</sup> OR is reported per copy of the effect allele, and is also reported with the 95% confidence interval (CI) of the OR.

**Table S4. Summary statistics for SNPs included in the construction of the DIAGRAM 2018<sup>8</sup> PS.**

| chr <sup>a</sup> | position <sup>b</sup> | SNP        | a1 <sup>c</sup> | a2 | a1f <sup>d</sup> | OR <sup>e</sup> | p-value               |
|------------------|-----------------------|------------|-----------------|----|------------------|-----------------|-----------------------|
| 1                | 40035928              | rs3768321  | T               | G  | 0.2              | 1.09            | 2.6×10 <sup>-26</sup> |
| 1                | 117532790             | rs1127215  | C               | T  | 0.584            | 1.05            | 1.6×10 <sup>-13</sup> |
| 1                | 120526982             | rs1493694  | T               | C  | 0.109            | 1.09            | 2.7×10 <sup>-16</sup> |
| 1                | 150786038             | rs10305745 | A               | G  | 0.015            | 1.28            | 4.4×10 <sup>-6</sup>  |
| 1                | 177889025             | rs539515   | C               | A  | 0.198            | 1.05            | 1.6×10 <sup>-10</sup> |
| 1                | 205114873             | rs12048743 | G               | C  | 0.442            | 1.04            | 3.5×10 <sup>-9</sup>  |
| 1                | 206593900             | rs9430095  | C               | G  | 0.494            | 1.04            | 1.9×10 <sup>-8</sup>  |
| 1                | 214159256             | rs340874   | C               | T  | 0.556            | 1.07            | 1.6×10 <sup>-22</sup> |
| 1                | 219748818             | rs2820446  | C               | G  | 0.706            | 1.06            | 3.3×10 <sup>-16</sup> |
| 1                | 229672955             | rs348330   | G               | A  | 0.361            | 1.05            | 2.7×10 <sup>-14</sup> |
| 1                | 235690800             | rs291367   | G               | A  | 0.632            | 1.04            | 4.7×10 <sup>-10</sup> |
| 2                | 422144                | rs62107261 | T               | C  | 0.954            | 1.12            | 3.8×10 <sup>-12</sup> |
| 2                | 653575                | rs35913461 | C               | T  | 0.829            | 1.06            | 1.6×10 <sup>-11</sup> |
| 2                | 16574669              | rs11680058 | A               | G  | 0.863            | 1.06            | 1.4×10 <sup>-8</sup>  |
| 2                | 25643221              | rs17802463 | G               | T  | 0.731            | 1.04            | 2.9×10 <sup>-8</sup>  |
| 2                | 27730940              | rs1260326  | C               | T  | 0.607            | 1.07            | 6.5×10 <sup>-25</sup> |
| 2                | 43207872              | rs28525376 | G               | T  | 0.422            | 1.03            | 2.7×10 <sup>-6</sup>  |
| 2                | 43430440              | rs6708643  | A               | G  | 0.501            | 1.04            | 3.9×10 <sup>-8</sup>  |
| 2                | 58981064              | rs10193538 | T               | G  | 0.61             | 1.04            | 8.9×10 <sup>-9</sup>  |
| 2                | 59307725              | rs6545714  | G               | A  | 0.392            | 1.04            | 8.9×10 <sup>-9</sup>  |
| 2                | 60583665              | rs243024   | A               | G  | 0.46             | 1.06            | 2.5×10 <sup>-20</sup> |
| 2                | 65287896              | rs2249105  | A               | G  | 0.634            | 1.1             | 2.2×10 <sup>-14</sup> |
| 2                | 65355270              | rs2052261  | G               | A  | 0.304            | 1.07            | 2.5×10 <sup>-6</sup>  |
| 2                | 65655012              | rs2028150  | C               | G  | 0.598            | 1.05            | 2.3×10 <sup>-12</sup> |
| 2                | 121318166             | rs11688931 | C               | G  | 0.849            | 1.04            | 8.2×10 <sup>-6</sup>  |
| 2                | 121347612             | rs11688682 | G               | C  | 0.728            | 1.05            | 4.2×10 <sup>-9</sup>  |
| 2                | 147861633             | rs35999103 | T               | C  | 0.155            | 1.05            | 9.7×10 <sup>-9</sup>  |
| 2                | 158339550             | rs13426680 | A               | G  | 0.937            | 1.09            | 6.7×10 <sup>-10</sup> |
| 2                | 161135544             | rs3772071  | T               | C  | 0.714            | 1.05            | 1.2×10 <sup>-11</sup> |
| 2                | 165513091             | rs10195252 | T               | C  | 0.586            | 1.07            | 6.0×10 <sup>-25</sup> |
| 2                | 227101411             | rs2972144  | G               | A  | 0.639            | 1.1             | 2.1×10 <sup>-46</sup> |
| 3                | 12336507              | rs11709077 | G               | A  | 0.877            | 1.14            | 1.8×10 <sup>-36</sup> |
| 3                | 12489342              | rs17819328 | G               | T  | 0.425            | 1.06            | 4.8×10 <sup>-16</sup> |
| 3                | 23510044              | rs17013314 | G               | A  | 0.031            | 1.11            | 8.4×10 <sup>-9</sup>  |
| 3                | 46925539              | rs11926707 | C               | T  | 0.626            | 1.27            | 2.1×10 <sup>-8</sup>  |
| 3                | 47242923              | rs75423501 | G               | A  | 0.101            | 1.05            | 7.5×10 <sup>-6</sup>  |
| 3                | 49980596              | rs4688760  | T               | C  | 0.684            | 1.04            | 3.5×10 <sup>-10</sup> |
| 3                | 53127677              | rs2581787  | T               | G  | 0.563            | 1.04            | 2.4×10 <sup>-8</sup>  |
| 3                | 63962339              | rs3774723  | G               | A  | 0.844            | 1.07            | 1.6×10 <sup>-13</sup> |
| 3                | 64701146              | rs9860730  | A               | G  | 0.704            | 1.06            | 4.9×10 <sup>-15</sup> |

|   |           |             |   |   |       |      |                       |
|---|-----------|-------------|---|---|-------|------|-----------------------|
| 3 | 72865183  | rs13085136  | C | T | 0.928 | 1.08 | 1.5×10 <sup>-8</sup>  |
| 3 | 77671721  | rs2272163   | C | A | 0.618 | 1.04 | 9.6×10 <sup>-9</sup>  |
| 3 | 123065778 | rs11708067  | A | G | 0.772 | 1.09 | 5.2×10 <sup>-32</sup> |
| 3 | 124926637 | rs649961    | T | C | 0.465 | 1.04 | 9.9×10 <sup>-10</sup> |
| 3 | 152086533 | rs147579559 | A | G | 0.6   | 1.05 | 8.1×10 <sup>-13</sup> |
| 3 | 152417881 | rs74653713  | C | A | 0.957 | 1.1  | 1.2×10 <sup>-8</sup>  |
| 3 | 152433628 | rs35497231  | C | T | 0.317 | 1.04 | 7.6×10 <sup>-8</sup>  |
| 3 | 168218841 | rs7629630   | A | T | 0.857 | 1.05 | 2.5×10 <sup>-8</sup>  |
| 3 | 170733076 | rs9873618   | G | A | 0.71  | 1.07 | 4.8×10 <sup>-21</sup> |
| 3 | 183738460 | rs2872246   | A | C | 0.454 | 1.04 | 1.5×10 <sup>-8</sup>  |
| 3 | 185503456 | rs6780171   | A | T | 0.314 | 1.14 | 9.0×10 <sup>-56</sup> |
| 3 | 185541213 | rs11717959  | G | T | 0.621 | 1.04 | 3.0×10 <sup>-6</sup>  |
| 3 | 185829891 | rs1516728   | A | T | 0.759 | 1.03 | 6.3×10 <sup>-6</sup>  |
| 3 | 186665645 | rs3887925   | T | C | 0.547 | 1.07 | 3.1×10 <sup>-22</sup> |
| 3 | 186675277 | rs7645517   | A | G | 0.058 | 1.08 | 2.5×10 <sup>-8</sup>  |
| 4 | 744972    | rs1531583   | T | G | 0.046 | 1.13 | 3.5×10 <sup>-14</sup> |
| 4 | 1010077   | rs35654957  | C | T | 0.367 | 1.03 | 4.2×10 <sup>-7</sup>  |
| 4 | 1784403   | rs56337234  | C | T | 0.503 | 1.06 | 8.6×10 <sup>-18</sup> |
| 4 | 3241845   | rs362307    | T | C | 0.077 | 1.08 | 1.1×10 <sup>-9</sup>  |
| 4 | 6302519   | rs1801212   | A | G | 0.709 | 1.05 | 4.5×10 <sup>-6</sup>  |
| 4 | 6306763   | rs10937721  | C | G | 0.588 | 1.06 | 1.5×10 <sup>-8</sup>  |
| 4 | 17792869  | rs12640250  | C | A | 0.715 | 1.04 | 3.7×10 <sup>-8</sup>  |
| 4 | 45186139  | rs10938398  | A | G | 0.429 | 1.05 | 3.6×10 <sup>-12</sup> |
| 4 | 52818664  | rs2102278   | G | A | 0.319 | 1.04 | 3.7×10 <sup>-8</sup>  |
| 4 | 89740894  | rs1903002   | G | C | 0.501 | 1.04 | 2.7×10 <sup>-8</sup>  |
| 4 | 104140848 | rs1580278   | C | A | 0.473 | 1.04 | 2.2×10 <sup>-10</sup> |
| 4 | 137083193 | rs1296328   | A | C | 0.446 | 1.04 | 3.5×10 <sup>-8</sup>  |
| 4 | 153513369 | rs7669833   | T | A | 0.705 | 1.06 | 1.2×10 <sup>-14</sup> |
| 4 | 157652753 | rs28819812  | C | A | 0.677 | 1.04 | 2.2×10 <sup>-8</sup>  |
| 4 | 185717759 | rs58730668  | T | C | 0.858 | 1.07 | 1.3×10 <sup>-13</sup> |
| 5 | 14768092  | rs6885132   | C | G | 0.904 | 1.07 | 1.7×10 <sup>-8</sup>  |
| 5 | 44682589  | rs6884702   | G | A | 0.393 | 1.04 | 1.5×10 <sup>-10</sup> |
| 5 | 51791225  | rs17261179  | T | C | 0.517 | 1.04 | 1.3×10 <sup>-8</sup>  |
| 5 | 52100489  | rs3811978   | G | A | 0.167 | 1.06 | 7.7×10 <sup>-11</sup> |
| 5 | 52774510  | rs62370480  | A | G | 0.22  | 1.04 | 2.0×10 <sup>-6</sup>  |
| 5 | 53271420  | rs702634    | A | G | 0.69  | 1.05 | 7.7×10 <sup>-14</sup> |
| 5 | 53412620  | rs279744    | C | A | 0.691 | 1.04 | 3.1×10 <sup>-8</sup>  |
| 5 | 55808475  | rs465002    | T | C | 0.742 | 1.11 | 6.1×10 <sup>-38</sup> |
| 5 | 55848669  | rs2431115   | A | G | 0.402 | 1.04 | 3.9×10 <sup>-10</sup> |
| 5 | 55861595  | rs9687832   | A | G | 0.198 | 1.08 | 1.7×10 <sup>-20</sup> |
| 5 | 56196604  | rs96844     | G | A | 0.262 | 1.04 | 5.4×10 <sup>-8</sup>  |
| 5 | 67714246  | rs4976033   | G | A | 0.411 | 1.05 | 1.0×10 <sup>-9</sup>  |
| 5 | 75003678  | rs2307111   | T | C | 0.605 | 1.05 | 2.1×10 <sup>-16</sup> |

|   |           |             |   |   |       |      |                       |
|---|-----------|-------------|---|---|-------|------|-----------------------|
| 5 | 76424949  | rs4457053   | G | A | 0.304 | 1.06 | 8.4×10 <sup>-18</sup> |
| 5 | 78430607  | rs1316776   | C | A | 0.648 | 1.05 | 2.6×10 <sup>-12</sup> |
| 5 | 86577352  | rs7719891   | G | A | 0.259 | 1.04 | 2.4×10 <sup>-8</sup>  |
| 5 | 133414622 | rs244665    | A | G | 0.703 | 1.03 | 9.9×10 <sup>-6</sup>  |
| 5 | 133864599 | rs329122    | A | G | 0.429 | 1.04 | 3.6×10 <sup>-9</sup>  |
| 5 | 157928196 | rs3934712   | C | T | 0.206 | 1.05 | 3.2×10 <sup>-8</sup>  |
| 6 | 7035734   | rs112498319 | C | A | 0.409 | 1.03 | 4.2×10 <sup>-7</sup>  |
| 6 | 7255650   | rs9505097   | C | T | 0.799 | 1.05 | 8.6×10 <sup>-10</sup> |
| 6 | 20679709  | rs7756992   | G | A | 0.274 | 1.15 | 2.4×10 <sup>-88</sup> |
| 6 | 32573415  | rs601945    | G | A | 0.178 | 1.06 | 4.7×10 <sup>-8</sup>  |
| 6 | 34524698  | rs2233632   | T | C | 0.688 | 1.04 | 5.3×10 <sup>-7</sup>  |
| 6 | 40409243  | rs34298980  | T | C | 0.497 | 1.04 | 9.3×10 <sup>-10</sup> |
| 6 | 43760327  | rs11967262  | G | C | 0.486 | 1.04 | 8.8×10 <sup>-10</sup> |
| 6 | 43814190  | rs6458354   | C | T | 0.289 | 1.05 | 2.1×10 <sup>-12</sup> |
| 6 | 50788778  | rs3798519   | C | A | 0.184 | 1.06 | 2.6×10 <sup>-12</sup> |
| 6 | 51180765  | rs2465043   | G | A | 0.644 | 1.03 | 2.9×10 <sup>-6</sup>  |
| 6 | 107431688 | rs4946812   | G | A | 0.674 | 1.04 | 8.2×10 <sup>-9</sup>  |
| 6 | 126792095 | rs11759026  | G | A | 0.232 | 1.07 | 2.4×10 <sup>-18</sup> |
| 6 | 127416930 | rs2800733   | A | G | 0.717 | 1.05 | 6.0×10 <sup>-11</sup> |
| 6 | 137300960 | rs9494624   | A | G | 0.29  | 1.04 | 6.1×10 <sup>-9</sup>  |
| 6 | 140249466 | rs616279    | A | G | 0.738 | 1.04 | 6.7×10 <sup>-7</sup>  |
| 6 | 160770312 | rs474513    | A | G | 0.517 | 1.04 | 8.1×10 <sup>-10</sup> |
| 6 | 164133001 | rs4709746   | C | T | 0.868 | 1.06 | 5.8×10 <sup>-9</sup>  |
| 7 | 14898282  | rs17168486  | T | C | 0.181 | 1.07 | 2.3×10 <sup>-17</sup> |
| 7 | 15063569  | rs10228066  | T | C | 0.537 | 1.07 | 1.1×10 <sup>-28</sup> |
| 7 | 15206239  | rs2908334   | T | C | 0.631 | 1.03 | 5.9×10 <sup>-6</sup>  |
| 7 | 23434606  | rs78840640  | G | C | 0.022 | 1.11 | 2.8×10 <sup>-6</sup>  |
| 7 | 23512896  | rs4279506   | G | C | 0.61  | 1.06 | 4.8×10 <sup>-8</sup>  |
| 7 | 28198677  | rs1708302   | C | T | 0.512 | 1.1  | 1.1×10 <sup>-48</sup> |
| 7 | 30728452  | rs917195    | C | T | 0.77  | 1.05 | 4.2×10 <sup>-11</sup> |
| 7 | 44255643  | rs878521    | A | G | 0.245 | 1.06 | 1.9×10 <sup>-13</sup> |
| 7 | 102486254 | rs11496066  | T | C | 0.818 | 1.08 | 1.1×10 <sup>-8</sup>  |
| 7 | 102987583 | rs62482405  | G | T | 0.082 | 1.05 | 6.9×10 <sup>-6</sup>  |
| 7 | 103444978 | rs39328     | T | C | 0.433 | 1.04 | 3.7×10 <sup>-8</sup>  |
| 7 | 117495667 | rs6976111   | A | C | 0.313 | 1.04 | 1.2×10 <sup>-8</sup>  |
| 7 | 130027037 | rs2268382   | C | A | 0.327 | 1.03 | 7.4×10 <sup>-6</sup>  |
| 7 | 130457914 | rs1562396   | G | A | 0.319 | 1.06 | 9.9×10 <sup>-18</sup> |
| 7 | 150537635 | rs62492368  | A | G | 0.308 | 1.05 | 1.1×10 <sup>-10</sup> |
| 7 | 156930550 | rs6459733   | G | C | 0.673 | 1.06 | 2.4×10 <sup>-17</sup> |
| 8 | 9974824   | rs17689007  | G | A | 0.533 | 1.04 | 2.5×10 <sup>-9</sup>  |
| 8 | 10808687  | rs57327348  | A | T | 0.782 | 1.04 | 4.5×10 <sup>-8</sup>  |
| 8 | 30863938  | rs10954772  | T | C | 0.314 | 1.04 | 1.8×10 <sup>-9</sup>  |
| 8 | 41509915  | rs4736819   | T | C | 0.554 | 1.04 | 5.4×10 <sup>-7</sup>  |

|    |           |            |   |   |       |      |                        |
|----|-----------|------------|---|---|-------|------|------------------------|
| 8  | 110123183 | rs12680028 | C | G | 0.534 | 1.04 | 2.5×10 <sup>-8</sup>   |
| 8  | 118185025 | rs3802177  | G | A | 0.685 | 1.11 | 1.1×10 <sup>-55</sup>  |
| 8  | 128711742 | rs17772814 | G | A | 0.915 | 1.08 | 5.4×10 <sup>-10</sup>  |
| 8  | 129568078 | rs1561927  | C | T | 0.269 | 1.04 | 1.5×10 <sup>-9</sup>   |
| 8  | 145507304 | rs4977213  | C | T | 0.375 | 1.05 | 9.1×10 <sup>-14</sup>  |
| 8  | 145879883 | rs12719778 | T | C | 0.538 | 1.04 | 5.0×10 <sup>-9</sup>   |
| 9  | 3965689   | rs510807   | A | C | 0.491 | 1.03 | 1.4×10 <sup>-6</sup>   |
| 9  | 4291928   | rs10974438 | C | A | 0.357 | 1.05 | 1.5×10 <sup>-14</sup>  |
| 9  | 19067833  | rs7022807  | G | A | 0.401 | 1.04 | 2.7×10 <sup>-10</sup>  |
| 9  | 20241069  | rs7867635  | C | T | 0.412 | 1.04 | 4.0×10 <sup>-8</sup>   |
| 9  | 20662703  | rs7847880  | C | T | 0.843 | 1.04 | 2.1×10 <sup>-6</sup>   |
| 9  | 22133773  | rs76011118 | A | G | 0.034 | 1.11 | 1.4×10 <sup>-7</sup>   |
| 9  | 22134068  | rs10811660 | G | A | 0.828 | 1.27 | 1.4×10 <sup>-115</sup> |
| 9  | 22134172  | rs10757283 | T | C | 0.43  | 1.11 | 1.7×10 <sup>-41</sup>  |
| 9  | 22157908  | rs1333052  | A | C | 0.66  | 1.03 | 6.3×10 <sup>-7</sup>   |
| 9  | 28410683  | rs1412234  | C | T | 0.323 | 1.04 | 1.9×10 <sup>-10</sup>  |
| 9  | 34074476  | rs12001437 | C | T | 0.372 | 1.04 | 2.8×10 <sup>-10</sup>  |
| 9  | 81359113  | rs11137820 | C | G | 0.575 | 1.04 | 2.9×10 <sup>-8</sup>   |
| 9  | 81905590  | rs17791513 | A | G | 0.932 | 1.1  | 3.1×10 <sup>-14</sup>  |
| 9  | 84308948  | rs2796441  | G | A | 0.592 | 1.07 | 4.4×10 <sup>-24</sup>  |
| 9  | 97001682  | rs55653563 | A | C | 0.732 | 1.04 | 2.2×10 <sup>-9</sup>   |
| 9  | 136149229 | rs505922   | C | T | 0.332 | 1.05 | 3.9×10 <sup>-12</sup>  |
| 9  | 139235606 | rs78403475 | G | C | 0.896 | 1.06 | 1.2×10 <sup>-6</sup>   |
| 9  | 139241030 | rs28505901 | G | A | 0.752 | 1.09 | 6.7×10 <sup>-26</sup>  |
| 9  | 139507212 | rs11793035 | C | T | 0.331 | 1.04 | 2.2×10 <sup>-7</sup>   |
| 10 | 12307894  | rs11257655 | T | C | 0.218 | 1.09 | 1.5×10 <sup>-32</sup>  |
| 10 | 71321279  | rs177045   | G | A | 0.316 | 1.07 | 6.6×10 <sup>-18</sup>  |
| 10 | 71321658  | rs61850200 | C | G | 0.277 | 1.04 | 7.3×10 <sup>-6</sup>   |
| 10 | 71466578  | rs2642588  | G | T | 0.702 | 1.05 | 2.2×10 <sup>-14</sup>  |
| 10 | 80952826  | rs703972   | G | C | 0.533 | 1.07 | 1.7×10 <sup>-29</sup>  |
| 10 | 81096589  | rs1317617  | G | A | 0.798 | 1.04 | 1.8×10 <sup>-6</sup>   |
| 10 | 89769340  | rs11202627 | T | C | 0.152 | 1.06 | 4.7×10 <sup>-8</sup>   |
| 10 | 93924663  | rs7078559  | T | C | 0.578 | 1.03 | 4.1×10 <sup>-7</sup>   |
| 10 | 94462427  | rs10882101 | T | C | 0.587 | 1.06 | 1.4×10 <sup>-8</sup>   |
| 10 | 94479107  | rs1112718  | A | G | 0.598 | 1.06 | 5.0×10 <sup>-7</sup>   |
| 10 | 114703136 | rs7918400  | T | C | 0.476 | 1.06 | 2.0×10 <sup>-15</sup>  |
| 10 | 114757956 | rs78025551 | C | G | 0.851 | 1.05 | 1.6×10 <sup>-7</sup>   |
| 10 | 114758349 | rs7903146  | T | C | 0.295 | 1.37 | 5.8×10 <sup>-447</sup> |
| 10 | 114871594 | rs34855922 | A | G | 0.716 | 1.05 | 5.5×10 <sup>-12</sup>  |
| 10 | 122915345 | rs72631105 | A | G | 0.19  | 1.06 | 3.7×10 <sup>-9</sup>   |
| 10 | 124193181 | rs2280141  | T | G | 0.516 | 1.05 | 1.4×10 <sup>-13</sup>  |
| 11 | 1704596   | rs12802972 | A | G | 0.428 | 1.03 | 1.5×10 <sup>-6</sup>   |
| 11 | 2118860   | rs11042596 | G | T | 0.665 | 1.04 | 2.0×10 <sup>-8</sup>   |



|    |           |             |   |   |       |      |                       |
|----|-----------|-------------|---|---|-------|------|-----------------------|
| 11 | 2197286   | rs4929965   | A | G | 0.383 | 1.07 | 4.0×10 <sup>-26</sup> |
| 11 | 2372356   | rs4930091   | C | T | 0.759 | 1.04 | 3.7×10 <sup>-6</sup>  |
| 11 | 2579163   | rs2283164   | A | G | 0.947 | 1.08 | 1.2×10 <sup>-7</sup>  |
| 11 | 2691500   | rs231361    | A | G | 0.256 | 1.08 | 5.0×10 <sup>-25</sup> |
| 11 | 2755548   | rs2283220   | A | G | 0.69  | 1.05 | 1.4×10 <sup>-9</sup>  |
| 11 | 2850828   | rs234853    | G | A | 0.248 | 1.08 | 6.8×10 <sup>-16</sup> |
| 11 | 2857194   | rs2237895   | C | A | 0.426 | 1.12 | 6.0×10 <sup>-52</sup> |
| 11 | 2858546   | rs2237897   | C | T | 0.954 | 1.23 | 8.4×10 <sup>-32</sup> |
| 11 | 2908754   | rs445084    | G | A | 0.361 | 1.03 | 1.7×10 <sup>-6</sup>  |
| 11 | 17408404  | rs5213      | C | T | 0.362 | 1.07 | 3.5×10 <sup>-27</sup> |
| 11 | 28534898  | rs4923543   | A | G | 0.332 | 1.04 | 4.5×10 <sup>-8</sup>  |
| 11 | 32927778  | rs145678014 | G | T | 0.957 | 1.11 | 2.0×10 <sup>-10</sup> |
| 11 | 34642668  | rs286925    | A | G | 0.182 | 1.04 | 5.0×10 <sup>-6</sup>  |
| 11 | 34982148  | rs2767036   | C | A | 0.291 | 1.04 | 3.3×10 <sup>-8</sup>  |
| 11 | 43877934  | rs1061810   | A | C | 0.288 | 1.05 | 6.0×10 <sup>-13</sup> |
| 11 | 45912013  | rs7115753   | A | G | 0.449 | 1.04 | 3.8×10 <sup>-9</sup>  |
| 11 | 47529947  | rs7124681   | A | C | 0.41  | 1.04 | 5.1×10 <sup>-9</sup>  |
| 11 | 65294799  | rs1783541   | T | C | 0.204 | 1.06 | 2.0×10 <sup>-14</sup> |
| 11 | 68997225  | rs61881115  | G | A | 0.838 | 1.05 | 4.1×10 <sup>-7</sup>  |
| 11 | 72460398  | rs77464186  | A | C | 0.836 | 1.11 | 4.7×10 <sup>-33</sup> |
| 11 | 92708710  | rs10830963  | G | C | 0.277 | 1.1  | 4.8×10 <sup>-43</sup> |
| 11 | 128042575 | rs10893829  | T | C | 0.853 | 1.06 | 1.3×10 <sup>-10</sup> |
| 11 | 128234144 | rs10750397  | A | G | 0.282 | 1.05 | 8.3×10 <sup>-13</sup> |
| 11 | 128398938 | rs67232546  | T | C | 0.207 | 1.06 | 1.3×10 <sup>-11</sup> |
| 12 | 4031104   | rs10848958  | C | T | 0.804 | 1.04 | 1.5×10 <sup>-7</sup>  |
| 12 | 4300172   | rs11063028  | C | T | 0.18  | 1.06 | 8.5×10 <sup>-11</sup> |
| 12 | 4376089   | rs4238013   | C | T | 0.209 | 1.06 | 3.2×10 <sup>-11</sup> |
| 12 | 4399050   | rs3217860   | G | A | 0.258 | 1.05 | 3.9×10 <sup>-9</sup>  |
| 12 | 26453283  | rs718314    | G | A | 0.253 | 1.05 | 8.4×10 <sup>-11</sup> |
| 12 | 27965150  | rs10842994  | C | T | 0.805 | 1.08 | 4.1×10 <sup>-20</sup> |
| 12 | 66221060  | rs2258238   | T | A | 0.104 | 1.1  | 4.5×10 <sup>-21</sup> |
| 12 | 66358347  | rs1042725   | T | C | 0.49  | 1.05 | 1.8×10 <sup>-13</sup> |
| 12 | 71522953  | rs1796330   | G | C | 0.571 | 1.05 | 2.2×10 <sup>-14</sup> |
| 12 | 97848775  | rs77864822  | A | G | 0.932 | 1.08 | 1.1×10 <sup>-8</sup>  |
| 12 | 108629780 | rs1426371   | G | A | 0.739 | 1.05 | 8.2×10 <sup>-12</sup> |
| 12 | 118412373 | rs34965774  | A | G | 0.144 | 1.06 | 2.0×10 <sup>-9</sup>  |
| 12 | 118489636 | rs12578639  | A | T | 0.828 | 1.04 | 2.2×10 <sup>-6</sup>  |
| 12 | 121297815 | rs11065299  | A | G | 0.075 | 1.06 | 5.8×10 <sup>-7</sup>  |
| 12 | 121432117 | rs56348580  | G | C | 0.689 | 1.05 | 2.3×10 <sup>-13</sup> |
| 12 | 123450765 | rs4148856   | C | G | 0.781 | 1.05 | 1.7×10 <sup>-10</sup> |
| 12 | 124468572 | rs7978610   | G | C | 0.666 | 1.27 | 2.0×10 <sup>-8</sup>  |
| 12 | 124509177 | rs825452    | A | G | 0.603 | 1.04 | 2.4×10 <sup>-6</sup>  |
| 12 | 133069698 | rs12811407  | A | G | 0.331 | 1.05 | 1.7×10 <sup>-12</sup> |

|    |           |             |   |   |       |      |                       |
|----|-----------|-------------|---|---|-------|------|-----------------------|
| 13 | 26776999  | rs34584161  | A | G | 0.76  | 1.05 | 2.2×10 <sup>-10</sup> |
| 13 | 31042452  | rs11842871  | G | T | 0.735 | 1.04 | 1.2×10 <sup>-8</sup>  |
| 13 | 33554302  | rs576674    | G | A | 0.169 | 1.05 | 8.3×10 <sup>-10</sup> |
| 13 | 51096095  | rs963740    | A | T | 0.713 | 1.04 | 2.1×10 <sup>-8</sup>  |
| 13 | 58366634  | rs9537803   | C | T | 0.277 | 1.04 | 4.6×10 <sup>-8</sup>  |
| 13 | 58965435  | rs9569864   | C | T | 0.825 | 1.05 | 8.7×10 <sup>-8</sup>  |
| 13 | 59077406  | rs9563615   | A | T | 0.71  | 1.05 | 6.4×10 <sup>-11</sup> |
| 13 | 80717156  | rs1359790   | G | A | 0.72  | 1.09 | 2.4×10 <sup>-31</sup> |
| 13 | 109947213 | rs7987740   | T | C | 0.609 | 1.04 | 4.0×10 <sup>-8</sup>  |
| 13 | 110431626 | rs4771648   | G | A | 0.669 | 1.04 | 8.9×10 <sup>-8</sup>  |
| 14 | 23288935  | rs17122772  | G | C | 0.228 | 1.04 | 1.6×10 <sup>-8</sup>  |
| 14 | 33302882  | rs17522122  | T | G | 0.474 | 1.04 | 3.2×10 <sup>-9</sup>  |
| 14 | 38848419  | rs8017808   | G | T | 0.743 | 1.04 | 2.1×10 <sup>-8</sup>  |
| 14 | 79932041  | rs17836088  | C | G | 0.217 | 1.06 | 6.7×10 <sup>-14</sup> |
| 14 | 103894071 | rs62007683  | G | T | 0.653 | 1.04 | 3.1×10 <sup>-8</sup>  |
| 15 | 38834033  | rs8032939   | C | T | 0.246 | 1.06 | 3.5×10 <sup>-14</sup> |
| 15 | 41809205  | rs11070332  | A | G | 0.358 | 1.05 | 1.1×10 <sup>-13</sup> |
| 15 | 53091553  | rs2456530   | T | C | 0.127 | 1.06 | 5.4×10 <sup>-9</sup>  |
| 15 | 57456802  | rs117483894 | G | A | 0.037 | 1.1  | 3.9×10 <sup>-8</sup>  |
| 15 | 62394264  | rs8037894   | G | C | 0.566 | 1.05 | 2.6×10 <sup>-13</sup> |
| 15 | 63871292  | rs7178762   | C | T | 0.46  | 1.04 | 5.4×10 <sup>-10</sup> |
| 15 | 68080886  | rs4776970   | A | T | 0.641 | 1.04 | 5.0×10 <sup>-9</sup>  |
| 15 | 75932129  | rs13737     | G | T | 0.759 | 1.05 | 5.6×10 <sup>-10</sup> |
| 15 | 77818128  | rs1005752   | A | C | 0.715 | 1.08 | 2.5×10 <sup>-29</sup> |
| 15 | 90423293  | rs4932265   | T | C | 0.267 | 1.07 | 4.2×10 <sup>-20</sup> |
| 15 | 91511260  | rs12910825  | G | A | 0.361 | 1.05 | 1.6×10 <sup>-15</sup> |
| 16 | 295795    | rs6600191   | T | C | 0.825 | 1.06 | 9.3×10 <sup>-13</sup> |
| 16 | 3583173   | rs3751837   | T | C | 0.22  | 1.04 | 1.4×10 <sup>-8</sup>  |
| 16 | 28915217  | rs8046545   | G | A | 0.359 | 1.04 | 1.9×10 <sup>-8</sup>  |
| 16 | 53800954  | rs1421085   | C | T | 0.415 | 1.13 | 3.1×10 <sup>-84</sup> |
| 16 | 69651866  | rs862320    | C | T | 0.578 | 1.04 | 3.9×10 <sup>-11</sup> |
| 16 | 75234872  | rs72802342  | C | A | 0.923 | 1.17 | 4.0×10 <sup>-32</sup> |
| 16 | 75516534  | rs3115960   | G | C | 0.37  | 1.03 | 2.8×10 <sup>-6</sup>  |
| 16 | 81534790  | rs2925979   | T | C | 0.3   | 1.05 | 1.4×10 <sup>-14</sup> |
| 17 | 3828086   | rs1043246   | G | C | 0.157 | 1.05 | 7.9×10 <sup>-7</sup>  |
| 17 | 3860356   | rs3826482   | A | T | 0.576 | 1.03 | 2.1×10 <sup>-7</sup>  |
| 17 | 4045440   | rs1377807   | C | G | 0.312 | 1.05 | 4.2×10 <sup>-13</sup> |
| 17 | 7549681   | rs1641523   | C | T | 0.428 | 1.05 | 1.2×10 <sup>-10</sup> |
| 17 | 9785187   | rs7222481   | C | G | 0.324 | 1.04 | 1.4×10 <sup>-8</sup>  |
| 17 | 17661802  | rs4925109   | A | G | 0.316 | 1.05 | 2.8×10 <sup>-12</sup> |
| 17 | 36046451  | rs10962     | C | G | 0.226 | 1.05 | 9.9×10 <sup>-10</sup> |
| 17 | 36099952  | rs10908278  | T | A | 0.481 | 1.08 | 6.4×10 <sup>-36</sup> |
| 17 | 40731411  | rs34855406  | C | G | 0.277 | 1.05 | 2.3×10 <sup>-12</sup> |

|    |          |             |   |   |       |      |                       |
|----|----------|-------------|---|---|-------|------|-----------------------|
| 17 | 47060322 | rs35895680  | C | A | 0.678 | 1.06 | 2.5×10 <sup>-15</sup> |
| 17 | 61965043 | rs2727301   | T | C | 0.754 | 1.04 | 1.3×10 <sup>-6</sup>  |
| 17 | 62203304 | rs60276348  | T | C | 0.14  | 1.05 | 2.6×10 <sup>-8</sup>  |
| 17 | 65892507 | rs61676547  | C | G | 0.192 | 1.06 | 2.9×10 <sup>-11</sup> |
| 18 | 7070642  | rs7240767   | C | T | 0.376 | 1.04 | 1.6×10 <sup>-8</sup>  |
| 18 | 53452144 | rs28719468  | C | T | 0.159 | 1.04 | 1.9×10 <sup>-6</sup>  |
| 18 | 54675384 | rs17684074  | G | C | 0.74  | 1.04 | 2.9×10 <sup>-8</sup>  |
| 18 | 56876228 | rs9957145   | G | A | 0.829 | 1.05 | 8.1×10 <sup>-9</sup>  |
| 18 | 57848369 | rs523288    | T | A | 0.238 | 1.05 | 7.6×10 <sup>-13</sup> |
| 18 | 58056566 | rs74452128  | C | A | 0.976 | 1.15 | 1.0×10 <sup>-9</sup>  |
| 18 | 60668270 | rs10469140  | G | A | 0.485 | 1.03 | 6.6×10 <sup>-6</sup>  |
| 18 | 60845884 | rs12454712  | T | C | 0.614 | 1.05 | 4.6×10 <sup>-13</sup> |
| 19 | 4948862  | rs7249758   | A | G | 0.204 | 1.05 | 3.4×10 <sup>-9</sup>  |
| 19 | 7240848  | rs75253922  | C | T | 0.191 | 1.05 | 2.7×10 <sup>-8</sup>  |
| 19 | 7970635  | rs4804833   | A | G | 0.39  | 1.05 | 7.7×10 <sup>-13</sup> |
| 19 | 19388500 | rs8107974   | T | A | 0.077 | 1.1  | 3.3×10 <sup>-15</sup> |
| 19 | 33890838 | rs10406327  | C | G | 0.523 | 1.04 | 3.8×10 <sup>-8</sup>  |
| 19 | 44938870 |             | A | G | 0.001 | 1.61 | 8.3×10 <sup>-6</sup>  |
| 19 | 45411941 | rs429358    | T | C | 0.846 | 1.08 | 2.6×10 <sup>-18</sup> |
| 19 | 46157019 | rs10406431  | A | G | 0.563 | 1.05 | 9.6×10 <sup>-14</sup> |
| 19 | 46178661 | rs2238689   | C | T | 0.418 | 1.04 | 5.4×10 <sup>-9</sup>  |
| 19 | 47569003 | rs3810291   | A | G | 0.673 | 1.05 | 8.9×10 <sup>-12</sup> |
| 20 | 21466795 | rs13041756  | C | T | 0.107 | 1.06 | 1.4×10 <sup>-8</sup>  |
| 20 | 32596704 | rs2268078   | A | G | 0.657 | 1.04 | 2.3×10 <sup>-10</sup> |
| 20 | 43001721 | rs4810426   | T | C | 0.106 | 1.09 | 3.1×10 <sup>-17</sup> |
| 20 | 43042364 | rs1800961   | T | C | 0.035 | 1.18 | 2.3×10 <sup>-22</sup> |
| 20 | 43233649 | rs11696357  | A | G | 0.934 | 1.06 | 9.9×10 <sup>-6</sup>  |
| 20 | 45598564 | rs6063048   | G | A | 0.725 | 1.05 | 2.2×10 <sup>-11</sup> |
| 20 | 48832135 | rs11699802  | C | T | 0.536 | 1.04 | 1.8×10 <sup>-11</sup> |
| 20 | 51223594 | rs34454109  | A | T | 0.771 | 1.04 | 7.1×10 <sup>-9</sup>  |
| 20 | 57394628 | rs6070625   | G | C | 0.517 | 1.05 | 5.3×10 <sup>-14</sup> |
| 20 | 62450664 | rs6011155   | T | C | 0.63  | 1.04 | 6.3×10 <sup>-6</sup>  |
| 20 | 62693175 | rs59944054  | A | G | 0.238 | 1.06 | 1.5×10 <sup>-8</sup>  |
| 22 | 30609554 | rs6518681   | G | A | 0.914 | 1.09 | 1.1×10 <sup>-12</sup> |
| 22 | 32348841 | rs117001013 | C | T | 0.912 | 1.07 | 1.7×10 <sup>-8</sup>  |
| 22 | 41489920 | rs5758223   | A | G | 0.717 | 1.04 | 3.8×10 <sup>-8</sup>  |
| 22 | 44324730 | rs738408    | T | C | 0.226 | 1.05 | 1.4×10 <sup>-10</sup> |
| 22 | 50356850 | rs1801645   | C | T | 0.275 | 1.04 | 1.5×10 <sup>-8</sup>  |

<sup>a</sup> Chr is chromosome.

<sup>b</sup> Position is in base pairs (bp) on Genome Reference Consortium Human Build 37.

<sup>c</sup> A1 and a2 are the alleles from AGEN 2020, with the effect allele given first.

<sup>d</sup> A1f is the frequency of a1 in the DIAGRAM 2018 study population.

<sup>e</sup> OR is reported per copy of the effect allele.

**Table S5. SNPs included in the PSs derived from various ancestry-specific GWAS meta-analyses in DIAMANTE 2022<sup>9</sup> (including the population-specific weight PS).**

| chr <sup>a</sup> | position <sup>b</sup> | SNP        | a1/a2 <sup>c</sup> | OR_comp <sup>d</sup> | OR_afr | OR_eas | OR_eur | OR_his | OR_sas | freq_pop <sup>e</sup> | OR_pop <sup>f</sup> | p-value              |
|------------------|-----------------------|------------|--------------------|----------------------|--------|--------|--------|--------|--------|-----------------------|---------------------|----------------------|
| 1                | 20729451              | rs10916784 | G/C                | 1.03                 | 1.03   | 1.03   | 1.03   | 1.02   | 1.06   | 0.49                  | 1.05                | 3.1×10 <sup>-1</sup> |
| 1                | 39870793              | rs3768301  | T/C                | 1.07                 | 1.08   | 1.06   | 1.08   | 1.04   | 1.05   | 0.30                  | 1.06                | 2.6×10 <sup>-1</sup> |
| 1                | 46358862              | rs34444543 | G/A                | 1.04                 | 1.02   | 1.06   | 1.03   | 1.01   | 1.02   | 0.61                  | 1.05                | 3.0×10 <sup>-1</sup> |
| 1                | 64114429              | rs11576729 | G/T                | 1.05                 | 1.08   | 1.06   | 1.04   | 1.09   | 1.03   | 0.50                  | 1.04                | 3.6×10 <sup>-1</sup> |
| 1                | 117532790             | rs1127215  | C/T                | 1.04                 | 1.02   | 1.02   | 1.05   | 1.06   | 1.05   | 0.21                  | 0.96                | 4.7×10 <sup>-1</sup> |
| 1                | 120455586             | rs835576   | C/T                | 1.07                 | 1.03   | 1.09   | 1.08   | 1.09   | 1.03   | 0.10                  | 0.94                | 4.6×10 <sup>-1</sup> |
| 1                | 177889025             | rs539515   | C/A                | 1.06                 | 1.04   | 1.06   | 1.06   | 1.06   | 1.03   | 0.20                  | 1.03                | 5.4×10 <sup>-1</sup> |
| 1                | 200416099             | rs10919928 | A/G                | 1.03                 | 0.77   | 1.04   | 1.15   | 1.14   | 0.98   | 0.13                  | 1.13                | 9.1×10 <sup>-2</sup> |
| 1                | 204539291             | rs6689629  | A/G                | 1.04                 | 1.05   | 1.04   | 1.03   | 1.03   | 1.04   | 0.98                  | 0.93                | 6.7×10 <sup>-1</sup> |
| 1                | 205107793             | rs12039805 | A/G                | 1.03                 | 1.03   | 1.02   | 1.04   | 1.06   | 1.01   | 0.39                  | 1.03                | 6.0×10 <sup>-1</sup> |
| 1                | 206600992             | rs9429893  | A/G                | 1.03                 | 1.08   | 1.02   | 1.04   | 1.02   | 1.03   | 0.48                  | 1.03                | 5.5×10 <sup>-1</sup> |
| 1                | 214159256             | rs340874   | C/T                | 1.05                 | 1.01   |        | 1.06   | 1.04   | 1.04   | 0.35                  | 1.04                | 4.2×10 <sup>-1</sup> |
| 1                | 219748818             | rs2820446  | C/G                | 1.05                 | 1.06   | 1.03   | 1.06   | 1.02   | 1.03   | 0.38                  | 1.06                | 1.8×10 <sup>-1</sup> |
| 1                | 229672955             | rs348330   | G/A                | 1.05                 | 1.02   | 1.06   | 1.05   | 1.03   | 1.02   | 0.68                  | 1.01                | 8.0×10 <sup>-1</sup> |
| 2                | 422144                | rs62107261 | T/C                | 1.11                 | 1.11   |        | 1.11   | 1.12   | 0.97   | 0.99                  | 1.35                | 1.9×10 <sup>-1</sup> |
| 2                | 653874                | rs10188334 | C/T                | 1.06                 | 1.11   |        | 1.05   | 1.07   | 1.10   | 0.85                  | 1.07                | 3.2×10 <sup>-1</sup> |
| 2                | 25533568              | rs55928417 | G/T                | 1.03                 | 0.99   | 1.03   | 1.04   | 1.04   | 1.05   | 0.84                  | 1.06                | 4.1×10 <sup>-1</sup> |
| 2                | 27730940              | rs1260326  | C/T                | 1.06                 | 1.07   | 1.06   | 1.07   | 1.03   | 1.08   | 0.90                  | 1.07                | 5.3×10 <sup>-1</sup> |
| 2                | 45192080              | rs12712928 | C/G                | 1.01                 | 0.95   | 1.07   | 0.97   | 0.95   | 1.00   | 0.35                  | 0.91                | 8.8×10 <sup>-2</sup> |
| 2                | 60586707              | rs243018   | G/C                | 1.06                 | 1.09   | 1.06   | 1.06   | 1.06   | 1.05   | 0.74                  | 1.02                | 6.8×10 <sup>-1</sup> |
| 2                | 65284231              | rs2540949  | A/T                | 1.03                 | 1.03   | 1.02   | 1.04   | 1.03   | 1.02   | 0.79                  | 1.10                | 1.3×10 <sup>-1</sup> |
| 2                | 65666674              | rs6752053  | T/C                | 1.05                 | 1.04   | 1.05   | 1.05   | 1.05   | 1.05   | 0.73                  | 0.93                | 1.9×10 <sup>-1</sup> |
| 2                | 121347612             | rs11688682 | G/C                | 1.06                 | 1.02   | 1.01   | 1.06   | 1.05   | 1.06   | 0.99                  | 1.47                | 3.0×10 <sup>-1</sup> |
| 2                | 121440218             | rs10864859 | T/G                | 1.06                 | 1.03   | 1.04   | 1.06   | 1.05   | 1.13   | 0.65                  | 1.02                | 7.1×10 <sup>-1</sup> |
| 2                | 158390468             | rs7594480  | T/C                | 1.08                 | 1.07   | 0.99   | 1.08   | 1.10   | 1.09   | 0.84                  | 0.98                | 7.7×10 <sup>-1</sup> |
| 2                | 161144055             | rs1020731  | A/G                | 1.03                 | 1.04   | 1.02   | 1.04   | 1.06   | 0.98   | 0.94                  | 1.14                | 1.6×10 <sup>-1</sup> |
| 2                | 163649480             | rs12614955 | T/C                | 1.03                 | 1.05   | 1.03   | 1.03   | 1.01   | 1.04   | 0.60                  | 0.96                | 3.5×10 <sup>-1</sup> |

|   |           |            |     |      |      |      |      |      |      |      |      |                       |
|---|-----------|------------|-----|------|------|------|------|------|------|------|------|-----------------------|
| 2 | 165508389 | rs10184004 | C/T | 1.07 | 1.11 | 1.05 | 1.06 | 1.08 | 1.09 | 0.97 | 1.14 | 3.8×10 <sup>-1</sup>  |
| 2 | 213818731 | rs16849467 | T/C | 1.04 | 1.06 | 1.04 | 1.03 | 1.02 | 1.05 | 0.97 | 0.98 | 8.5×10 <sup>-1</sup>  |
| 2 | 227100490 | rs2943648  | G/A | 1.09 | 1.08 | 1.05 | 1.10 | 1.07 | 1.08 | 0.99 | 1.08 | 7.3×10 <sup>-1</sup>  |
| 3 | 12329783  | rs17036160 | C/T | 1.12 | 1.09 | 1.12 | 1.12 | 1.12 | 1.12 | 0.91 | 1.18 | 4.6×10 <sup>-2*</sup> |
| 3 | 12490951  | rs4684855  | T/C | 1.04 | 1.11 | 1.03 | 1.05 | 1.03 | 1.01 | 0.40 | 1.07 | 1.5×10 <sup>-1</sup>  |
| 3 | 23457080  | rs13094957 | T/C | 1.07 | 1.02 | 1.11 | 1.07 | 1.05 | 1.08 | 0.95 | 0.99 | 8.2×10 <sup>-1</sup>  |
| 3 | 23632174  | rs76435632 | G/C | 1.10 | 1.21 | 1.11 | 1.11 | 1.08 | 1.08 | 0.12 | 1.07 | 2.9×10 <sup>-1</sup>  |
| 3 | 50174197  | rs2624847  | G/T | 1.03 | 0.97 | 1.04 | 1.04 | 1.04 | 1.00 | 0.13 | 1.07 | 3.6×10 <sup>-1</sup>  |
| 3 | 58338809  | rs12629058 | T/C | 1.04 | 1.13 | 1.04 | 1.03 | 1.05 | 1.06 | 0.16 | 1.04 | 6.6×10 <sup>-1</sup>  |
| 3 | 63897215  | rs2292662  | C/T | 1.06 | 1.02 | 1.09 | 1.07 | 1.01 | 1.01 | 0.98 | 1.01 | 9.0×10 <sup>-1</sup>  |
| 3 | 64703394  | rs66815886 | G/T | 1.04 | 1.05 | 1.01 | 1.05 | 1.03 | 1.03 | 0.96 | 0.84 | 2.7×10 <sup>-1</sup>  |
| 3 | 114960798 | rs1459513  | C/A | 1.05 | 0.98 | 1.06 | 1.06 | 1.06 | 1.01 | 0.16 | 1.00 | 6.3×10 <sup>-1</sup>  |
| 3 | 123065778 | rs11708067 | A/G | 1.10 | 1.13 | 1.18 | 1.09 | 1.13 | 1.11 | 0.54 | 1.03 | 6.5×10 <sup>-1</sup>  |
| 3 | 124921457 | rs9873519  | T/C | 1.04 | 1.05 | 1.04 | 1.04 | 1.01 | 1.05 | 0.29 | 1.01 | 8.4×10 <sup>-1</sup>  |
| 3 | 151998053 | rs1426385  | A/G | 1.04 | 1.05 | 1.02 | 1.04 | 1.02 | 1.05 | 0.42 | 1.03 | 5.0×10 <sup>-1</sup>  |
| 3 | 152399693 | rs10935897 | A/G | 1.03 | 1.04 | 1.03 | 1.04 | 1.06 | 1.01 | 0.18 | 0.93 | 2.2×10 <sup>-1</sup>  |
| 3 | 152530027 | rs75417759 | C/T | 1.07 | 1.07 | 0.96 | 1.11 | 1.11 | 1.06 | 0.98 | 1.07 | 7.1×10 <sup>-1</sup>  |
| 3 | 170724883 | rs8192675  | T/C | 1.06 | 0.97 | 1.06 | 1.07 | 1.01 | 1.05 | 0.76 | 1.08 | 1.7×10 <sup>-1</sup>  |
| 3 | 185510613 | rs7633675  | G/T | 1.12 | 1.13 | 1.14 | 1.12 | 1.16 | 1.12 | 0.18 | 1.07 | 2.8×10 <sup>-1</sup>  |
| 3 | 186665645 | rs3887925  | T/C | 1.05 | 1.03 | 1.04 | 1.06 | 1.05 | 1.05 | 0.14 | 1.09 | 2.0×10 <sup>-1</sup>  |
| 3 | 186676455 | rs9799068  | A/C | 1.04 | 1.03 | 1.03 | 1.06 | 1.03 | 1.03 | 0.15 | 1.01 | 6.6×10 <sup>-1</sup>  |
| 3 | 195825077 | rs74289356 | T/C | 1.05 | 1.07 | 1.06 | 1.04 | 1.06 | 1.01 | 0.41 | 0.96 | 5.4×10 <sup>-1</sup>  |
| 4 | 1240299   | rs730831   | T/G | 1.09 | 1.09 | 1.11 | 1.08 | 1.11 | 1.04 | 0.53 | 1.02 | 7.6×10 <sup>-1</sup>  |
| 4 | 1784605   | rs6831006  | G/C | 1.06 | 1.02 | 1.07 | 1.06 | 1.04 | 1.04 | 0.31 | 0.99 | 7.4×10 <sup>-1</sup>  |
| 4 | 6293237   | rs9998835  | G/C | 1.08 | 0.99 | 1.12 | 1.09 | 1.13 | 1.06 | 0.94 | 1.05 | 6.5×10 <sup>-1</sup>  |
| 4 | 18047401  | rs6855926  | A/G | 1.04 | 1.07 | 1.03 | 1.04 | 1.02 | 1.06 | 0.66 | 1.05 | 4.1×10 <sup>-1</sup>  |
| 4 | 45175691  | rs13130484 | T/C | 1.04 | 1.08 | 1.03 | 1.04 | 1.04 | 1.02 | 0.30 | 1.13 | 1.8×10 <sup>-2*</sup> |
| 4 | 71835822  | rs7674402  | A/G | 1.06 | 1.04 | 1.07 | 1.06 | 1.06 | 1.06 | 0.15 | 1.03 | 6.2×10 <sup>-1</sup>  |
| 4 | 83587562  | rs10471048 | G/C | 1.03 | 1.05 | 1.02 | 1.04 | 1.01 | 1.04 | 0.23 | 0.96 | 5.1×10 <sup>-1</sup>  |
| 4 | 102135363 | rs2659518  | A/G | 1.04 | 1.06 | 1.03 | 1.05 | 1.07 | 1.03 | 0.40 | 1.07 | 1.7×10 <sup>-1</sup>  |
| 4 | 103725894 | rs223423   | G/A | 1.02 | 1.04 | 1.00 | 1.04 | 1.07 | 0.98 | 0.30 | 1.03 | 5.6×10 <sup>-1</sup>  |

|   |           |            |     |      |      |      |      |      |      |      |      |                       |
|---|-----------|------------|-----|------|------|------|------|------|------|------|------|-----------------------|
| 4 | 106048291 | rs17035289 | C/T | 1.04 | 1.07 | 1.04 | 1.04 | 1.10 | 1.00 | 0.22 | 1.03 | 5.9×10 <sup>-1</sup>  |
| 4 | 153520475 | rs6813195  | C/T | 1.06 | 1.08 | 1.07 | 1.06 | 1.08 | 1.06 | 0.53 | 1.10 | 5.3×10 <sup>-2</sup>  |
| 4 | 157725916 | rs1425482  | T/C | 1.03 | 1.06 | 1.00 | 1.04 | 1.09 | 1.02 | 0.69 | 1.06 | 2.2×10 <sup>-1</sup>  |
| 5 | 14780521  | rs30614    | A/G | 1.04 | 1.07 |      | 1.04 | 1.07 | 1.05 | 0.23 | 0.95 | 3.5×10 <sup>-1</sup>  |
| 5 | 44682589  | rs6884702  | G/A | 1.03 | 0.99 | 1.02 | 1.04 | 1.06 | 1.02 | 0.52 | 1.00 | 8.4×10 <sup>-1</sup>  |
| 5 | 51791225  | rs17261179 | T/C | 1.03 | 1.05 | 1.03 | 1.04 | 1.03 | 1.02 | 0.77 | 0.99 | 7.8×10 <sup>-1</sup>  |
| 5 | 53271420  | rs702634   | A/G | 1.04 | 1.04 | 1.04 | 1.04 | 1.03 | 1.02 | 0.96 | 0.89 | 3.9×10 <sup>-1</sup>  |
| 5 | 53303595  | rs6876198  | C/T | 1.04 | 1.07 | 1.02 | 1.04 | 1.07 | 1.04 | 0.24 | 1.00 | 8.9×10 <sup>-1</sup>  |
| 5 | 55810305  | rs256904   | T/A | 1.08 | 1.11 | 1.09 | 1.09 | 1.07 | 1.05 | 0.77 | 1.17 | 8.7×10 <sup>-3*</sup> |
| 5 | 55840633  | rs42251    | A/G | 1.03 | 1.00 | 1.03 | 1.04 | 1.06 | 1.03 | 0.25 | 1.13 | 2.6×10 <sup>-2*</sup> |
| 5 | 55860866  | rs3936510  | T/G | 1.08 | 1.02 | 1.08 | 1.09 | 1.13 | 1.07 | 0.08 | 1.08 | 4.4×10 <sup>-1</sup>  |
| 5 | 67716793  | rs57634870 | G/T | 1.04 | 1.04 | 1.04 | 1.04 | 1.04 | 1.05 | 0.23 | 0.99 | 7.3×10 <sup>-1</sup>  |
| 5 | 75003678  | rs2307111  | T/C | 1.04 | 1.12 | 1.00 | 1.05 | 1.05 | 1.02 | 0.76 | 1.03 | 6.4×10 <sup>-1</sup>  |
| 5 | 76435004  | rs7732130  | G/A | 1.06 | 1.15 | 1.08 | 1.06 | 1.04 | 1.03 | 0.35 | 1.11 | 4.1×10 <sup>-2*</sup> |
| 5 | 78472599  | rs10052346 | G/T | 1.04 | 1.08 | 1.02 | 1.04 | 1.07 | 1.02 | 0.47 | 0.96 | 4.5×10 <sup>-1</sup>  |
| 5 | 122704342 | rs4267865  | G/T | 1.08 | 1.18 | 1.06 | 1.08 | 1.07 | 1.12 | 0.86 | 1.13 | 7.2×10 <sup>-2</sup>  |
| 5 | 133864599 | rs329122   | A/G | 1.04 | 1.01 | 1.04 | 1.04 | 1.07 | 1.06 | 0.80 | 1.06 | 3.4×10 <sup>-1</sup>  |
| 5 | 176589585 | rs244708   | G/A | 1.03 | 1.02 | 1.04 | 1.02 | 1.06 | 1.01 | 0.45 | 1.11 | 4.9×10 <sup>-2*</sup> |
| 6 | 20680678  | rs9348441  | A/T | 1.17 | 1.08 | 1.23 | 1.15 | 1.09 | 1.12 | 0.28 | 1.13 | 1.7×10 <sup>-2*</sup> |
| 6 | 31139452  | rs879882   | C/T | 1.04 | 0.97 | 1.05 | 1.04 | 1.07 |      | 0.60 | 1.02 | 6.2×10 <sup>-1</sup>  |
| 6 | 32373378  | rs3806155  | T/A | 1.19 | 0.99 | 1.19 | 1.19 | 0.78 |      | 0.01 | 0.56 | 1.1×10 <sup>-1</sup>  |
| 6 | 32439077  | rs7452864  | C/T | 1.04 | 1.14 | 1.00 | 1.05 | 1.02 |      | 0.97 | 1.10 | 6.6×10 <sup>-1</sup>  |
| 6 | 33524820  | rs62405954 | T/C | 1.10 | 1.17 | 1.05 | 1.11 | 1.08 |      | 0.81 | 0.98 | 7.5×10 <sup>-1</sup>  |
| 6 | 34214670  | rs4711389  | A/G | 1.08 | 1.30 | 1.13 | 1.05 | 1.07 |      | 0.51 | 1.06 | 2.9×10 <sup>-1</sup>  |
| 6 | 38992668  | rs2281342  | T/C | 1.03 | 1.08 | 1.03 | 1.03 | 1.09 | 1.01 | 0.80 | 1.03 | 7.0×10 <sup>-1</sup>  |
| 6 | 39046644  | rs742762   | A/C | 1.04 | 1.02 | 1.08 | 1.01 | 1.08 | 0.98 | 0.73 | 1.01 | 7.6×10 <sup>-1</sup>  |
| 6 | 39284184  | rs3734618  | G/A | 1.04 | 1.05 | 1.07 | 1.03 | 1.05 | 1.05 | 0.15 | 1.17 | 2.6×10 <sup>-2*</sup> |
| 6 | 40409243  | rs34298980 | T/C | 1.03 | 1.01 | 1.02 | 1.04 | 1.07 | 1.02 | 0.41 | 1.06 | 2.8×10 <sup>-1</sup>  |
| 6 | 43758873  | rs6905288  | A/G | 1.04 | 1.03 | 1.03 | 1.04 | 1.04 | 1.04 | 0.83 | 1.13 | 5.9×10 <sup>-2</sup>  |
| 6 | 43814190  | rs6458354  | C/T | 1.04 | 1.03 | 1.04 | 1.05 | 1.05 | 0.99 | 0.06 | 1.01 | 8.2×10 <sup>-1</sup>  |
| 6 | 50788778  | rs3798519  | C/A | 1.06 | 1.04 | 1.05 | 1.06 | 1.07 | 1.05 | 0.56 | 1.07 | 1.3×10 <sup>-1</sup>  |

|   |           |            |     |      |      |      |      |      |      |      |      |                       |
|---|-----------|------------|-----|------|------|------|------|------|------|------|------|-----------------------|
| 6 | 107433400 | rs1665901  | A/T | 1.04 | 1.00 | 1.04 | 1.04 | 1.02 | 1.03 | 0.66 | 0.98 | 6.7×10 <sup>-1</sup>  |
| 6 | 118011723 | rs72951506 | C/T | 1.04 | 1.11 | 1.05 | 1.04 | 1.00 | 1.03 | 0.73 | 1.12 | 3.9×10 <sup>-2*</sup> |
| 6 | 126792095 | rs11759026 | G/A | 1.07 | 1.12 | 1.06 | 1.07 | 1.11 | 1.07 | 0.77 | 1.03 | 6.1×10 <sup>-1</sup>  |
| 6 | 127416930 | rs2800733  | A/G | 1.05 | 1.04 | 1.07 | 1.05 | 1.05 | 1.04 | 0.84 | 1.03 | 6.5×10 <sup>-1</sup>  |
| 6 | 131954797 | rs7739842  | G/T | 1.04 | 0.98 | 1.05 | 1.03 | 1.07 | 1.04 | 0.40 | 1.06 | 2.7×10 <sup>-1</sup>  |
| 6 | 137291281 | rs6937795  | A/C | 1.04 | 0.98 | 1.04 | 1.05 | 1.01 | 1.02 | 0.63 | 1.02 | 6.6×10 <sup>-1</sup>  |
| 6 | 138855975 | rs9376353  | A/T | 1.03 | 1.03 | 1.03 | 1.03 | 1.00 | 1.07 | 0.57 | 0.99 | 7.7×10 <sup>-1</sup>  |
| 6 | 143058692 | rs6570526  | G/C | 1.03 | 1.03 | 1.03 | 1.03 | 1.04 | 1.02 | 0.49 | 0.98 | 7.1×10 <sup>-1</sup>  |
| 6 | 153438573 | rs6932473  | T/A | 1.04 | 1.01 | 1.04 | 1.04 | 1.06 | 1.03 | 0.28 | 1.07 | 2.1×10 <sup>-1</sup>  |
| 6 | 160770360 | rs539298   | A/G | 1.04 | 1.05 | 1.03 | 1.04 | 1.02 | 1.07 | 0.63 | 0.95 | 2.8×10 <sup>-1</sup>  |
| 6 | 164133001 | rs4709746  | C/T | 1.05 | 1.02 | 1.05 | 1.06 | 1.04 | 0.99 | 0.50 | 1.09 | 6.1×10 <sup>-2</sup>  |
| 7 | 13887008  | rs12154701 | A/C | 1.03 | 1.03 | 1.05 | 1.02 | 1.02 | 1.02 | 0.26 | 1.07 | 2.6×10 <sup>-1</sup>  |
| 7 | 14898282  | rs17168486 | T/C | 1.06 | 1.01 | 1.07 | 1.07 | 1.05 | 1.05 | 0.83 | 1.05 | 5.1×10 <sup>-1</sup>  |
| 7 | 15062983  | rs2215383  | C/T | 1.07 | 1.08 | 1.07 | 1.07 | 1.06 | 1.08 | 0.24 | 0.98 | 8.2×10 <sup>-1</sup>  |
| 7 | 28192280  | rs849133   | C/T | 1.05 | 1.08 |      | 1.04 | 1.11 | 1.06 | 0.76 | 1.05 | 3.5×10 <sup>-1</sup>  |
| 7 | 28205303  | rs552707   | T/C | 1.03 | 1.04 |      | 1.04 | 1.01 | 1.00 | 0.01 | 0.76 | 2.1×10 <sup>-1</sup>  |
| 7 | 30728452  | rs917195   | C/T | 1.05 | 1.04 | 1.04 | 1.05 | 1.08 | 1.05 | 0.59 | 0.98 | 6.5×10 <sup>-1</sup>  |
| 7 | 44178829  | rs882019   | G/A | 1.03 | 1.07 | 1.04 | 1.03 | 1.01 | 1.01 | 0.52 | 1.02 | 7.6×10 <sup>-1</sup>  |
| 7 | 44255643  | rs878521   | A/G | 1.04 | 1.05 | 1.03 | 1.06 | 1.04 | 1.04 | 0.59 | 0.94 | 2.1×10 <sup>-1</sup>  |
| 7 | 50809085  | rs13236710 | G/A | 1.05 | 1.05 | 1.06 | 1.05 | 1.09 | 0.97 | 0.93 | 1.02 | 8.8×10 <sup>-1</sup>  |
| 7 | 69055951  | rs2533457  | G/A | 1.04 | 1.06 | 1.06 | 1.03 | 1.03 | 1.07 | 0.27 | 1.03 | 6.3×10 <sup>-1</sup>  |
| 7 | 89800241  | rs6978118  | A/T | 1.03 | 1.05 | 1.07 | 1.02 | 1.04 | 1.01 | 0.39 | 1.07 | 1.9×10 <sup>-1</sup>  |
| 7 | 102481891 | rs7781557  | C/T | 1.05 | 1.10 | 1.19 | 1.05 | 1.06 | 1.02 | 0.99 | 0.94 | 7.9×10 <sup>-1</sup>  |
| 7 | 130457914 | rs1562396  | G/A | 1.04 | 1.01 | 1.03 | 1.06 | 1.04 | 1.00 | 0.33 | 1.06 | 2.6×10 <sup>-1</sup>  |
| 7 | 140631823 | rs11983228 | C/G | 1.05 | 1.04 | 1.07 | 1.05 | 1.06 | 1.06 | 0.01 | 1.78 | 5.5×10 <sup>-2</sup>  |
| 7 | 150537635 | rs62492368 | A/G | 1.03 | 1.00 | 1.03 | 1.04 | 1.03 | 1.01 | 0.53 | 0.97 | 6.0×10 <sup>-1</sup>  |
| 7 | 156794983 | rs887609   | A/G | 1.03 | 1.01 | 1.06 | 1.02 | 1.10 | 0.99 | 0.25 | 1.01 | 7.8×10 <sup>-1</sup>  |
| 7 | 156992461 | rs2366214  | A/G | 1.05 | 1.06 | 1.04 | 1.06 | 1.05 | 1.03 | 0.48 | 1.05 | 3.2×10 <sup>-1</sup>  |
| 8 | 10787612  | rs4240673  | T/C | 1.04 | 1.03 | 1.00 | 1.04 | 1.02 | 1.05 | 0.89 | 0.99 | 8.5×10 <sup>-1</sup>  |
| 8 | 12618225  | rs12680692 | A/T | 1.03 | 1.05 | 1.01 | 1.04 | 1.02 | 1.06 | 0.65 | 1.04 | 4.7×10 <sup>-1</sup>  |
| 8 | 36854711  | rs10092900 | G/T | 1.04 | 1.06 | 1.04 | 1.03 | 1.03 | 1.06 | 0.16 | 1.05 | 4.3×10 <sup>-1</sup>  |

|    |           |             |     |      |      |      |      |      |      |      |      |                       |
|----|-----------|-------------|-----|------|------|------|------|------|------|------|------|-----------------------|
| 8  | 37397803  | rs12680217  | T/C | 1.05 | 1.09 | 1.06 | 1.05 | 0.98 | 1.05 | 0.53 | 1.02 | 8.3×10 <sup>-1</sup>  |
| 8  | 41510260  | rs12550613  | C/G | 1.04 | 1.07 | 1.05 | 1.03 | 1.01 | 1.04 | 0.72 | 0.96 | 4.6×10 <sup>-1</sup>  |
| 8  | 41522991  | rs508419    | G/A | 1.05 | 1.03 | 1.07 | 1.05 | 1.06 | 1.06 | 0.92 | 0.98 | 7.7×10 <sup>-1</sup>  |
| 8  | 95965695  | rs13257021  | A/G | 1.04 | 0.99 | 1.05 | 1.05 | 1.06 | 1.02 | 0.40 | 0.98 | 7.4×10 <sup>-1</sup>  |
| 8  | 116497173 | rs800909    | T/C | 1.03 | 1.08 | 1.02 | 1.03 | 1.06 | 1.02 | 0.26 | 1.06 | 2.7×10 <sup>-1</sup>  |
| 8  | 118184783 | rs13266634  | C/T | 1.12 | 1.08 | 1.13 | 1.11 | 1.10 | 1.11 | 0.87 | 1.15 | 5.9×10 <sup>-2</sup>  |
| 8  | 129569999 | rs4733612   | G/A | 1.04 | 1.02 | 1.08 | 1.04 | 1.08 | 1.03 | 0.03 | 1.24 | 2.3×10 <sup>-1</sup>  |
| 8  | 145544720 | rs3890400   | A/G | 1.04 | 1.04 | 1.04 | 1.05 | 1.04 | 1.04 | 0.11 | 1.03 | 6.8×10 <sup>-1</sup>  |
| 8  | 145972670 | rs7014773   | T/C | 1.03 | 1.06 | 1.04 | 1.03 | 1.03 | 0.99 | 0.65 | 0.98 | 6.0×10 <sup>-1</sup>  |
| 9  | 4290085   | rs4237150   | C/G | 1.05 | 1.01 | 1.06 | 1.04 | 1.09 | 1.07 | 0.68 | 1.12 | 2.8×10 <sup>-2*</sup> |
| 9  | 4297892   | rs4258054   | T/C | 1.03 | 1.00 | 1.03 | 1.04 | 1.03 | 1.01 | 0.24 | 0.91 | 9.6×10 <sup>-2</sup>  |
| 9  | 19074538  | rs12380322  | G/A | 1.03 | 0.99 | 1.03 | 1.04 | 1.00 | 1.03 | 0.23 | 1.04 | 4.4×10 <sup>-1</sup>  |
| 9  | 21840834  | rs7856455   | G/T | 1.04 | 0.98 | 1.04 | 1.10 | 1.01 | 1.03 | 0.76 | 1.03 | 6.8×10 <sup>-1</sup>  |
| 9  | 22133984  | rs10757282  | C/T | 1.08 | 1.05 | 1.06 | 1.09 | 1.08 | 1.06 | 0.40 | 1.07 | 1.4×10 <sup>-1</sup>  |
| 9  | 22134094  | rs10811661  | T/C | 1.17 | 1.08 | 1.16 | 1.19 | 1.15 | 1.20 | 0.92 | 1.22 | 3.2×10 <sup>-2*</sup> |
| 9  | 28410683  | rs1412234   | C/T | 1.03 | 1.07 | 1.01 | 1.04 | 1.02 | 1.06 | 0.22 | 0.98 | 6.5×10 <sup>-1</sup>  |
| 9  | 34074476  | rs12001437  | C/T | 1.03 | 1.00 | 1.03 | 1.04 | 1.03 | 1.00 | 0.47 | 1.03 | 4.5×10 <sup>-1</sup>  |
| 9  | 81914978  | rs13290396  | C/T | 1.10 | 1.12 | 1.12 | 1.10 | 1.09 | 1.10 | 0.70 | 1.09 | 8.6×10 <sup>-2</sup>  |
| 9  | 83998346  | rs9332453   | C/T | 1.03 | 0.98 | 1.05 | 1.02 | 1.02 | 1.06 | 0.73 | 1.02 | 7.4×10 <sup>-1</sup>  |
| 9  | 84308948  | rs2796441   | G/A | 1.07 | 1.01 | 1.08 | 1.07 | 1.06 | 1.05 | 0.45 | 1.03 | 4.9×10 <sup>-1</sup>  |
| 9  | 96971175  | rs12345069  | C/T | 1.04 | 1.05 | 1.01 | 1.04 | 1.07 | 1.04 | 0.98 | 1.00 | 8.9×10 <sup>-1</sup>  |
| 9  | 98278413  | rs113154802 | C/T | 1.05 | 1.05 | 1.07 | 1.03 | 1.24 | 1.08 | 0.97 | 1.12 | 3.8×10 <sup>-1</sup>  |
| 9  | 126015103 | rs2416899   | T/G | 1.03 | 0.97 | 1.03 | 1.05 | 0.99 | 1.08 | 0.28 | 0.97 | 5.6×10 <sup>-1</sup>  |
| 9  | 136149229 | rs505922    | C/T | 1.05 | 1.02 | 1.05 | 1.05 | 1.09 | 1.02 | 0.11 | 0.94 | 4.5×10 <sup>-1</sup>  |
| 9  | 139243334 | rs28429551  | A/T | 1.09 | 1.08 | 1.16 | 1.08 | 1.08 | 1.10 | 0.72 | 1.14 | 1.9×10 <sup>-2*</sup> |
| 9  | 139247229 | rs74604683  | C/T | 1.05 | 1.23 | 1.06 | 1.05 | 1.08 | 1.03 | 0.87 | 0.97 | 7.8×10 <sup>-1</sup>  |
| 10 | 12307894  | rs11257655  | T/C | 1.11 | 1.09 | 1.13 | 1.09 | 1.15 | 1.10 | 0.41 | 1.08 | 1.2×10 <sup>-1</sup>  |
| 10 | 26497704  | rs7923442   | A/G | 1.04 | 1.04 | 1.04 | 1.03 | 1.03 | 1.05 | 0.81 | 1.07 | 2.2×10 <sup>-1</sup>  |
| 10 | 64974380  | rs41274074  | G/C | 1.06 | 0.99 | 1.07 | 1.08 | 1.00 | 0.98 | 0.78 | 1.03 | 6.2×10 <sup>-1</sup>  |
| 10 | 71320943  | rs190925    | A/G | 1.04 | 0.95 | 1.06 | 1.05 | 1.03 | 1.06 | 0.36 | 0.92 | 9.9×10 <sup>-2</sup>  |
| 10 | 71466578  | rs2642588   | G/T | 1.05 | 0.99 | 1.16 | 1.05 | 1.01 | 1.07 | 0.70 | 1.00 | 8.6×10 <sup>-1</sup>  |



|    |           |            |     |      |      |      |      |      |      |      |      |                       |
|----|-----------|------------|-----|------|------|------|------|------|------|------|------|-----------------------|
| 10 | 77244336  | rs3012060  | T/A | 1.05 | 1.20 | 1.05 | 1.05 | 1.05 | 1.01 | 0.24 | 0.99 | 8.1×10 <sup>-1</sup>  |
| 10 | 80943841  | rs703980   | G/A | 1.06 | 1.04 | 1.06 | 1.07 | 1.04 | 1.04 | 0.60 | 1.06 | 2.0×10 <sup>-1</sup>  |
| 10 | 89766368  | rs10887775 | A/G | 1.04 | 1.01 | 1.04 | 1.04 | 1.02 | 1.07 | 0.29 | 1.02 | 6.9×10 <sup>-1</sup>  |
| 10 | 94460650  | rs10882099 | T/C | 1.02 | 1.03 | 1.09 | 1.02 | 1.08 | 1.00 | 0.43 | 1.04 | 3.9×10 <sup>-1</sup>  |
| 10 | 94479107  | rs1112718  | A/G | 1.02 | 0.99 | 1.07 | 1.01 | 1.01 | 1.02 | 0.40 | 1.04 | 5.0×10 <sup>-1</sup>  |
| 10 | 99056190  | rs10748694 | A/T | 1.04 | 1.03 | 1.06 | 1.03 | 0.99 | 1.08 | 0.39 | 1.15 | 4.0×10 <sup>-3*</sup> |
| 10 | 112621837 | rs7067540  | C/T | 1.04 | 1.03 | 1.06 | 1.04 | 1.03 | 1.03 | 0.55 | 0.96 | 3.9×10 <sup>-1</sup>  |
| 10 | 114344288 | rs12243296 | G/A | 1.04 |      | 1.22 | 1.03 | 1.09 | 1.00 | 0.00 | 0.69 | 5.6×10 <sup>-1</sup>  |
| 10 | 114381965 | rs7100404  | C/T | 1.05 |      | 1.37 | 1.05 | 1.08 | 0.99 | 1.00 | 0.71 | 4.9×10 <sup>-1</sup>  |
| 10 | 114428364 | rs2859885  | C/T | 1.05 |      | 1.01 | 1.07 | 0.97 | 1.00 | 0.60 | 1.04 | 4.5×10 <sup>-1</sup>  |
| 10 | 114552267 | rs10787461 | G/A | 1.04 |      | 0.86 | 1.05 | 1.00 | 1.01 | 0.45 | 1.00 | 8.3×10 <sup>-1</sup>  |
| 10 | 114715598 | rs2104598  | G/A | 1.04 |      | 1.21 | 1.04 | 1.11 | 1.00 | 0.67 | 1.07 | 2.0×10 <sup>-1</sup>  |
| 10 | 114758349 | rs7903146  | T/C | 1.33 |      | 1.18 | 1.35 | 1.29 | 1.26 | 0.09 | 1.02 | 6.5×10 <sup>-1</sup>  |
| 10 | 114797893 | rs7076754  | G/A | 1.07 |      | 1.14 | 1.06 | 1.14 | 1.04 | 0.97 | 0.92 | 6.2×10 <sup>-1</sup>  |
| 10 | 114859416 | rs7081841  | G/C | 1.05 |      | 1.00 | 1.05 | 1.07 | 1.00 | 0.43 | 1.00 | 8.6×10 <sup>-1</sup>  |
| 10 | 115016408 | rs12257761 | T/C | 1.06 |      | 1.03 | 1.09 | 1.00 | 1.02 | 0.70 | 1.10 | 5.5×10 <sup>-2</sup>  |
| 10 | 115069951 | rs11196296 | T/C | 1.02 |      | 0.91 | 1.16 | 0.83 | 0.98 | 0.17 | 0.94 | 3.8×10 <sup>-1</sup>  |
| 10 | 115247447 | rs11596522 | T/G | 1.05 |      |      | 1.07 | 0.86 | 1.01 | 0.02 | 1.03 | 8.2×10 <sup>-1</sup>  |
| 10 | 122834572 | rs11199753 | G/T | 1.05 | 1.13 | 1.07 | 1.04 | 1.06 | 0.99 | 0.87 | 0.99 | 8.4×10 <sup>-1</sup>  |
| 10 | 122909625 | rs2172073  | A/C | 1.05 | 1.06 | 1.04 | 1.07 | 1.07 | 1.04 | 0.72 | 1.06 | 3.7×10 <sup>-1</sup>  |
| 10 | 122968964 | rs11592107 | A/G | 1.03 | 1.05 | 1.04 | 1.03 | 1.05 | 1.03 | 0.01 | 1.53 | 1.0×10 <sup>-1</sup>  |
| 10 | 124167512 | rs2421016  | C/T | 1.04 | 0.96 | 1.04 | 1.05 | 1.07 | 1.04 | 0.09 | 1.02 | 8.3×10 <sup>-1</sup>  |
| 11 | 2077271   | rs76547628 | T/C | 1.04 | 1.01 | 0.95 | 1.06 | 1.10 | 1.00 | 0.12 | 1.18 | 2.0×10 <sup>-2*</sup> |
| 11 | 2194420   | rs10770142 | G/C | 1.07 | 1.14 | 1.10 | 1.07 | 1.07 | 1.08 | 0.46 | 1.28 | 1.8×10 <sup>-7*</sup> |
| 11 | 2235129   | rs4930050  | G/A | 1.06 | 1.15 | 0.89 | 1.02 | 1.15 | 1.00 | 0.46 | 0.89 | 1.8×10 <sup>-2*</sup> |
| 11 | 2364549   | rs800125   | A/C | 1.01 | 0.91 | 0.99 | 1.03 | 0.94 | 1.00 | 0.52 | 1.04 | 4.6×10 <sup>-1</sup>  |
| 11 | 2375458   | rs79495865 | G/A | 1.02 | 1.13 | 0.94 | 1.04 | 1.07 | 1.02 | 0.66 | 0.96 | 3.5×10 <sup>-1</sup>  |
| 11 | 2579163   | rs2283164  | A/G | 1.09 | 1.16 | 1.08 | 1.11 | 1.01 | 1.10 | 0.99 | 0.86 | 6.8×10 <sup>-1</sup>  |
| 11 | 2681072   | rs151215   | G/A | 1.04 | 1.04 | 0.96 | 1.06 | 1.06 | 1.05 | 0.05 | 1.08 | 4.6×10 <sup>-1</sup>  |
| 11 | 2691500   | rs231361   | A/G | 1.09 | 1.12 | 1.04 | 1.10 | 1.12 | 1.08 | 0.66 | 0.91 | 9.7×10 <sup>-2</sup>  |
| 11 | 2799679   | rs2237884  | T/C | 1.04 | 1.03 | 1.07 | 1.04 | 1.10 | 0.96 | 0.55 | 1.05 | 3.7×10 <sup>-1</sup>  |

|    |           |             |     |      |      |      |      |      |      |      |      |                       |
|----|-----------|-------------|-----|------|------|------|------|------|------|------|------|-----------------------|
| 11 | 2857897   | rs234866    | G/A | 1.05 | 1.10 | 1.03 | 1.05 | 1.14 | 1.08 | 0.96 | 1.06 | 7.1×10 <sup>-1</sup>  |
| 11 | 2858546   | rs2237897   | C/T | 1.15 | 1.15 | 1.12 | 1.21 | 1.23 | 1.20 | 0.55 | 1.32 | 2.2×10 <sup>-8*</sup> |
| 11 | 2908754   | rs445084    | G/A | 1.04 | 1.07 | 1.03 | 1.04 | 1.12 | 1.04 | 0.41 | 1.05 | 2.8×10 <sup>-1</sup>  |
| 11 | 8654528   | rs10769936  | C/T | 1.03 | 1.02 | 1.03 | 1.04 | 1.06 | 1.00 | 0.79 | 1.00 | 8.4×10 <sup>-1</sup>  |
| 11 | 17408630  | rs5215      | C/T | 1.08 | 1.05 | 1.09 | 1.07 | 1.07 | 1.07 | 0.39 | 1.06 | 2.2×10 <sup>-1</sup>  |
| 11 | 27683618  | rs4923464   | C/T | 1.03 | 1.13 | 1.05 | 1.02 | 0.99 | 1.02 | 0.84 | 0.98 | 7.9×10 <sup>-1</sup>  |
| 11 | 32927778  | rs145678014 | G/T | 1.10 | 1.20 | 0.51 | 1.11 | 1.07 | 0.95 | 0.99 | 1.98 | 4.4×10 <sup>-2*</sup> |
| 11 | 43816200  | rs6485462   | C/T | 1.03 | 1.02 | 1.00 | 1.05 | 1.04 | 1.02 | 0.53 | 1.00 | 8.5×10 <sup>-1</sup>  |
| 11 | 49477266  | rs6485981   | T/C | 1.04 | 0.98 | 1.03 | 1.06 | 1.08 | 1.07 | 0.14 | 1.00 | 8.2×10 <sup>-1</sup>  |
| 11 | 65326154  | rs12789028  | A/G | 1.06 | 1.06 | 1.04 | 1.06 | 1.03 | 1.08 | 0.10 | 1.22 | 1.6×10 <sup>-2*</sup> |
| 11 | 72460398  | rs77464186  | A/C | 1.11 | 1.07 | 1.15 | 1.11 | 1.09 | 1.09 | 0.95 | 1.13 | 2.8×10 <sup>-1</sup>  |
| 11 | 76156973  | rs61894507  | G/A | 1.04 | 1.00 | 1.05 | 1.03 | 1.05 | 1.07 | 0.94 | 0.86 | 1.9×10 <sup>-1</sup>  |
| 11 | 92708710  | rs10830963  | G/C | 1.08 | 1.15 | 1.06 | 1.11 | 1.11 | 1.09 | 0.14 | 1.06 | 4.5×10 <sup>-1</sup>  |
| 11 | 93131667  | rs11020308  | A/C | 1.04 | 1.02 | 1.03 | 1.04 | 0.98 | 1.06 | 0.26 | 1.02 | 7.4×10 <sup>-1</sup>  |
| 11 | 128040810 | rs10893827  | A/G | 1.04 | 1.03 | 1.03 | 1.06 | 1.06 | 1.05 | 0.65 | 1.03 | 6.4×10 <sup>-1</sup>  |
| 11 | 128235252 | rs7104712   | C/A | 1.04 | 1.03 | 1.04 | 1.04 | 1.06 | 1.00 | 0.56 | 1.01 | 8.2×10 <sup>-1</sup>  |
| 11 | 128389391 | rs11819995  | T/C | 1.05 | 1.03 | 1.04 | 1.05 | 1.02 | 1.05 | 0.15 | 1.12 | 1.2×10 <sup>-1</sup>  |
| 12 | 4033222   | rs10848960  | G/C | 1.04 | 0.98 | 0.60 | 1.05 | 0.99 | 1.02 | 0.98 | 1.29 | 1.7×10 <sup>-1</sup>  |
| 12 | 4382324   | rs3812821   | G/C | 1.05 | 0.96 | 1.21 | 1.05 | 1.07 | 1.04 | 0.59 | 1.14 | 3.6×10 <sup>-3*</sup> |
| 12 | 26474867  | rs10842708  | G/A | 1.04 | 1.07 | 1.03 | 1.05 | 1.01 | 1.04 | 0.69 | 1.01 | 8.5×10 <sup>-1</sup>  |
| 12 | 27964996  | rs12578595  | C/T | 1.07 | 1.02 | 1.07 | 1.08 | 1.05 | 1.05 | 0.75 | 0.92 | 1.2×10 <sup>-1</sup>  |
| 12 | 33370406  | rs6488140   | A/G | 1.04 | 1.09 | 1.01 | 1.05 | 1.06 | 1.03 | 0.69 | 1.08 | 1.4×10 <sup>-1</sup>  |
| 12 | 50263148  | rs7132908   | A/G | 1.03 | 1.00 | 1.04 | 1.03 | 1.03 | 1.00 | 0.08 | 1.02 | 7.8×10 <sup>-1</sup>  |
| 12 | 66255005  | rs343093    | G/C | 1.07 | 1.12 | 1.07 | 1.08 | 1.09 | 1.05 | 0.23 | 1.10 | 9.3×10 <sup>-2</sup>  |
| 12 | 66360164  | rs7970350   | T/C | 1.04 | 1.00 | 1.04 | 1.05 | 1.01 | 1.03 | 0.82 | 0.99 | 7.7×10 <sup>-1</sup>  |
| 12 | 71449521  | rs7313668   | T/G | 1.04 | 0.97 | 1.05 | 1.05 | 1.03 | 1.02 | 0.04 | 1.20 | 1.5×10 <sup>-1</sup>  |
| 12 | 97851611  | rs7972074   | C/T | 1.04 | 1.06 | 1.04 | 1.02 | 1.10 | 1.01 | 0.82 | 1.06 | 2.9×10 <sup>-1</sup>  |
| 12 | 108629780 | rs1426371   | G/A | 1.05 | 1.04 | 1.05 | 1.05 | 1.04 | 1.04 | 0.82 | 1.01 | 8.4×10 <sup>-1</sup>  |
| 12 | 118412373 | rs34965774  | A/G | 1.06 | 1.05 | 1.07 | 1.06 | 1.06 | 1.05 | 0.32 | 1.03 | 6.5×10 <sup>-1</sup>  |
| 12 | 121456616 | rs61953351  | G/T | 1.06 | 0.98 | 1.06 | 1.07 | 1.12 | 0.99 | 0.98 | 0.91 | 5.8×10 <sup>-1</sup>  |
| 12 | 123618544 | rs1790116   | T/G | 1.04 | 1.03 | 1.03 | 1.04 | 1.03 | 1.07 | 0.55 | 1.00 | 7.1×10 <sup>-1</sup>  |

|    |           |            |     |      |      |      |      |      |      |      |      |                       |
|----|-----------|------------|-----|------|------|------|------|------|------|------|------|-----------------------|
| 12 | 124545435 | rs2451321  | C/G | 1.03 | 1.06 | 1.03 | 1.03 | 1.06 | 1.04 | 0.75 | 1.03 | 6.2×10 <sup>-1</sup>  |
| 12 | 133069698 | rs12811407 | A/G | 1.05 | 1.04 | 1.06 | 1.05 | 1.07 | 1.01 | 0.10 | 1.17 | 4.6×10 <sup>-2*</sup> |
| 13 | 23309382  | rs314879   | C/T | 1.04 | 1.08 | 1.04 | 1.04 | 1.05 | 1.04 | 0.02 | 1.27 | 2.0×10 <sup>-1</sup>  |
| 13 | 26776999  | rs34584161 | A/G | 1.05 | 1.00 | 1.06 | 1.05 | 1.02 | 1.04 | 0.34 | 1.06 | 2.8×10 <sup>-1</sup>  |
| 13 | 33554587  | rs2858980  | G/A | 1.06 | 1.02 | 1.07 | 1.06 | 1.06 | 1.07 | 0.31 | 1.12 | 2.4×10 <sup>-2*</sup> |
| 13 | 51096095  | rs963740   | A/T | 1.04 | 1.03 | 1.04 | 1.04 | 1.04 | 1.02 | 0.90 | 1.12 | 1.8×10 <sup>-1</sup>  |
| 13 | 54107583  | rs9568868  | T/G | 1.05 | 1.02 | 1.05 | 1.04 | 1.06 | 1.07 | 0.62 | 0.99 | 8.4×10 <sup>-1</sup>  |
| 13 | 80707429  | rs1215468  | A/G | 1.08 | 1.06 | 1.09 | 1.08 | 1.11 | 1.08 | 0.61 | 1.07 | 1.6×10 <sup>-1</sup>  |
| 13 | 91942919  | rs34165267 | C/T | 1.05 | 1.04 | 1.10 | 1.04 | 1.06 | 1.02 | 0.99 | 1.40 | 2.1×10 <sup>-1</sup>  |
| 14 | 33303540  | rs12883788 | T/C | 1.04 | 1.00 | 1.04 | 1.04 | 1.04 | 1.03 | 0.39 | 1.03 | 5.5×10 <sup>-1</sup>  |
| 14 | 38803756  | rs2183237  | G/A | 1.04 | 1.03 | 1.04 | 1.04 | 1.10 | 1.03 | 0.45 | 1.01 | 8.1×10 <sup>-1</sup>  |
| 14 | 79944099  | rs8008910  | A/G | 1.06 | 1.06 | 1.26 | 1.06 | 1.07 | 1.03 | 0.31 | 1.02 | 6.8×10 <sup>-1</sup>  |
| 14 | 101124721 | rs12878003 | G/A | 1.04 | 1.06 | 1.01 | 1.04 | 1.14 | 1.04 | 0.94 | 1.18 | 1.1×10 <sup>-1</sup>  |
| 14 | 101255172 | rs73347525 | A/G | 1.05 | 1.05 | 1.07 | 1.05 | 1.07 | 1.02 | 0.63 | 1.10 | 7.9×10 <sup>-2</sup>  |
| 14 | 101301866 | rs1053900  | C/T | 1.03 | 1.03 | 1.02 | 1.03 | 1.08 | 1.01 | 0.14 | 0.94 | 3.8×10 <sup>-1</sup>  |
| 14 | 103252270 | rs11160699 | A/G | 1.04 | 1.03 | 1.04 | 1.04 | 1.08 | 1.05 | 0.54 | 1.09 | 8.2×10 <sup>-2</sup>  |
| 15 | 38843887  | rs28582094 | G/A | 1.04 | 1.05 | 1.03 | 1.05 | 1.06 | 1.01 | 0.56 | 1.10 | 5.7×10 <sup>-2</sup>  |
| 15 | 40616742  | rs3743140  | A/G | 1.05 | 1.04 | 1.09 | 1.03 | 1.07 | 1.02 | 0.26 | 1.00 | 8.3×10 <sup>-1</sup>  |
| 15 | 41818917  | rs1473781  | A/G | 1.03 | 1.10 | 1.00 | 1.05 | 1.02 | 1.02 | 0.61 | 1.02 | 5.9×10 <sup>-1</sup>  |
| 15 | 52517714  | rs3825801  | C/T | 1.05 | 1.00 | 1.04 | 1.05 | 0.95 | 1.08 | 0.96 | 0.92 | 4.7×10 <sup>-1</sup>  |
| 15 | 62391608  | rs7163757  | C/T | 1.06 | 1.03 | 1.09 | 1.05 | 1.05 | 1.05 | 0.38 | 0.93 | 1.3×10 <sup>-1</sup>  |
| 15 | 63871292  | rs7178762  | C/T | 1.04 | 1.02 | 1.04 | 1.04 | 1.06 | 1.03 | 0.79 | 0.95 | 3.9×10 <sup>-1</sup>  |
| 15 | 68080886  | rs4776970  | A/T | 1.04 | 1.00 | 1.05 | 1.04 | 1.03 | 1.03 | 0.10 | 1.07 | 4.7×10 <sup>-1</sup>  |
| 15 | 75815758  | rs11636031 | T/C | 1.05 | 1.04 | 1.05 | 1.05 | 1.07 | 1.03 | 0.86 | 1.13 | 9.1×10 <sup>-2</sup>  |
| 15 | 77776562  | rs952472   | C/A | 1.08 | 1.06 | 1.08 | 1.08 | 1.08 | 1.06 | 0.65 | 1.07 | 2.4×10 <sup>-1</sup>  |
| 15 | 90379632  | rs6496609  | C/A | 1.07 | 1.13 | 1.06 | 1.07 | 1.01 | 1.06 | 0.08 | 1.19 | 6.6×10 <sup>-2</sup>  |
| 15 | 91513157  | rs2890156  | A/T | 1.07 | 1.06 | 1.08 | 1.07 | 1.05 | 1.08 | 0.39 | 1.01 | 7.7×10 <sup>-1</sup>  |
| 15 | 93832067  | rs7167984  | G/A | 1.04 | 1.04 | 1.06 | 1.03 | 1.05 | 1.01 | 0.53 | 1.05 | 2.9×10 <sup>-1</sup>  |
| 16 | 295795    | rs6600191  | T/C | 1.04 | 1.04 | 1.03 | 1.06 | 1.02 | 1.04 | 0.47 | 1.04 | 4.8×10 <sup>-1</sup>  |
| 16 | 3613126   | rs12445430 | T/C | 1.04 | 1.06 | 1.04 | 1.04 | 1.06 | 1.03 | 0.18 | 1.10 | 1.6×10 <sup>-1</sup>  |
| 16 | 53809123  | rs55872725 | T/C | 1.13 | 1.11 | 1.15 | 1.13 | 1.15 | 1.07 | 0.15 | 1.15 | 4.8×10 <sup>-2*</sup> |

|    |          |             |     |      |      |      |      |      |      |      |      |                       |
|----|----------|-------------|-----|------|------|------|------|------|------|------|------|-----------------------|
| 16 | 69651866 | rs862320    | C/T | 1.04 | 1.02 | 1.03 | 1.04 | 1.02 | 1.01 | 0.88 | 0.88 | 7.3×10 <sup>-2</sup>  |
| 16 | 73100308 | rs6416749   | C/T | 1.04 | 1.01 | 1.06 | 1.03 | 1.05 | 1.01 | 0.21 | 1.01 | 8.4×10 <sup>-1</sup>  |
| 16 | 75243657 | rs72802358  | G/C | 1.09 | 0.99 | 1.10 | 1.12 | 1.07 | 1.10 | 0.95 | 1.21 | 8.3×10 <sup>-2</sup>  |
| 16 | 81534790 | rs2925979   | T/C | 1.05 | 1.03 | 1.04 | 1.06 | 1.02 | 1.08 | 0.07 | 0.97 | 6.8×10 <sup>-1</sup>  |
| 16 | 88554480 | rs9937296   | C/T | 1.04 | 0.99 | 1.04 | 1.05 | 1.07 | 1.02 | 0.53 | 1.02 | 8.0×10 <sup>-1</sup>  |
| 17 | 3828086  | rs1043246   | G/C | 1.05 | 1.00 | 1.04 | 1.05 | 1.04 | 1.08 | 0.57 | 1.00 | 7.9×10 <sup>-1</sup>  |
| 17 | 3988451  | rs8071043   | C/T | 1.04 | 1.07 | 0.99 | 1.05 | 1.03 | 1.02 | 0.66 | 0.97 | 5.7×10 <sup>-1</sup>  |
| 17 | 6953155  | rs113748381 | A/G | 1.11 | 1.08 | 1.13 | 1.08 | 1.13 | 0.81 | 0.40 | 1.02 | 7.0×10 <sup>-1</sup>  |
| 17 | 17751478 | rs1108646   | A/G | 1.04 | 0.99 | 1.04 | 1.04 | 1.05 | 1.04 | 0.64 | 1.01 | 8.4×10 <sup>-1</sup>  |
| 17 | 29704002 | rs1048317   | T/C | 1.04 | 1.04 | 1.05 | 1.03 | 1.06 | 1.02 | 0.83 | 1.15 | 2.3×10 <sup>-2*</sup> |
| 17 | 36043653 | rs3094515   | C/T | 1.04 | 1.06 | 1.03 | 1.05 | 1.04 | 1.02 | 0.75 | 1.11 | 5.1×10 <sup>-2</sup>  |
| 17 | 36056076 | rs12449654  | C/G | 1.05 | 1.04 | 1.08 | 1.04 | 1.12 | 1.01 | 0.45 | 1.05 | 4.0×10 <sup>-1</sup>  |
| 17 | 36099952 | rs10908278  | T/A | 1.09 | 1.00 | 1.14 | 1.08 | 1.04 | 1.08 | 0.33 | 1.09 | 9.6×10 <sup>-2</sup>  |
| 17 | 40696915 | rs684214    | T/C | 1.04 | 1.08 | 1.03 | 1.05 | 1.04 | 1.02 | 0.05 | 1.07 | 5.3×10 <sup>-1</sup>  |
| 17 | 47060322 | rs35895680  | C/A | 1.05 | 1.04 | 1.04 | 1.06 | 1.01 | 1.02 | 0.74 | 1.02 | 7.3×10 <sup>-1</sup>  |
| 17 | 62203128 | rs57676627  | T/C | 1.06 | 1.02 | 1.41 | 1.06 | 1.07 | 1.09 | 0.02 | 0.99 | 8.6×10 <sup>-1</sup>  |
| 17 | 65957568 | rs9899520   | A/G | 1.04 | 0.97 | 1.04 | 1.05 | 1.01 | 1.04 | 0.38 | 1.06 | 2.7×10 <sup>-1</sup>  |
| 17 | 76792179 | rs1044486   | G/A | 1.04 | 1.07 | 1.04 | 1.03 | 1.06 | 1.04 | 0.56 | 1.08 | 1.4×10 <sup>-1</sup>  |
| 18 | 7076836  | rs9948462   | T/C | 1.04 | 0.99 | 1.05 | 1.04 | 1.03 | 1.05 | 0.72 | 0.98 | 7.2×10 <sup>-1</sup>  |
| 18 | 56876430 | rs9957320   | G/T | 1.05 | 1.00 | 1.02 | 1.06 | 1.09 | 1.04 | 0.58 | 1.05 | 3.8×10 <sup>-1</sup>  |
| 18 | 57829135 | rs6567160   | C/T | 1.07 | 1.08 | 1.09 | 1.06 | 1.13 | 1.06 | 0.03 | 0.84 | 3.3×10 <sup>-1</sup>  |
| 18 | 60845884 | rs12454712  | T/C | 1.05 | 1.02 | 1.05 | 1.05 | 1.06 | 1.03 | 0.64 | 1.05 | 3.0×10 <sup>-1</sup>  |
| 19 | 4951064  | rs262549    | G/C | 1.05 | 1.03 | 1.05 | 1.05 | 1.05 | 1.04 | 0.09 | 1.10 | 2.9×10 <sup>-1</sup>  |
| 19 | 7968168  | rs2115107   | A/G | 1.05 | 1.07 | 1.05 | 1.05 | 1.04 | 1.02 | 0.33 | 1.01 | 8.2×10 <sup>-1</sup>  |
| 19 | 12509536 | rs4804181   | A/C | 1.04 | 1.01 | 1.04 | 1.04 | 1.04 | 1.03 | 0.66 | 1.02 | 6.9×10 <sup>-1</sup>  |
| 19 | 19379549 | rs58542926  | T/C | 1.07 | 1.05 | 1.03 | 1.09 | 1.12 | 1.04 | 0.02 | 1.07 | 7.2×10 <sup>-1</sup>  |
| 19 | 33890838 | rs10406327  | C/G | 1.04 | 1.02 | 1.07 | 1.04 | 1.00 | 1.03 | 0.76 | 1.02 | 6.8×10 <sup>-1</sup>  |
| 19 | 45326768 | rs1871045   | T/C | 1.03 | 1.04 | 1.04 | 1.03 | 1.04 | 1.05 | 0.38 | 1.08 | 1.1×10 <sup>-1</sup>  |
| 19 | 45411941 | rs429358    | T/C | 1.06 | 1.04 | 1.03 | 1.07 | 1.05 | 1.04 | 0.85 | 0.88 | 7.1×10 <sup>-2</sup>  |
| 19 | 46157019 | rs10406431  | A/G | 1.05 | 1.02 | 1.07 | 1.05 | 1.02 | 1.05 | 0.46 | 1.00 | 9.2×10 <sup>-1</sup>  |
| 19 | 46178661 | rs2238689   | C/T | 1.04 | 1.00 | 1.04 | 1.04 | 1.03 | 1.03 | 0.42 | 1.06 | 2.3×10 <sup>-1</sup>  |

|    |          |            |     |      |      |      |      |      |      |      |      |                       |
|----|----------|------------|-----|------|------|------|------|------|------|------|------|-----------------------|
| 19 | 47569003 | rs3810291  | A/G | 1.05 | 1.05 | 1.04 | 1.04 | 1.09 | 1.04 | 0.63 | 1.05 | 4.4×10 <sup>-1</sup>  |
| 20 | 22427370 | rs2181063  | C/G | 1.03 | 1.03 | 1.05 | 1.03 | 0.98 | 1.02 | 0.83 | 1.05 | 4.5×10 <sup>-1</sup>  |
| 20 | 32674967 | rs4911405  | T/C | 1.04 | 1.08 | 1.01 | 1.04 | 1.07 | 1.03 | 0.65 | 1.04 | 4.2×10 <sup>-1</sup>  |
| 20 | 42994812 | rs12625671 | C/T | 1.08 | 1.14 | 1.08 | 1.08 | 1.08 | 1.11 | 0.81 | 1.05 | 5.1×10 <sup>-1</sup>  |
| 20 | 43042364 | rs1800961  | T/C | 1.16 | 1.10 | 1.15 | 1.18 | 1.14 | 1.07 | 0.03 | 1.39 | 1.4×10 <sup>-2*</sup> |
| 20 | 45596378 | rs6063046  | A/G | 1.04 | 1.07 | 1.03 | 1.05 | 1.04 | 1.03 | 0.84 | 1.16 | 2.9×10 <sup>-2*</sup> |
| 20 | 48832020 | rs6091115  | T/C | 1.05 | 1.04 | 1.05 | 1.04 | 1.06 | 1.05 | 0.52 | 1.06 | 2.3×10 <sup>-1</sup>  |
| 20 | 57387352 | rs736266   | T/A | 1.03 | 1.03 | 1.03 | 1.04 | 1.02 | 0.99 | 0.70 | 1.07 | 2.4×10 <sup>-1</sup>  |
| 22 | 30205572 | rs36575    | C/T | 1.08 | 1.08 | 0.80 | 1.08 | 1.08 | 1.07 | 0.99 | 0.96 | 8.1×10 <sup>-1</sup>  |
| 22 | 32203334 | rs75307421 | A/G | 1.10 | 1.06 | 1.06 | 1.11 | 1.16 | 1.08 | 0.21 | 1.15 | 2.3×10 <sup>-2*</sup> |
| 22 | 44324730 | rs738408   | T/C | 1.03 | 1.03 | 1.02 | 1.04 | 1.06 | 1.02 | 0.81 | 0.96 | 4.5×10 <sup>-1</sup>  |
| 22 | 50356302 | rs28691713 | C/T | 1.05 | 1.06 | 1.08 | 1.04 | 1.00 | 1.03 | 0.60 | 1.03 | 5.6×10 <sup>-1</sup>  |

<sup>a</sup> Chr is chromosome.

<sup>b</sup> Position is in base pairs (bp) on Genome Reference Consortium Human Build 37.

<sup>c</sup> A1/a2 are the alleles from DIAMANTE 2022, with the effect allele given first.

<sup>d</sup> OR is reported per copy of the effect allele, with all but OR<sub>pop</sub> calculated for participants within each ancestry group included in the DIAMANTE 2022 GWAS meta-analysis: OR<sub>comp</sub> for the multi-ancestry composite PS, OR<sub>af</sub> for the multi-ancestry African PS, OR<sub>ea</sub> for the multi-ancestry East Asian PS, OR<sub>eu</sub> for the multi-ancestry European PS, OR<sub>his</sub> for the multi-ancestry Latino/Hispanic PS, OR<sub>sa</sub> for the multi-ancestry South Asian PS. OR is not reported for all SNPs across analyses for various ancestry groups: see DIAMANTE 2022<sup>9</sup> methodologies for details.

<sup>e</sup> Freq<sub>pop</sub> is the frequency of a1 in the present Indigenous study population.

<sup>f</sup> OR<sub>pop</sub> is the OR calculated and cross-validated for the population-specific weight score using the same set of variants as the multi-ancestry composite PS.

\*Indicates nominally significant ( $p < 0.05$ ), and directionally consistent with multi-ancestry result, association in the current study population.

**Table S6. SNPs included in the population-specific variant PS.**

| chr <sup>a</sup> | position <sup>b</sup> | SNP            | subsets <sup>c</sup> | a1/a2 <sup>d</sup> | a1f <sup>e</sup> | OR <sup>f</sup> | p-value              |
|------------------|-----------------------|----------------|----------------------|--------------------|------------------|-----------------|----------------------|
| 1                | 3637812               | rs2181487      | 1>2                  | C/A                | 0.41             | 1.28            | 9.9×10 <sup>-5</sup> |
| 1                | 3675959               | rs12131045     | 1>2                  | G/T                | 0.32             | 1.37            | 5.0×10 <sup>-6</sup> |
| 1                | 7532704               | rs1474950912   | 1>2                  | C/G                | 0.94             | 1.62            | 2.5×10 <sup>-4</sup> |
| 1                | 10201624              | rs77567553     | 1>2                  | A/G                | 0.85             | 1.36            | 5.5×10 <sup>-4</sup> |
| 1                | 16322282              | rs1024537880   | 2>1                  | G/A                | 0.08             | 1.65            | 2.0×10 <sup>-5</sup> |
| 1                | 18793386              | rs12041192     | 2>1                  | A/G                | 0.07             | 1.55            | 4.4×10 <sup>-4</sup> |
| 1                | 20610244              | rs55928751     | 2>1                  | A/G                | 0.26             | 1.28            | 6.0×10 <sup>-4</sup> |
| 1                | 38590813              | rs898985       | 1>2                  | C/T                | 0.76             | 1.29            | 5.5×10 <sup>-4</sup> |
| 1                | 39130160              | rs4474214      | 1>2                  | G/T                | 0.84             | 1.36            | 4.1×10 <sup>-4</sup> |
| 1                | 58273678              | rs72664686     | 2>1                  | T/G                | 0.49             | 1.25            | 4.2×10 <sup>-4</sup> |
| 1                | 63673963              | rs147237461    | 2>1                  | A/G                | 0.25             | 1.33            | 8.0×10 <sup>-5</sup> |
| 1                | 63722576              | rs141607445    | 2>1                  | G/A                | 0.25             | 1.35            | 4.0×10 <sup>-5</sup> |
| 1                | 66602990              | rs551000       | 1>2                  | C/T                | 0.12             | 1.43            | 2.8×10 <sup>-4</sup> |
| 1                | 67826180              | rs114967702    | 2>1                  | A/G                | 0.76             | 1.35            | 3.4×10 <sup>-5</sup> |
| 1                | 67983243              | rs10789236     | 1>2                  | C/T                | 0.47             | 1.28            | 1.7×10 <sup>-4</sup> |
| 1                | 68225671              | rs554355       | 1>2                  | A/G                | 0.20             | 1.32            | 4.6×10 <sup>-4</sup> |
| 1                | 69459021              | rs199961703    | 1>2                  | I/D                | 0.86             | 1.38            | 5.6×10 <sup>-4</sup> |
| 1                | 71093805              | rs8179355      | 1>2                  | C/A                | 0.63             | 1.33            | 2.2×10 <sup>-5</sup> |
| 1                | 71172305              | rs76562719     | 1>2                  | G/A                | 0.66             | 1.31            | 5.7×10 <sup>-5</sup> |
| 1                | 89948844              | rs9427984      | 1>2                  | A/G                | 0.59             | 1.26            | 4.7×10 <sup>-4</sup> |
| 1                | 91402075              | rs358694       | 1>2                  | C/T                | 0.36             | 1.28            | 2.2×10 <sup>-4</sup> |
| 1                | 91526198              | rs2625760      | 1>2                  | A/G                | 0.40             | 1.32            | 2.3×10 <sup>-5</sup> |
| 1                | 98141714              | rs189939377    | 2>1                  | C/T                | 0.07             | 1.52            | 4.5×10 <sup>-4</sup> |
| 1                | 111727851             | chr1:111727851 | 2>1                  | A/C                | 0.96             | 1.86            | 6.1×10 <sup>-5</sup> |
| 1                | 115721655             | rs10858066     | 2>1                  | C/T                | 0.55             | 1.29            | 9.8×10 <sup>-5</sup> |
| 1                | 116403499             | rs975972       | 1>2                  | C/T                | 0.20             | 1.34            | 2.3×10 <sup>-4</sup> |
| 1                | 164492700             | rs6677872      | 1>2                  | T/G                | 0.93             | 1.60            | 1.8×10 <sup>-4</sup> |
| 1                | 169455435             | rs2056926      | 2>1                  | C/G                | 0.20             | 1.39            | 1.3×10 <sup>-5</sup> |

|   |           |                |     |     |      |      |                      |
|---|-----------|----------------|-----|-----|------|------|----------------------|
| 1 | 169529973 | rs6029         | 2>1 | T/C | 0.19 | 1.39 | 3.0×10 <sup>-5</sup> |
| 1 | 183709624 | rs12407737     | 1>2 | C/A | 0.95 | 1.67 | 3.5×10 <sup>-4</sup> |
| 1 | 183747518 | rs78151551     | 1>2 | A/G | 0.95 | 1.67 | 3.3×10 <sup>-4</sup> |
| 1 | 187743426 | rs115672901    | 1>2 | T/G | 0.90 | 1.45 | 4.3×10 <sup>-4</sup> |
| 1 | 193504097 | rs12034778     | 2>1 | T/A | 0.84 | 1.36 | 3.1×10 <sup>-4</sup> |
| 1 | 194775338 | rs6656153      | 2>1 | T/C | 0.08 | 1.47 | 5.2×10 <sup>-4</sup> |
| 1 | 202114469 | rs11581162     | 1>2 | G/A | 0.10 | 1.48 | 3.3×10 <sup>-4</sup> |
| 1 | 221303867 | rs10863588     | 1>2 | C/T | 0.12 | 1.44 | 2.7×10 <sup>-4</sup> |
| 1 | 230011750 | rs149517808    | 1>2 | T/C | 0.14 | 1.38 | 5.3×10 <sup>-4</sup> |
| 1 | 230486870 | rs74634891     | 1>2 | G/A | 0.88 | 1.55 | 6.6×10 <sup>-6</sup> |
| 1 | 230619350 | rs12048353     | 1>2 | C/T | 0.34 | 1.31 | 9.2×10 <sup>-5</sup> |
| 1 | 237215582 | chr1:237215582 | 1>2 | G/T | 0.04 | 1.78 | 4.7×10 <sup>-4</sup> |
| 1 | 237326254 | rs111689687    | 1>2 | G/T | 0.05 | 1.78 | 9.3×10 <sup>-5</sup> |
| 1 | 247363038 | rs12130823     | 1>2 | G/T | 0.25 | 1.29 | 4.1×10 <sup>-4</sup> |
| 2 | 3457459   | rs12619324     | 1>2 | G/A | 0.83 | 1.34 | 5.4×10 <sup>-4</sup> |
| 2 | 5689487   | rs2882275      | 1>2 | T/C | 0.28 | 1.28 | 4.1×10 <sup>-4</sup> |
| 2 | 16277283  | rs138932039    | 2>1 | C/T | 0.26 | 1.33 | 7.8×10 <sup>-5</sup> |
| 2 | 16336621  | rs144177256    | 2>1 | C/G | 0.21 | 1.37 | 6.3×10 <sup>-5</sup> |
| 2 | 28819516  | rs10194430     | 1>2 | A/G | 0.34 | 1.26 | 6.4×10 <sup>-4</sup> |
| 2 | 33243179  | rs75886200     | 1>2 | G/C | 0.07 | 1.64 | 8.6×10 <sup>-5</sup> |
| 2 | 33267614  | rs13393464     | 2>1 | T/C | 0.88 | 1.42 | 1.3×10 <sup>-4</sup> |
| 2 | 33626885  | rs78541119     | 1>2 | G/A | 0.04 | 1.90 | 2.2×10 <sup>-4</sup> |
| 2 | 33626957  | rs609277       | 2>1 | T/G | 0.38 | 1.25 | 6.2×10 <sup>-4</sup> |
| 2 | 42114002  | rs13028888     | 2>1 | C/T | 0.39 | 1.25 | 4.6×10 <sup>-4</sup> |
| 2 | 45572181  | rs13036196     | 1>2 | T/C | 0.76 | 1.31 | 2.5×10 <sup>-4</sup> |
| 2 | 45668873  | rs3770252      | 1>2 | G/T | 0.81 | 1.32 | 5.7×10 <sup>-4</sup> |
| 2 | 49641556  | rs17835319     | 2>1 | A/G | 0.20 | 1.34 | 2.4×10 <sup>-4</sup> |
| 2 | 55090468  | rs35459932     | 2>1 | A/G | 0.84 | 1.37 | 2.2×10 <sup>-4</sup> |
| 2 | 98481711  | rs139613671    | 1>2 | C/T | 0.23 | 1.33 | 1.8×10 <sup>-4</sup> |
| 2 | 98647080  | rs143198148    | 1>2 | C/G | 0.19 | 1.33 | 5.2×10 <sup>-4</sup> |
| 2 | 100862903 | rs6737502      | 1>2 | C/T | 0.78 | 1.35 | 1.9×10 <sup>-4</sup> |

|   |           |                |     |     |      |      |                      |
|---|-----------|----------------|-----|-----|------|------|----------------------|
| 2 | 106401187 | chr2:106401187 | 2>1 | D/I | 0.01 | 2.79 | 5.1×10 <sup>-4</sup> |
| 2 | 110282530 | chr2:110282530 | 2>1 | T/G | 0.95 | 1.71 | 5.7×10 <sup>-4</sup> |
| 2 | 111413674 | chr2:111413674 | 2>1 | G/A | 0.96 | 1.82 | 2.9×10 <sup>-4</sup> |
| 2 | 111881704 | chr2:111881704 | 2>1 | C/T | 0.96 | 1.83 | 2.2×10 <sup>-4</sup> |
| 2 | 121084993 | rs73951213     | 2>1 | A/G | 0.92 | 1.50 | 2.8×10 <sup>-4</sup> |
| 2 | 129213748 | rs10175448     | 2>1 | T/C | 0.41 | 1.24 | 5.7×10 <sup>-4</sup> |
| 2 | 130178361 | rs66638135     | 2>1 | I/D | 0.67 | 1.26 | 4.8×10 <sup>-4</sup> |
| 2 | 170981031 | rs4668198      | 1>2 | C/T | 0.62 | 1.26 | 4.5×10 <sup>-4</sup> |
| 2 | 174267408 | rs10194659     | 1>2 | C/G | 0.31 | 1.34 | 3.1×10 <sup>-5</sup> |
| 2 | 180454209 | rs79903308     | 1>2 | A/G | 0.07 | 1.63 | 1.2×10 <sup>-4</sup> |
| 2 | 180543780 | rs1515286      | 1>2 | A/C | 0.18 | 1.42 | 2.2×10 <sup>-5</sup> |
| 2 | 198169130 | rs12464356     | 1>2 | T/C | 0.88 | 1.46 | 1.3×10 <sup>-4</sup> |
| 2 | 198298448 | rs150021501    | 1>2 | I/D | 0.88 | 1.41 | 4.5×10 <sup>-4</sup> |
| 2 | 198515254 | rs116121900    | 1>2 | G/A | 0.86 | 1.40 | 2.7×10 <sup>-4</sup> |
| 2 | 199679110 | rs10189905     | 1>2 | G/T | 0.24 | 1.31 | 4.3×10 <sup>-4</sup> |
| 2 | 207412722 | rs3217266      | 2>1 | I/D | 0.80 | 1.37 | 4.2×10 <sup>-5</sup> |
| 2 | 207518184 | rs10186535     | 2>1 | T/C | 0.78 | 1.29 | 5.9×10 <sup>-4</sup> |
| 2 | 208333760 | chr2:208333760 | 2>1 | C/T | 0.95 | 1.67 | 4.3×10 <sup>-4</sup> |
| 2 | 215243598 | rs6705674      | 1>2 | C/T | 0.41 | 1.26 | 3.6×10 <sup>-4</sup> |
| 2 | 215401934 | rs77091556     | 1>2 | T/G | 0.27 | 1.33 | 8.1×10 <sup>-5</sup> |
| 2 | 216023682 | rs7419736      | 1>2 | G/A | 0.75 | 1.35 | 6.1×10 <sup>-5</sup> |
| 2 | 216138939 | rs112349663    | 1>2 | I/D | 0.80 | 1.39 | 4.6×10 <sup>-5</sup> |
| 2 | 220821732 | rs80349138     | 1>2 | A/C | 0.84 | 1.39 | 1.4×10 <sup>-4</sup> |
| 2 | 221639854 | rs6755421      | 2>1 | A/G | 0.64 | 1.26 | 4.3×10 <sup>-4</sup> |
| 2 | 222027666 | rs2019083      | 1>2 | C/T | 0.59 | 1.25 | 5.8×10 <sup>-4</sup> |
| 2 | 225105625 | chr2:225105625 | 1>2 | G/C | 0.96 | 1.79 | 3.2×10 <sup>-4</sup> |
| 2 | 226360771 | rs1963400      | 2>1 | T/G | 0.80 | 1.30 | 5.7×10 <sup>-4</sup> |
| 2 | 226857138 | rs138124232    | 1>2 | C/A | 0.87 | 1.39 | 5.9×10 <sup>-4</sup> |
| 2 | 226979415 | rs139975434    | 1>2 | A/G | 0.83 | 1.35 | 6.2×10 <sup>-4</sup> |
| 2 | 227131174 | rs41504645     | 1>2 | T/C | 0.86 | 1.39 | 3.8×10 <sup>-4</sup> |
| 2 | 230284815 | rs2396663      | 2>1 | T/C | 0.72 | 1.28 | 4.5×10 <sup>-4</sup> |



|   |           |               |     |     |      |      |                      |
|---|-----------|---------------|-----|-----|------|------|----------------------|
| 2 | 232190769 | rs56678553    | 1>2 | A/G | 0.65 | 1.32 | 3.8×10 <sup>-5</sup> |
| 2 | 239775835 | rs150530918   | 1>2 | G/A | 0.12 | 1.43 | 3.1×10 <sup>-4</sup> |
| 2 | 242490658 | rs13408032    | 1>2 | T/C | 0.47 | 1.25 | 4.6×10 <sup>-4</sup> |
| 2 | 242577950 | rs17140248    | 1>2 | A/G | 0.39 | 1.25 | 4.8×10 <sup>-4</sup> |
| 3 | 1293504   | rs3772339     | 1>2 | A/C | 0.29 | 1.29 | 3.3×10 <sup>-4</sup> |
| 3 | 7589639   | rs117534611   | 2>1 | A/G | 0.14 | 1.42 | 1.0×10 <sup>-4</sup> |
| 3 | 9977244   | rs3894571     | 2>1 | T/C | 0.30 | 1.30 | 9.0×10 <sup>-5</sup> |
| 3 | 15382870  | rs2103079     | 1>2 | T/C | 0.77 | 1.32 | 1.7×10 <sup>-4</sup> |
| 3 | 39844963  | rs62261638    | 1>2 | G/A | 0.33 | 1.31 | 1.0×10 <sup>-4</sup> |
| 3 | 39966748  | rs11717034    | 1>2 | G/A | 0.30 | 1.30 | 1.8×10 <sup>-4</sup> |
| 3 | 57038055  | rs183677269   | 2>1 | C/A | 0.86 | 1.36 | 4.8×10 <sup>-4</sup> |
| 3 | 57151483  | rs189430546   | 2>1 | T/C | 0.86 | 1.37 | 5.0×10 <sup>-4</sup> |
| 3 | 58822664  | rs79407372    | 1>2 | G/A | 0.87 | 1.40 | 4.6×10 <sup>-4</sup> |
| 3 | 59777427  | rs67777617    | 1>2 | G/T | 0.56 | 1.25 | 4.0×10 <sup>-4</sup> |
| 3 | 60742058  | rs13063937    | 1>2 | C/A | 0.73 | 1.31 | 1.8×10 <sup>-4</sup> |
| 3 | 60833504  | rs76349782    | 1>2 | T/A | 0.86 | 1.43 | 9.2×10 <sup>-5</sup> |
| 3 | 62531625  | rs17695565    | 1>2 | T/C | 0.82 | 1.38 | 1.3×10 <sup>-4</sup> |
| 3 | 64835496  | rs73119726    | 2>1 | C/T | 0.87 | 1.45 | 7.1×10 <sup>-5</sup> |
| 3 | 65023127  | rs4688534     | 2>1 | C/A | 0.24 | 1.29 | 4.8×10 <sup>-4</sup> |
| 3 | 73701944  | rs6781766     | 1>2 | T/C | 0.33 | 1.27 | 3.8×10 <sup>-4</sup> |
| 3 | 73860347  | rs61663855    | 1>2 | D/I | 0.13 | 1.39 | 5.4×10 <sup>-4</sup> |
| 3 | 89994954  | chr3:89994954 | 2>1 | C/T | 0.07 | 1.53 | 4.6×10 <sup>-4</sup> |
| 3 | 96503627  | rs75849815    | 1>2 | T/A | 0.10 | 1.45 | 5.8×10 <sup>-4</sup> |
| 3 | 98562718  | rs79834212    | 1>2 | G/C | 0.41 | 1.28 | 1.8×10 <sup>-4</sup> |
| 3 | 98736435  | rs80040807    | 1>2 | A/C | 0.38 | 1.27 | 3.3×10 <sup>-4</sup> |
| 3 | 105005089 | rs16851027    | 1>2 | C/T | 0.30 | 1.29 | 3.6×10 <sup>-4</sup> |
| 3 | 105047616 | rs10575418    | 1>2 | I/D | 0.63 | 1.26 | 5.0×10 <sup>-4</sup> |
| 3 | 108652222 | rs5851624     | 1>2 | D/I | 0.31 | 1.27 | 5.5×10 <sup>-4</sup> |
| 3 | 112556904 | rs6795521     | 2>1 | G/C | 0.31 | 1.30 | 9.0×10 <sup>-5</sup> |
| 3 | 112914615 | rs972554      | 2>1 | A/G | 0.32 | 1.25 | 6.1×10 <sup>-4</sup> |
| 3 | 116317395 | rs1518327     | 1>2 | T/G | 0.33 | 1.29 | 1.7×10 <sup>-4</sup> |

|   |           |              |     |     |      |      |                      |
|---|-----------|--------------|-----|-----|------|------|----------------------|
| 3 | 131374802 | rs9861011    | 1>2 | G/A | 0.73 | 1.29 | 4.6×10 <sup>-4</sup> |
| 3 | 131835569 | rs13074860   | 2>1 | C/T | 0.15 | 1.37 | 3.6×10 <sup>-4</sup> |
| 3 | 133258597 | rs4533654    | 1>2 | T/G | 0.73 | 1.32 | 8.2×10 <sup>-5</sup> |
| 3 | 140296782 | rs75476344   | 2>1 | A/G | 0.20 | 1.30 | 5.9×10 <sup>-4</sup> |
| 3 | 141031298 | rs79507063   | 2>1 | T/G | 0.82 | 1.34 | 3.7×10 <sup>-4</sup> |
| 3 | 143806538 | rs16854922   | 1>2 | G/C | 0.88 | 1.41 | 5.2×10 <sup>-4</sup> |
| 3 | 148122713 | rs4321499    | 2>1 | G/T | 0.21 | 1.32 | 3.9×10 <sup>-4</sup> |
| 3 | 149050925 | rs1526786    | 2>1 | T/C | 0.24 | 1.29 | 3.1×10 <sup>-4</sup> |
| 3 | 167082105 | rs79573605   | 2>1 | G/C | 0.10 | 1.44 | 4.4×10 <sup>-4</sup> |
| 3 | 172707771 | rs76050108   | 1>2 | A/T | 0.92 | 1.58 | 1.2×10 <sup>-4</sup> |
| 3 | 174762060 | rs9863629    | 2>1 | T/C | 0.86 | 1.40 | 1.6×10 <sup>-4</sup> |
| 3 | 176927519 | rs62296619   | 2>1 | C/T | 0.78 | 1.30 | 3.4×10 <sup>-4</sup> |
| 3 | 181080833 | rs118012541  | 2>1 | G/A | 0.84 | 1.37 | 2.5×10 <sup>-4</sup> |
| 3 | 181505245 | rs74909304   | 1>2 | C/A | 0.46 | 1.31 | 3.9×10 <sup>-5</sup> |
| 3 | 184118600 | rs7648852    | 1>2 | G/A | 0.40 | 1.30 | 6.9×10 <sup>-5</sup> |
| 3 | 185680144 | rs10937233   | 1>2 | T/C | 0.30 | 1.27 | 6.0×10 <sup>-4</sup> |
| 3 | 185877745 | rs138925570  | 1>2 | G/A | 0.93 | 1.61 | 1.0×10 <sup>-4</sup> |
| 3 | 186346272 | rs73061438   | 1>2 | G/A | 0.42 | 1.28 | 1.8×10 <sup>-4</sup> |
| 3 | 188149586 | rs7649407    | 2>1 | A/G | 0.87 | 1.38 | 4.8×10 <sup>-4</sup> |
| 3 | 189048167 | rs4687038    | 2>1 | C/T | 0.34 | 1.32 | 2.9×10 <sup>-5</sup> |
| 3 | 194400812 | rs9820108    | 1>2 | A/G | 0.33 | 1.27 | 5.7×10 <sup>-4</sup> |
| 4 | 3682614   | chr4:3682614 | 2>1 | T/C | 0.90 | 1.42 | 6.4×10 <sup>-4</sup> |
| 4 | 8755903   | rs140893109  | 2>1 | G/A | 0.94 | 1.62 | 2.4×10 <sup>-4</sup> |
| 4 | 9902230   | rs4235344    | 2>1 | A/G | 0.13 | 1.38 | 4.8×10 <sup>-4</sup> |
| 4 | 10535135  | rs117906214  | 2>1 | G/A | 0.20 | 1.30 | 5.4×10 <sup>-4</sup> |
| 4 | 11572999  | rs2191065    | 2>1 | G/A | 0.89 | 1.42 | 4.1×10 <sup>-4</sup> |
| 4 | 14865904  | rs2047203    | 2>1 | A/T | 0.19 | 1.32 | 6.6×10 <sup>-4</sup> |
| 4 | 24280616  | rs59580288   | 2>1 | D/I | 0.22 | 1.32 | 2.0×10 <sup>-4</sup> |
| 4 | 33764638  | rs144917101  | 1>2 | G/A | 0.88 | 1.44 | 2.1×10 <sup>-4</sup> |
| 4 | 34075738  | rs116018934  | 1>2 | A/C | 0.89 | 1.42 | 3.8×10 <sup>-4</sup> |
| 4 | 42123860  | rs137880547  | 1>2 | T/C | 0.91 | 1.50 | 5.0×10 <sup>-4</sup> |

|   |           |             |     |     |      |      |                      |
|---|-----------|-------------|-----|-----|------|------|----------------------|
| 4 | 68091816  | rs28528999  | 2>1 | T/C | 0.72 | 1.27 | 4.3×10 <sup>-4</sup> |
| 4 | 78552172  | rs28884780  | 1>2 | A/G | 0.34 | 1.32 | 4.3×10 <sup>-5</sup> |
| 4 | 84052440  | rs41332145  | 1>2 | C/T | 0.70 | 1.27 | 4.7×10 <sup>-4</sup> |
| 4 | 90095095  | rs180910763 | 1>2 | C/T | 0.80 | 1.34 | 2.4×10 <sup>-4</sup> |
| 4 | 91765642  | rs78416641  | 1>2 | A/C | 0.05 | 1.68 | 2.2×10 <sup>-4</sup> |
| 4 | 121486977 | rs36072791  | 1>2 | A/G | 0.82 | 1.32 | 6.2×10 <sup>-4</sup> |
| 4 | 126112363 | rs186374925 | 1>2 | G/T | 0.95 | 1.74 | 1.3×10 <sup>-4</sup> |
| 4 | 136750399 | rs13139177  | 2>1 | G/A | 0.59 | 1.24 | 6.3×10 <sup>-4</sup> |
| 4 | 138486135 | rs188206537 | 2>1 | A/G | 0.17 | 1.50 | 1.6×10 <sup>-6</sup> |
| 4 | 138534031 | rs141998354 | 2>1 | T/C | 0.19 | 1.45 | 4.6×10 <sup>-6</sup> |
| 4 | 148175509 | rs181321827 | 1>2 | A/G | 0.88 | 1.49 | 7.7×10 <sup>-5</sup> |
| 4 | 166861524 | rs28669377  | 2>1 | T/A | 0.90 | 1.50 | 2.0×10 <sup>-4</sup> |
| 4 | 168716957 | rs191684316 | 2>1 | C/T | 0.06 | 1.80 | 1.5×10 <sup>-5</sup> |
| 4 | 178830486 | rs188918690 | 2>1 | G/C | 0.11 | 1.41 | 5.9×10 <sup>-4</sup> |
| 4 | 184835242 | rs10866265  | 1>2 | C/T | 0.31 | 1.27 | 5.8×10 <sup>-4</sup> |
| 5 | 2089792   | rs139754007 | 2>1 | D/I | 0.38 | 1.24 | 6.3×10 <sup>-4</sup> |
| 5 | 2902999   | rs2860294   | 2>1 | A/G | 0.50 | 1.25 | 2.9×10 <sup>-4</sup> |
| 5 | 18835357  | rs114710558 | 1>2 | T/C | 0.12 | 1.40 | 5.4×10 <sup>-4</sup> |
| 5 | 19488982  | rs13170473  | 2>1 | G/A | 0.44 | 1.24 | 5.3×10 <sup>-4</sup> |
| 5 | 27367354  | rs59371379  | 1>2 | I/D | 0.87 | 1.42 | 1.4×10 <sup>-4</sup> |
| 5 | 27432606  | rs4367265   | 1>2 | A/G | 0.86 | 1.42 | 1.3×10 <sup>-4</sup> |
| 5 | 27609865  | rs55668326  | 1>2 | T/G | 0.85 | 1.45 | 4.0×10 <sup>-5</sup> |
| 5 | 31660006  | rs6861360   | 1>2 | G/A | 0.36 | 1.28 | 2.0×10 <sup>-4</sup> |
| 5 | 67169005  | rs141412809 | 2>1 | C/G | 0.10 | 1.45 | 4.6×10 <sup>-4</sup> |
| 5 | 67950535  | rs10076830  | 2>1 | T/C | 0.94 | 1.61 | 1.9×10 <sup>-4</sup> |
| 5 | 73221549  | rs6453032   | 2>1 | G/T | 0.47 | 1.27 | 1.1×10 <sup>-4</sup> |
| 5 | 98388026  | rs59910509  | 2>1 | A/G | 0.12 | 1.38 | 6.4×10 <sup>-4</sup> |
| 5 | 109204107 | rs2241690   | 2>1 | T/G | 0.66 | 1.26 | 4.4×10 <sup>-4</sup> |
| 5 | 109947984 | rs117569584 | 2>1 | G/A | 0.94 | 1.57 | 4.7×10 <sup>-4</sup> |
| 5 | 118705545 | rs32652     | 2>1 | T/G | 0.38 | 1.27 | 2.0×10 <sup>-4</sup> |
| 5 | 128130002 | rs62391237  | 2>1 | C/T | 0.93 | 1.61 | 6.9×10 <sup>-5</sup> |

|   |           |                |     |     |      |      |                      |
|---|-----------|----------------|-----|-----|------|------|----------------------|
| 5 | 128313080 | rs2577423      | 2>1 | T/C | 0.71 | 1.32 | 6.5×10 <sup>-5</sup> |
| 5 | 129700024 | rs73239262     | 2>1 | T/C | 0.95 | 1.66 | 1.6×10 <sup>-4</sup> |
| 5 | 130810992 | rs149151967    | 2>1 | G/T | 0.95 | 1.64 | 6.5×10 <sup>-4</sup> |
| 5 | 135215554 | rs2269927      | 2>1 | C/T | 0.92 | 1.49 | 4.1×10 <sup>-4</sup> |
| 5 | 136932292 | chr5:136932292 | 2>1 | C/T | 0.05 | 1.73 | 2.1×10 <sup>-4</sup> |
| 5 | 150881537 | rs58610768     | 2>1 | G/A | 0.86 | 1.36 | 5.6×10 <sup>-4</sup> |
| 5 | 163661781 | rs73799291     | 2>1 | G/C | 0.06 | 1.59 | 3.7×10 <sup>-4</sup> |
| 5 | 173273681 | rs3849720      | 2>1 | T/C | 0.23 | 1.39 | 1.6×10 <sup>-5</sup> |
| 6 | 3030410   | rs6596934      | 1>2 | C/G | 0.29 | 1.28 | 5.5×10 <sup>-4</sup> |
| 6 | 9512507   | rs2327189      | 1>2 | T/C | 0.29 | 1.29 | 3.4×10 <sup>-4</sup> |
| 6 | 15936733  | rs6936104      | 2>1 | G/A | 0.91 | 1.43 | 6.2×10 <sup>-4</sup> |
| 6 | 17850142  | rs676296       | 1>2 | A/G | 0.79 | 1.31 | 5.3×10 <sup>-4</sup> |
| 6 | 21506530  | rs6927607      | 2>1 | T/C | 0.75 | 1.29 | 4.1×10 <sup>-4</sup> |
| 6 | 24270120  | rs117831339    | 1>2 | G/A | 0.19 | 1.32 | 6.0×10 <sup>-4</sup> |
| 6 | 31481299  | rs2516399      | 1>2 | A/G | 0.84 | 1.35 | 4.6×10 <sup>-4</sup> |
| 6 | 37649437  | rs62398397     | 1>2 | G/A | 0.55 | 1.27 | 2.6×10 <sup>-4</sup> |
| 6 | 40547677  | rs115546979    | 1>2 | T/C | 0.94 | 1.64 | 2.6×10 <sup>-4</sup> |
| 6 | 43233482  | chr6:43233482  | 2>1 | T/C | 0.99 | 3.27 | 3.9×10 <sup>-5</sup> |
| 6 | 43413575  | rs369686699    | 2>1 | G/A | 0.99 | 3.26 | 4.5×10 <sup>-5</sup> |
| 6 | 45404230  | rs1997992      | 1>2 | T/C | 0.29 | 1.31 | 1.2×10 <sup>-4</sup> |
| 6 | 45922402  | rs3777591      | 1>2 | G/A | 0.23 | 1.30 | 5.2×10 <sup>-4</sup> |
| 6 | 64732017  | rs9344660      | 1>2 | G/A | 0.09 | 1.48 | 4.9×10 <sup>-4</sup> |
| 6 | 70767320  | rs3805997      | 1>2 | G/A | 0.25 | 1.31 | 3.2×10 <sup>-4</sup> |
| 6 | 79912072  | chr6:79912072  | 1>2 | G/T | 0.03 | 2.03 | 4.7×10 <sup>-4</sup> |
| 6 | 80178863  | rs2803183      | 1>2 | T/C | 0.42 | 1.26 | 4.6×10 <sup>-4</sup> |
| 6 | 93467089  | chr6:93467089  | 1>2 | A/C | 0.05 | 1.64 | 5.3×10 <sup>-4</sup> |
| 6 | 101940762 | rs2579944      | 1>2 | A/G | 0.74 | 1.32 | 1.5×10 <sup>-4</sup> |
| 6 | 103295786 | chr6:103295786 | 1>2 | G/A | 0.96 | 1.85 | 2.7×10 <sup>-4</sup> |
| 6 | 117832836 | rs9387485      | 1>2 | C/T | 0.10 | 1.52 | 8.2×10 <sup>-5</sup> |
| 6 | 139039029 | rs9389610      | 1>2 | G/A | 0.57 | 1.26 | 3.8×10 <sup>-4</sup> |
| 6 | 139759781 | rs3010312      | 2>1 | C/A | 0.63 | 1.25 | 4.4×10 <sup>-4</sup> |

|   |           |               |     |     |      |      |                      |
|---|-----------|---------------|-----|-----|------|------|----------------------|
| 6 | 151353805 | rs12183135    | 1>2 | C/G | 0.06 | 1.63 | 4.7×10 <sup>-4</sup> |
| 6 | 154668204 | rs4870278     | 2>1 | T/C | 0.82 | 1.34 | 2.8×10 <sup>-4</sup> |
| 6 | 155315556 | rs13199643    | 1>2 | G/A | 0.37 | 1.33 | 1.2×10 <sup>-5</sup> |
| 6 | 156494674 | rs7774516     | 1>2 | C/G | 0.46 | 1.30 | 3.5×10 <sup>-5</sup> |
| 6 | 156549813 | rs9384441     | 1>2 | A/G | 0.24 | 1.40 | 8.8×10 <sup>-6</sup> |
| 6 | 158295488 | rs181880963   | 2>1 | T/A | 0.94 | 1.57 | 4.5×10 <sup>-4</sup> |
| 6 | 164360807 | rs12193589    | 1>2 | A/G | 0.40 | 1.27 | 2.4×10 <sup>-4</sup> |
| 6 | 166896330 | rs6929010     | 1>2 | T/C | 0.46 | 1.25 | 5.4×10 <sup>-4</sup> |
| 7 | 1632513   | rs13235561    | 1>2 | A/C | 0.16 | 1.38 | 1.7×10 <sup>-4</sup> |
| 7 | 3078035   | rs35049983    | 1>2 | A/G | 0.44 | 1.25 | 4.4×10 <sup>-4</sup> |
| 7 | 3252555   | rs34932678    | 2>1 | A/G | 0.67 | 1.32 | 2.7×10 <sup>-5</sup> |
| 7 | 4224116   | chr7:4224116  | 2>1 | A/G | 0.02 | 2.35 | 4.4×10 <sup>-4</sup> |
| 7 | 7187816   | rs150130341   | 2>1 | T/C | 0.92 | 1.52 | 4.2×10 <sup>-4</sup> |
| 7 | 8189620   | rs3757524     | 1>2 | C/T | 0.21 | 1.32 | 3.7×10 <sup>-4</sup> |
| 7 | 9619380   | rs2259306     | 2>1 | C/T | 0.58 | 1.24 | 5.5×10 <sup>-4</sup> |
| 7 | 13907827  | rs251994      | 2>1 | C/T | 0.53 | 1.24 | 3.7×10 <sup>-4</sup> |
| 7 | 13945127  | rs2237295     | 2>1 | C/T | 0.41 | 1.25 | 3.8×10 <sup>-4</sup> |
| 7 | 20021609  | rs6956048     | 1>2 | C/A | 0.52 | 1.25 | 4.7×10 <sup>-4</sup> |
| 7 | 23997775  | rs57329175    | 2>1 | C/T | 0.93 | 1.52 | 5.8×10 <sup>-4</sup> |
| 7 | 24958042  | rs120         | 2>1 | A/G | 0.25 | 1.30 | 1.9×10 <sup>-4</sup> |
| 7 | 26122034  | rs17153193    | 2>1 | T/C | 0.70 | 1.30 | 1.3×10 <sup>-4</sup> |
| 7 | 28485676  | rs17156696    | 2>1 | T/A | 0.32 | 1.26 | 5.3×10 <sup>-4</sup> |
| 7 | 28547048  | rs12333835    | 1>2 | C/T | 0.23 | 1.33 | 1.8×10 <sup>-4</sup> |
| 7 | 29668519  | rs16875105    | 2>1 | A/G | 0.19 | 1.31 | 4.6×10 <sup>-4</sup> |
| 7 | 38673833  | rs9918553     | 2>1 | A/G | 0.67 | 1.25 | 6.7×10 <sup>-4</sup> |
| 7 | 43272084  | rs181157662   | 2>1 | T/C | 0.18 | 1.35 | 1.8×10 <sup>-4</sup> |
| 7 | 45982233  | chr7:45982233 | 2>1 | A/G | 0.06 | 1.59 | 4.2×10 <sup>-4</sup> |
| 7 | 51682401  | rs4947627     | 1>2 | A/G | 0.16 | 1.36 | 3.9×10 <sup>-4</sup> |
| 7 | 73141464  | rs2030922     | 1>2 | C/T | 0.47 | 1.29 | 5.8×10 <sup>-5</sup> |
| 7 | 93816686  | rs80145019    | 1>2 | C/A | 0.29 | 1.30 | 2.0×10 <sup>-4</sup> |
| 7 | 95897827  | rs142857687   | 1>2 | A/T | 0.18 | 1.33 | 5.5×10 <sup>-4</sup> |

|   |           |               |     |     |      |      |                      |
|---|-----------|---------------|-----|-----|------|------|----------------------|
| 7 | 103023537 | rs10268808    | 1>2 | A/C | 0.34 | 1.26 | 5.2×10 <sup>-4</sup> |
| 7 | 103193651 | rs2711879     | 1>2 | C/T | 0.40 | 1.29 | 7.2×10 <sup>-5</sup> |
| 7 | 121304227 | rs187383253   | 2>1 | C/A | 0.91 | 1.48 | 2.2×10 <sup>-4</sup> |
| 7 | 130404776 | rs4067228     | 1>2 | A/G | 0.50 | 1.25 | 4.7×10 <sup>-4</sup> |
| 7 | 135575461 | rs62489095    | 2>1 | C/A | 0.07 | 1.53 | 3.4×10 <sup>-4</sup> |
| 7 | 143602779 | rs6947163     | 1>2 | G/T | 0.15 | 1.38 | 3.7×10 <sup>-4</sup> |
| 7 | 149988544 | rs147486244   | 2>1 | G/A | 0.63 | 1.28 | 1.4×10 <sup>-4</sup> |
| 8 | 2838945   | rs656466      | 2>1 | C/G | 0.12 | 1.39 | 5.5×10 <sup>-4</sup> |
| 8 | 3026578   | rs10503198    | 2>1 | C/G | 0.28 | 1.32 | 6.4×10 <sup>-5</sup> |
| 8 | 3106370   | rs79693896    | 2>1 | T/A | 0.88 | 1.40 | 5.5×10 <sup>-4</sup> |
| 8 | 3290516   | rs2406295     | 2>1 | C/G | 0.90 | 1.45 | 2.4×10 <sup>-4</sup> |
| 8 | 3341226   | rs79915250    | 2>1 | C/T | 0.93 | 1.52 | 4.2×10 <sup>-4</sup> |
| 8 | 3904192   | rs3849818     | 1>2 | T/G | 0.20 | 1.32 | 6.2×10 <sup>-4</sup> |
| 8 | 6042400   | rs1834203     | 2>1 | T/C | 0.50 | 1.27 | 1.3×10 <sup>-4</sup> |
| 8 | 6709922   | rs2951864     | 2>1 | C/G | 0.46 | 1.25 | 2.8×10 <sup>-4</sup> |
| 8 | 8328109   | rs2921039     | 1>2 | G/C | 0.11 | 1.44 | 3.3×10 <sup>-4</sup> |
| 8 | 11439961  | rs11250149    | 1>2 | C/G | 0.25 | 1.35 | 6.0×10 <sup>-5</sup> |
| 8 | 12786947  | chr8:12786947 | 1>2 | T/C | 0.05 | 1.75 | 2.1×10 <sup>-4</sup> |
| 8 | 13209750  | rs76989997    | 1>2 | C/T | 0.52 | 1.25 | 5.4×10 <sup>-4</sup> |
| 8 | 13243084  | rs1481679     | 1>2 | A/G | 0.55 | 1.26 | 4.2×10 <sup>-4</sup> |
| 8 | 14443650  | rs10086949    | 1>2 | T/G | 0.41 | 1.28 | 1.7×10 <sup>-4</sup> |
| 8 | 27769687  | rs35857051    | 1>2 | T/C | 0.39 | 1.25 | 6.0×10 <sup>-4</sup> |
| 8 | 35956929  | chr8:35956929 | 1>2 | A/T | 0.06 | 1.61 | 4.9×10 <sup>-4</sup> |
| 8 | 55308198  | rs12546306    | 1>2 | C/T | 0.68 | 1.27 | 6.2×10 <sup>-4</sup> |
| 8 | 62495263  | rs6471961     | 1>2 | T/C | 0.77 | 1.30 | 3.8×10 <sup>-4</sup> |
| 8 | 62634563  | rs149447795   | 1>2 | T/C | 0.19 | 1.37 | 1.7×10 <sup>-4</sup> |
| 8 | 62663272  | rs199622822   | 1>2 | D/I | 0.20 | 1.37 | 1.1×10 <sup>-4</sup> |
| 8 | 70653945  | rs182136050   | 2>1 | T/G | 0.16 | 1.38 | 1.3×10 <sup>-4</sup> |
| 8 | 70692868  | rs138718121   | 2>1 | T/A | 0.17 | 1.37 | 1.1×10 <sup>-4</sup> |
| 8 | 81365072  | chr8:81365072 | 1>2 | A/G | 0.93 | 1.67 | 1.1×10 <sup>-4</sup> |
| 8 | 87327440  | rs148141053   | 1>2 | T/G | 0.12 | 1.42 | 3.8×10 <sup>-4</sup> |

|   |           |               |     |     |      |      |                      |
|---|-----------|---------------|-----|-----|------|------|----------------------|
| 8 | 89008404  | rs180694224   | 2>1 | A/G | 0.92 | 1.48 | 5.1×10 <sup>-4</sup> |
| 8 | 93586384  | rs2595612     | 1>2 | T/C | 0.06 | 1.63 | 2.8×10 <sup>-4</sup> |
| 8 | 99455167  | rs201599771   | 1>2 | D/I | 0.88 | 1.47 | 7.2×10 <sup>-5</sup> |
| 8 | 100002032 | rs79434662    | 1>2 | G/A | 0.88 | 1.49 | 3.5×10 <sup>-5</sup> |
| 8 | 100709154 | rs140502344   | 1>2 | A/G | 0.87 | 1.41 | 2.9×10 <sup>-4</sup> |
| 8 | 109912830 | rs4734184     | 2>1 | A/G | 0.83 | 1.32 | 6.6×10 <sup>-4</sup> |
| 8 | 111025983 | rs55893742    | 1>2 | A/G | 0.03 | 2.08 | 5.5×10 <sup>-5</sup> |
| 8 | 124987478 | rs7465584     | 2>1 | C/T | 0.37 | 1.29 | 8.5×10 <sup>-5</sup> |
| 8 | 136671060 | rs4243847     | 2>1 | A/G | 0.41 | 1.25 | 4.8×10 <sup>-4</sup> |
| 8 | 136682479 | rs4075568     | 2>1 | C/T | 0.54 | 1.30 | 2.7×10 <sup>-5</sup> |
| 9 | 538401    | rs10975042    | 2>1 | C/T | 0.19 | 1.35 | 1.2×10 <sup>-4</sup> |
| 9 | 4375454   | rs2039194     | 1>2 | G/C | 0.82 | 1.33 | 6.0×10 <sup>-4</sup> |
| 9 | 5498562   | rs34719356    | 2>1 | D/I | 0.34 | 1.25 | 6.5×10 <sup>-4</sup> |
| 9 | 8726153   | rs1473822     | 2>1 | C/T | 0.66 | 1.28 | 1.6×10 <sup>-4</sup> |
| 9 | 8924538   | rs1368684     | 2>1 | C/T | 0.26 | 1.34 | 3.0×10 <sup>-5</sup> |
| 9 | 9028285   | rs324496      | 2>1 | T/C | 0.74 | 1.28 | 5.5×10 <sup>-4</sup> |
| 9 | 9173304   | rs968079      | 2>1 | G/A | 0.23 | 1.31 | 2.6×10 <sup>-4</sup> |
| 9 | 9191639   | rs62529522    | 2>1 | T/C | 0.68 | 1.30 | 7.5×10 <sup>-5</sup> |
| 9 | 11876599  | rs192161934   | 1>2 | T/G | 0.08 | 1.51 | 4.5×10 <sup>-4</sup> |
| 9 | 25335125  | rs113501731   | 1>2 | A/C | 0.15 | 1.42 | 7.5×10 <sup>-5</sup> |
| 9 | 28393919  | rs143327236   | 2>1 | G/A | 0.04 | 1.76 | 1.8×10 <sup>-4</sup> |
| 9 | 29789814  | rs950316      | 2>1 | G/A | 0.52 | 1.25 | 3.0×10 <sup>-4</sup> |
| 9 | 32194564  | rs188065424   | 2>1 | G/A | 0.75 | 1.31 | 2.2×10 <sup>-4</sup> |
| 9 | 32320727  | chr9:32320727 | 2>1 | T/C | 0.96 | 1.72 | 4.9×10 <sup>-4</sup> |
| 9 | 80709044  | rs62573096    | 2>1 | G/A | 0.26 | 1.29 | 4.5×10 <sup>-4</sup> |
| 9 | 81158113  | rs7027911     | 1>2 | G/A | 0.55 | 1.27 | 1.8×10 <sup>-4</sup> |
| 9 | 87132349  | rs35342431    | 2>1 | I/D | 0.78 | 1.30 | 4.8×10 <sup>-4</sup> |
| 9 | 90719044  | rs56257218    | 1>2 | G/A | 0.07 | 1.54 | 5.7×10 <sup>-4</sup> |
| 9 | 98252899  | chr9:98252899 | 1>2 | D/I | 0.86 | 1.38 | 5.0×10 <sup>-4</sup> |
| 9 | 101490087 | rs337570      | 2>1 | C/T | 0.62 | 1.25 | 4.8×10 <sup>-4</sup> |
| 9 | 105695436 | rs79931339    | 1>2 | A/C | 0.79 | 1.32 | 5.2×10 <sup>-4</sup> |

|    |           |                |     |     |      |      |                      |
|----|-----------|----------------|-----|-----|------|------|----------------------|
| 9  | 113085232 | rs17807186     | 2>1 | G/A | 0.35 | 1.28 | 1.5×10 <sup>-4</sup> |
| 9  | 129468586 | rs13299536     | 2>1 | A/G | 0.32 | 1.29 | 1.1×10 <sup>-4</sup> |
| 9  | 135277259 | rs186468471    | 1>2 | T/C | 0.99 | 2.78 | 3.1×10 <sup>-4</sup> |
| 9  | 137514801 | rs57187152     | 1>2 | C/T | 0.08 | 1.54 | 1.8×10 <sup>-4</sup> |
| 9  | 138995207 | rs59623632     | 1>2 | A/G | 0.28 | 1.31 | 1.4×10 <sup>-4</sup> |
| 9  | 140143728 | rs201094187    | 2>1 | D/I | 0.14 | 1.40 | 2.7×10 <sup>-4</sup> |
| 10 | 8277297   | rs192871141    | 2>1 | A/C | 0.91 | 1.44 | 5.0×10 <sup>-4</sup> |
| 10 | 9034011   | rs12776100     | 2>1 | C/A | 0.73 | 1.28 | 4.9×10 <sup>-4</sup> |
| 10 | 13861399  | rs72771044     | 1>2 | A/T | 0.55 | 1.29 | 1.0×10 <sup>-4</sup> |
| 10 | 14134826  | rs789767       | 1>2 | T/G | 0.68 | 1.30 | 1.3×10 <sup>-4</sup> |
| 10 | 14818870  | rs12256790     | 1>2 | G/A | 0.72 | 1.35 | 3.1×10 <sup>-5</sup> |
| 10 | 14991430  | rs7906967      | 1>2 | C/A | 0.32 | 1.33 | 5.1×10 <sup>-5</sup> |
| 10 | 23217727  | rs10828375     | 2>1 | G/T | 0.30 | 1.28 | 2.9×10 <sup>-4</sup> |
| 10 | 23342159  | rs4237359      | 2>1 | G/A | 0.60 | 1.28 | 1.0×10 <sup>-4</sup> |
| 10 | 25528562  | rs4749015      | 2>1 | A/G | 0.82 | 1.34 | 2.6×10 <sup>-4</sup> |
| 10 | 32549517  | rs76220129     | 1>2 | C/G | 0.07 | 1.59 | 2.8×10 <sup>-4</sup> |
| 10 | 72276664  | chr10:72276664 | 2>1 | C/G | 0.01 | 2.47 | 5.2×10 <sup>-4</sup> |
| 10 | 72494629  | rs4747092      | 1>2 | G/A | 0.45 | 1.31 | 2.4×10 <sup>-5</sup> |
| 10 | 73334219  | rs144584204    | 1>2 | I/D | 0.10 | 1.46 | 4.2×10 <sup>-4</sup> |
| 10 | 73398722  | rs61650587     | 1>2 | G/A | 0.78 | 1.32 | 2.3×10 <sup>-4</sup> |
| 10 | 73483645  | rs3802713      | 1>2 | T/C | 0.18 | 1.35 | 3.8×10 <sup>-4</sup> |
| 10 | 78670661  | rs1907746      | 1>2 | G/A | 0.81 | 1.34 | 2.4×10 <sup>-4</sup> |
| 10 | 78773064  | rs74948619     | 1>2 | G/A | 0.77 | 1.32 | 2.3×10 <sup>-4</sup> |
| 10 | 87300091  | rs1912299      | 2>1 | T/C | 0.74 | 1.28 | 4.7×10 <sup>-4</sup> |
| 10 | 89474072  | rs2302404      | 1>2 | C/T | 0.90 | 1.44 | 4.9×10 <sup>-4</sup> |
| 10 | 89593380  | rs151154388    | 1>2 | T/C | 0.87 | 1.44 | 1.2×10 <sup>-4</sup> |
| 10 | 92756381  | rs35945428     | 2>1 | G/T | 0.64 | 1.26 | 3.3×10 <sup>-4</sup> |
| 10 | 95982217  | rs4918159      | 2>1 | A/G | 0.48 | 1.24 | 4.1×10 <sup>-4</sup> |
| 10 | 97484887  | rs34826225     | 2>1 | I/D | 0.70 | 1.31 | 6.3×10 <sup>-5</sup> |
| 10 | 97603178  | rs3181129      | 2>1 | T/G | 0.72 | 1.28 | 2.8×10 <sup>-4</sup> |
| 10 | 97734022  | rs10509696     | 2>1 | T/C | 0.65 | 1.25 | 4.4×10 <sup>-4</sup> |



|    |           |                |     |     |      |      |                      |
|----|-----------|----------------|-----|-----|------|------|----------------------|
| 10 | 101366135 | rs5787355      | 1>2 | D/I | 0.39 | 1.28 | 1.7×10 <sup>-4</sup> |
| 10 | 101433770 | rs55714089     | 1>2 | D/I | 0.40 | 1.25 | 4.4×10 <sup>-4</sup> |
| 10 | 101558746 | rs2756109      | 1>2 | G/T | 0.55 | 1.27 | 2.2×10 <sup>-4</sup> |
| 10 | 114272761 | rs12780297     | 1>2 | T/G | 0.19 | 1.32 | 6.3×10 <sup>-4</sup> |
| 10 | 121029044 | rs61874482     | 2>1 | A/G | 0.10 | 1.46 | 2.8×10 <sup>-4</sup> |
| 10 | 123804177 | rs192412818    | 2>1 | G/A | 0.90 | 1.47 | 2.2×10 <sup>-4</sup> |
| 10 | 131059102 | rs12573583     | 2>1 | C/G | 0.92 | 1.61 | 2.4×10 <sup>-5</sup> |
| 11 | 2189185   | rs4074905      | 2>1 | G/A | 0.21 | 1.31 | 4.1×10 <sup>-4</sup> |
| 11 | 2206387   | rs11564707     | 1>2 | G/C | 0.43 | 1.39 | 2.4×10 <sup>-7</sup> |
| 11 | 2286243   | rs739543       | 1>2 | A/G | 0.44 | 1.26 | 3.3×10 <sup>-4</sup> |
| 11 | 2857194   | rs2237895      | 1>2 | C/A | 0.49 | 1.40 | 1.9×10 <sup>-7</sup> |
| 11 | 2868868   | rs79788804     | 2>1 | A/G | 0.36 | 1.30 | 6.2×10 <sup>-5</sup> |
| 11 | 2931981   | rs450208       | 1>2 | T/G | 0.69 | 1.33 | 3.3×10 <sup>-5</sup> |
| 11 | 5463425   | rs16931041     | 2>1 | T/C | 0.81 | 1.32 | 3.0×10 <sup>-4</sup> |
| 11 | 11205233  | rs2722772      | 2>1 | A/G | 0.50 | 1.28 | 6.5×10 <sup>-5</sup> |
| 11 | 12309002  | rs3736304      | 1>2 | C/T | 0.57 | 1.28 | 1.5×10 <sup>-4</sup> |
| 11 | 20388097  | rs7928503      | 1>2 | G/A | 0.73 | 1.29 | 3.8×10 <sup>-4</sup> |
| 11 | 22781497  | rs12422017     | 2>1 | T/C | 0.63 | 1.26 | 3.8×10 <sup>-4</sup> |
| 11 | 27526304  | rs114388342    | 2>1 | T/C | 0.04 | 1.72 | 5.2×10 <sup>-4</sup> |
| 11 | 43255059  | rs140092128    | 1>2 | G/C | 0.13 | 1.40 | 4.6×10 <sup>-4</sup> |
| 11 | 61183329  | rs17156014     | 1>2 | C/T | 0.25 | 1.30 | 4.9×10 <sup>-4</sup> |
| 11 | 62528410  | chr11:62528410 | 1>2 | I/D | 0.98 | 2.18 | 3.8×10 <sup>-4</sup> |
| 11 | 63017480  | rs118020373    | 1>2 | C/A | 0.73 | 1.31 | 2.4×10 <sup>-4</sup> |
| 11 | 63215235  | rs116986544    | 1>2 | G/T | 0.81 | 1.32 | 5.9×10 <sup>-4</sup> |
| 11 | 68833565  | rs189122876    | 2>1 | C/T | 0.14 | 1.39 | 2.6×10 <sup>-4</sup> |
| 11 | 69448373  | rs654240       | 2>1 | T/C | 0.40 | 1.27 | 1.6×10 <sup>-4</sup> |
| 11 | 70518864  | rs7104178      | 1>2 | A/G | 0.73 | 1.30 | 4.6×10 <sup>-4</sup> |
| 11 | 70968452  | rs117835161    | 1>2 | A/G | 0.22 | 1.46 | 1.3×10 <sup>-6</sup> |
| 11 | 71019766  | rs1660861      | 1>2 | T/C | 0.61 | 1.26 | 3.7×10 <sup>-4</sup> |
| 11 | 77999865  | chr11:77999865 | 2>1 | G/A | 0.05 | 1.78 | 7.2×10 <sup>-5</sup> |
| 11 | 79415407  | rs2105527      | 2>1 | T/C | 0.07 | 1.62 | 8.0×10 <sup>-5</sup> |

|    |           |                 |     |     |      |      |                      |
|----|-----------|-----------------|-----|-----|------|------|----------------------|
| 11 | 81582466  | rs149635064     | 2>1 | C/T | 0.07 | 1.53 | 5.9×10 <sup>-4</sup> |
| 11 | 86628005  | rs4944640       | 2>1 | C/T | 0.36 | 1.31 | 3.5×10 <sup>-5</sup> |
| 11 | 110693356 | rs184443        | 1>2 | G/A | 0.33 | 1.26 | 5.9×10 <sup>-4</sup> |
| 11 | 112353922 | chr11:112353922 | 1>2 | A/T | 0.96 | 1.75 | 2.9×10 <sup>-4</sup> |
| 11 | 112476540 | rs4291707       | 1>2 | G/T | 0.94 | 1.71 | 4.5×10 <sup>-5</sup> |
| 11 | 113964043 | rs77660877      | 2>1 | C/T | 0.85 | 1.35 | 5.4×10 <sup>-4</sup> |
| 11 | 115658805 | rs74369070      | 1>2 | G/A | 0.86 | 1.43 | 9.5×10 <sup>-5</sup> |
| 11 | 119239689 | rs680268        | 2>1 | T/C | 0.86 | 1.37 | 4.0×10 <sup>-4</sup> |
| 11 | 126285301 | rs7949566       | 1>2 | G/A | 0.53 | 1.28 | 1.1×10 <sup>-4</sup> |
| 11 | 126601540 | rs10893557      | 1>2 | G/T | 0.31 | 1.28 | 3.6×10 <sup>-4</sup> |
| 12 | 3352183   | rs77587         | 2>1 | G/C | 0.53 | 1.25 | 2.9×10 <sup>-4</sup> |
| 12 | 4150894   | rs78555230      | 2>1 | C/T | 0.06 | 1.65 | 8.5×10 <sup>-5</sup> |
| 12 | 12823025  | rs143606772     | 2>1 | C/T | 0.63 | 1.25 | 4.7×10 <sup>-4</sup> |
| 12 | 17571193  | rs183764686     | 1>2 | G/A | 0.05 | 1.71 | 3.6×10 <sup>-4</sup> |
| 12 | 43990838  | rs60167591      | 2>1 | I/D | 0.61 | 1.25 | 4.2×10 <sup>-4</sup> |
| 12 | 44023884  | rs1478618       | 2>1 | A/G | 0.58 | 1.24 | 5.2×10 <sup>-4</sup> |
| 12 | 57856493  | rs78179158      | 1>2 | G/A | 0.19 | 1.37 | 1.3×10 <sup>-4</sup> |
| 12 | 58197231  | rs60780489      | 1>2 | T/G | 0.24 | 1.30 | 5.2×10 <sup>-4</sup> |
| 12 | 63450335  | rs3913041       | 2>1 | A/G | 0.60 | 1.26 | 2.8×10 <sup>-4</sup> |
| 12 | 81141539  | rs1603216       | 1>2 | G/A | 0.86 | 1.38 | 4.7×10 <sup>-4</sup> |
| 12 | 107743313 | rs76454120      | 1>2 | C/T | 0.69 | 1.27 | 6.2×10 <sup>-4</sup> |
| 12 | 117815549 | rs526159        | 2>1 | G/A | 0.86 | 1.37 | 2.6×10 <sup>-4</sup> |
| 12 | 128537287 | rs7975535       | 1>2 | T/C | 0.34 | 1.28 | 2.3×10 <sup>-4</sup> |
| 12 | 128709513 | rs11059588      | 2>1 | G/T | 0.55 | 1.33 | 9.1×10 <sup>-6</sup> |
| 12 | 129704082 | rs78134285      | 2>1 | T/G | 0.06 | 1.56 | 5.7×10 <sup>-4</sup> |
| 13 | 32569815  | rs121046        | 2>1 | G/A | 0.46 | 1.24 | 5.5×10 <sup>-4</sup> |
| 13 | 39279459  | rs56255874      | 2>1 | A/G | 0.64 | 1.27 | 1.9×10 <sup>-4</sup> |
| 13 | 40803985  | rs71425795      | 1>2 | C/T | 0.32 | 1.28 | 2.8×10 <sup>-4</sup> |
| 13 | 46342822  | rs4942430       | 2>1 | C/A | 0.82 | 1.33 | 4.0×10 <sup>-4</sup> |
| 13 | 54432416  | rs1841058       | 1>2 | C/T | 0.79 | 1.32 | 4.0×10 <sup>-4</sup> |
| 13 | 92982848  | chr13:92982848  | 2>1 | D/I | 0.08 | 1.54 | 2.9×10 <sup>-4</sup> |

|    |           |                |     |     |      |      |                      |
|----|-----------|----------------|-----|-----|------|------|----------------------|
| 13 | 93363027  | chr13:93363027 | 2>1 | G/C | 0.08 | 1.60 | 6.9×10 <sup>-5</sup> |
| 13 | 93586124  | chr13:93586124 | 2>1 | C/T | 0.07 | 1.59 | 1.1×10 <sup>-4</sup> |
| 13 | 93955178  | chr13:93955178 | 2>1 | T/C | 0.08 | 1.58 | 1.0×10 <sup>-4</sup> |
| 13 | 94070190  | chr13:94070190 | 2>1 | C/T | 0.08 | 1.52 | 3.5×10 <sup>-4</sup> |
| 13 | 94634966  | chr13:94634966 | 2>1 | A/G | 0.08 | 1.55 | 1.5×10 <sup>-4</sup> |
| 13 | 98833517  | rs7986669      | 2>1 | C/T | 0.93 | 1.55 | 3.2×10 <sup>-4</sup> |
| 13 | 100390236 | rs17577153     | 2>1 | A/G | 0.88 | 1.47 | 5.4×10 <sup>-5</sup> |
| 13 | 100456122 | rs2390357      | 2>1 | A/G | 0.16 | 1.37 | 2.2×10 <sup>-4</sup> |
| 13 | 101064282 | rs12429310     | 1>2 | G/A | 0.85 | 1.38 | 2.8×10 <sup>-4</sup> |
| 13 | 105339826 | rs701565       | 1>2 | A/C | 0.44 | 1.25 | 5.2×10 <sup>-4</sup> |
| 13 | 105898262 | rs16966166     | 2>1 | C/T | 0.62 | 1.26 | 2.3×10 <sup>-4</sup> |
| 14 | 33131189  | rs12895513     | 1>2 | A/G | 0.58 | 1.24 | 5.9×10 <sup>-4</sup> |
| 14 | 33152745  | rs11156756     | 1>2 | A/G | 0.45 | 1.26 | 2.8×10 <sup>-4</sup> |
| 14 | 41767938  | rs1778367      | 1>2 | T/G | 0.11 | 1.43 | 3.4×10 <sup>-4</sup> |
| 14 | 77396193  | rs112854307    | 2>1 | D/I | 0.20 | 1.32 | 3.4×10 <sup>-4</sup> |
| 14 | 78205694  | rs185044034    | 1>2 | C/T | 0.91 | 1.47 | 5.2×10 <sup>-4</sup> |
| 14 | 80185987  | rs178388       | 2>1 | A/C | 0.25 | 1.34 | 5.6×10 <sup>-5</sup> |
| 14 | 82431921  | rs74963973     | 2>1 | C/T | 0.08 | 1.50 | 2.4×10 <sup>-4</sup> |
| 14 | 103463561 | rs7157813      | 1>2 | A/G | 0.87 | 1.44 | 2.0×10 <sup>-4</sup> |
| 15 | 26153832  | rs1877249      | 2>1 | A/G | 0.39 | 1.24 | 5.9×10 <sup>-4</sup> |
| 15 | 26186978  | rs71463472     | 2>1 | A/C | 0.10 | 1.44 | 4.6×10 <sup>-4</sup> |
| 15 | 26273281  | rs72625124     | 1>2 | T/G | 0.89 | 1.44 | 3.9×10 <sup>-4</sup> |
| 15 | 32337237  | rs4779563      | 2>1 | T/C | 0.63 | 1.29 | 7.7×10 <sup>-5</sup> |
| 15 | 39163687  | rs11632328     | 1>2 | T/C | 0.49 | 1.27 | 1.6×10 <sup>-4</sup> |
| 15 | 39641049  | rs74634178     | 2>1 | C/T | 0.96 | 1.87 | 8.3×10 <sup>-5</sup> |
| 15 | 53879272  | rs4447369      | 1>2 | C/T | 0.72 | 1.29 | 2.8×10 <sup>-4</sup> |
| 15 | 54757794  | rs57385376     | 2>1 | A/C | 0.88 | 1.39 | 4.9×10 <sup>-4</sup> |
| 15 | 58132503  | rs6493957      | 1>2 | G/T | 0.58 | 1.26 | 2.7×10 <sup>-4</sup> |
| 15 | 58838440  | rs1973024      | 1>2 | T/C | 0.37 | 1.26 | 4.0×10 <sup>-4</sup> |
| 15 | 63595545  | rs72212605     | 1>2 | D/I | 0.71 | 1.28 | 4.8×10 <sup>-4</sup> |
| 15 | 74408580  | rs117223627    | 1>2 | C/T | 0.90 | 1.48 | 1.6×10 <sup>-4</sup> |

|    |          |                |     |     |      |      |                      |
|----|----------|----------------|-----|-----|------|------|----------------------|
| 15 | 74903614 | rs140284162    | 1>2 | G/C | 0.96 | 1.81 | 1.5×10 <sup>-4</sup> |
| 15 | 79488593 | rs7170146      | 1>2 | A/G | 0.56 | 1.30 | 4.9×10 <sup>-5</sup> |
| 15 | 80818730 | rs147006180    | 1>2 | G/C | 0.15 | 1.38 | 3.3×10 <sup>-4</sup> |
| 15 | 82391732 | rs11073033     | 1>2 | A/G | 0.14 | 1.39 | 3.6×10 <sup>-4</sup> |
| 15 | 86103176 | rs16941432     | 1>2 | G/A | 0.29 | 1.32 | 7.4×10 <sup>-5</sup> |
| 15 | 87333293 | rs16977987     | 1>2 | G/A | 0.74 | 1.28 | 5.7×10 <sup>-4</sup> |
| 15 | 87422428 | rs57116355     | 1>2 | C/T | 0.77 | 1.30 | 4.6×10 <sup>-4</sup> |
| 15 | 88044080 | rs34297582     | 2>1 | A/G | 0.76 | 1.30 | 2.9×10 <sup>-4</sup> |
| 15 | 89180915 | rs10152159     | 1>2 | C/T | 0.45 | 1.26 | 3.2×10 <sup>-4</sup> |
| 15 | 91990598 | rs34901612     | 2>1 | G/A | 0.16 | 1.34 | 5.9×10 <sup>-4</sup> |
| 15 | 98701022 | rs977832       | 2>1 | T/C | 0.89 | 1.48 | 9.2×10 <sup>-5</sup> |
| 16 | 322345   | rs74003728     | 2>1 | C/T | 0.95 | 1.71 | 1.9×10 <sup>-4</sup> |
| 16 | 370443   | rs117116749    | 1>2 | A/G | 0.02 | 2.45 | 3.0×10 <sup>-4</sup> |
| 16 | 4060661  | rs2239310      | 2>1 | A/G | 0.26 | 1.28 | 4.6×10 <sup>-4</sup> |
| 16 | 6328022  | rs2160166      | 2>1 | T/C | 0.17 | 1.36 | 2.1×10 <sup>-4</sup> |
| 16 | 6916942  | chr16:6916942  | 2>1 | C/A | 0.04 | 1.81 | 3.1×10 <sup>-4</sup> |
| 16 | 7700265  | rs184543795    | 1>2 | G/A | 0.12 | 1.43 | 3.7×10 <sup>-4</sup> |
| 16 | 13355924 | rs78178451     | 1>2 | C/T | 0.10 | 1.45 | 4.3×10 <sup>-4</sup> |
| 16 | 17842398 | rs12598358     | 2>1 | G/A | 0.89 | 1.44 | 2.4×10 <sup>-4</sup> |
| 16 | 18863882 | rs74337241     | 1>2 | A/G | 0.95 | 1.72 | 4.8×10 <sup>-4</sup> |
| 16 | 24325877 | chr16:24325877 | 2>1 | T/A | 0.96 | 1.71 | 5.2×10 <sup>-4</sup> |
| 16 | 51106209 | rs4785498      | 2>1 | T/C | 0.65 | 1.33 | 1.6×10 <sup>-5</sup> |
| 16 | 52065724 | rs1345322      | 2>1 | G/A | 0.57 | 1.25 | 3.8×10 <sup>-4</sup> |
| 16 | 52169755 | rs4785094      | 2>1 | G/A | 0.69 | 1.31 | 4.4×10 <sup>-5</sup> |
| 16 | 52261784 | rs13337467     | 2>1 | G/T | 0.65 | 1.33 | 1.2×10 <sup>-5</sup> |
| 16 | 52424157 | rs187680       | 2>1 | A/C | 0.46 | 1.30 | 2.4×10 <sup>-5</sup> |
| 16 | 53606724 | chr16:53606724 | 1>2 | G/C | 0.04 | 1.78 | 5.9×10 <sup>-4</sup> |
| 16 | 53987525 | chr16:53987525 | 1>2 | T/A | 0.04 | 2.00 | 2.4×10 <sup>-5</sup> |
| 16 | 56223793 | rs3859112      | 1>2 | C/T | 0.17 | 1.36 | 3.8×10 <sup>-4</sup> |
| 16 | 56308431 | rs12600108     | 1>2 | A/C | 0.27 | 1.31 | 1.3×10 <sup>-4</sup> |
| 16 | 56944947 | rs75109156     | 1>2 | A/G | 0.76 | 1.28 | 6.3×10 <sup>-4</sup> |

|    |          |                |     |     |      |      |                      |
|----|----------|----------------|-----|-----|------|------|----------------------|
| 16 | 61291839 | rs16963175     | 1>2 | A/G | 0.86 | 1.44 | 6.1×10 <sup>-5</sup> |
| 16 | 68867456 | rs1801026      | 2>1 | T/C | 0.26 | 1.32 | 9.1×10 <sup>-5</sup> |
| 16 | 73375719 | rs4346228      | 2>1 | G/A | 0.54 | 1.24 | 5.5×10 <sup>-4</sup> |
| 16 | 74062203 | rs2716591      | 2>1 | C/T | 0.87 | 1.50 | 1.3×10 <sup>-5</sup> |
| 16 | 79061586 | chr16:79061586 | 2>1 | T/C | 0.95 | 1.67 | 5.8×10 <sup>-4</sup> |
| 16 | 85822447 | chr16:85822447 | 1>2 | T/C | 0.95 | 1.76 | 3.4×10 <sup>-4</sup> |
| 16 | 86119528 | rs9935120      | 2>1 | T/C | 0.17 | 1.33 | 4.2×10 <sup>-4</sup> |
| 16 | 86120025 | rs4843903      | 1>2 | T/C | 0.44 | 1.25 | 5.6×10 <sup>-4</sup> |
| 17 | 2295633  | rs2429919      | 2>1 | C/A | 0.70 | 1.27 | 4.7×10 <sup>-4</sup> |
| 17 | 5846281  | rs967787       | 2>1 | A/G | 0.41 | 1.24 | 6.6×10 <sup>-4</sup> |
| 17 | 12562530 | rs12603774     | 1>2 | T/C | 0.43 | 1.29 | 7.8×10 <sup>-5</sup> |
| 17 | 48457722 | rs77309724     | 2>1 | G/C | 0.90 | 1.42 | 6.7×10 <sup>-4</sup> |
| 17 | 52943191 | rs16955263     | 2>1 | A/G | 0.61 | 1.26 | 5.0×10 <sup>-4</sup> |
| 17 | 55604097 | rs74401513     | 2>1 | T/C | 0.95 | 1.65 | 5.8×10 <sup>-4</sup> |
| 17 | 57556414 | rs9890999      | 2>1 | C/T | 0.51 | 1.25 | 3.8×10 <sup>-4</sup> |
| 17 | 58149745 | rs3744375      | 2>1 | A/G | 0.67 | 1.34 | 1.1×10 <sup>-5</sup> |
| 17 | 58212091 | rs345171       | 2>1 | T/C | 0.77 | 1.31 | 3.5×10 <sup>-4</sup> |
| 17 | 58749017 | chr17:58749017 | 2>1 | C/G | 0.96 | 1.80 | 3.1×10 <sup>-4</sup> |
| 17 | 58965766 | chr17:58965766 | 2>1 | C/T | 0.96 | 1.81 | 3.0×10 <sup>-4</sup> |
| 17 | 59214727 | chr17:59214727 | 2>1 | A/G | 0.95 | 1.74 | 3.1×10 <sup>-4</sup> |
| 17 | 63477337 | rs187812044    | 1>2 | G/A | 0.15 | 1.37 | 3.4×10 <sup>-4</sup> |
| 17 | 63722528 | rs4346239      | 1>2 | G/A | 0.53 | 1.28 | 9.0×10 <sup>-5</sup> |
| 17 | 71943095 | rs145834533    | 2>1 | C/T | 0.36 | 1.25 | 4.9×10 <sup>-4</sup> |
| 17 | 74336545 | rs11077813     | 1>2 | T/C | 0.82 | 1.37 | 1.7×10 <sup>-4</sup> |
| 17 | 75215103 | rs7215278      | 1>2 | G/T | 0.64 | 1.27 | 2.6×10 <sup>-4</sup> |
| 17 | 77831802 | chr17:77831802 | 2>1 | C/T | 0.02 | 2.04 | 6.7×10 <sup>-4</sup> |
| 18 | 5377643  | rs34657168     | 1>2 | T/G | 0.85 | 1.36 | 4.3×10 <sup>-4</sup> |
| 18 | 7127805  | rs9965559      | 1>2 | A/G | 0.17 | 1.42 | 2.7×10 <sup>-5</sup> |
| 18 | 7689006  | rs4121621      | 2>1 | G/A | 0.24 | 1.31 | 1.9×10 <sup>-4</sup> |
| 18 | 11694187 | rs8090294      | 1>2 | G/T | 0.10 | 1.48 | 4.5×10 <sup>-4</sup> |
| 18 | 26291497 | rs16945199     | 2>1 | G/A | 0.87 | 1.43 | 1.1×10 <sup>-4</sup> |

|    |          |                |     |     |      |      |                      |
|----|----------|----------------|-----|-----|------|------|----------------------|
| 18 | 27562746 | rs8097943      | 1>2 | C/T | 0.20 | 1.32 | 5.9×10 <sup>-4</sup> |
| 18 | 32076237 | rs8092794      | 1>2 | A/G | 0.73 | 1.31 | 1.5×10 <sup>-4</sup> |
| 18 | 37496313 | rs138230935    | 2>1 | D/I | 0.15 | 1.34 | 5.8×10 <sup>-4</sup> |
| 18 | 43856724 | rs77784260     | 2>1 | G/A | 0.77 | 1.40 | 4.9×10 <sup>-6</sup> |
| 18 | 45034793 | rs7506616      | 2>1 | T/C | 0.37 | 1.25 | 5.3×10 <sup>-4</sup> |
| 18 | 45059898 | rs12604167     | 2>1 | A/G | 0.76 | 1.28 | 6.0×10 <sup>-4</sup> |
| 18 | 45546445 | rs12955249     | 1>2 | C/T | 0.49 | 1.30 | 3.5×10 <sup>-5</sup> |
| 18 | 60111809 | rs11152345     | 1>2 | C/A | 0.15 | 1.42 | 9.6×10 <sup>-5</sup> |
| 18 | 61540993 | rs184075750    | 2>1 | A/G | 0.94 | 1.60 | 3.6×10 <sup>-4</sup> |
| 18 | 64832417 | rs7235347      | 1>2 | C/T | 0.52 | 1.25 | 5.5×10 <sup>-4</sup> |
| 18 | 69308225 | rs144134528    | 2>1 | D/I | 0.10 | 1.55 | 3.4×10 <sup>-5</sup> |
| 19 | 1027797  | rs7253254      | 1>2 | C/A | 0.15 | 1.38 | 3.4×10 <sup>-4</sup> |
| 19 | 1138540  | rs189976016    | 1>2 | T/C | 0.16 | 1.41 | 6.8×10 <sup>-5</sup> |
| 19 | 10552211 | chr19:10552211 | 2>1 | T/C | 0.96 | 1.82 | 4.0×10 <sup>-4</sup> |
| 19 | 11411889 | chr19:11411889 | 2>1 | G/A | 0.98 | 2.11 | 3.3×10 <sup>-4</sup> |
| 19 | 11558451 | rs111813645    | 2>1 | A/G | 0.95 | 1.69 | 1.2×10 <sup>-4</sup> |
| 19 | 13876841 | chr19:13876841 | 1>2 | C/T | 0.98 | 2.54 | 9.9×10 <sup>-5</sup> |
| 19 | 13949434 | chr19:13949434 | 1>2 | G/A | 0.98 | 2.56 | 8.4×10 <sup>-5</sup> |
| 19 | 15529989 | rs145008437    | 2>1 | G/T | 0.07 | 1.55 | 3.6×10 <sup>-4</sup> |
| 19 | 29790947 | rs79231989     | 2>1 | T/C | 0.65 | 1.27 | 2.7×10 <sup>-4</sup> |
| 19 | 29998033 | rs34950765     | 2>1 | I/D | 0.86 | 1.36 | 6.2×10 <sup>-4</sup> |
| 19 | 30897578 | rs79725917     | 2>1 | C/T | 0.82 | 1.34 | 3.6×10 <sup>-4</sup> |
| 19 | 35757250 | rs916147       | 1>2 | A/G | 0.30 | 1.28 | 2.7×10 <sup>-4</sup> |
| 19 | 40094528 | rs1014206      | 2>1 | G/A | 0.57 | 1.24 | 6.6×10 <sup>-4</sup> |
| 19 | 41172997 | chr19:41172997 | 2>1 | G/C | 0.98 | 2.32 | 3.1×10 <sup>-4</sup> |
| 19 | 42985831 | rs16975834     | 2>1 | G/A | 0.09 | 1.49 | 1.7×10 <sup>-4</sup> |
| 19 | 44953196 | rs73935677     | 2>1 | A/G | 0.90 | 1.43 | 5.9×10 <sup>-4</sup> |
| 19 | 45202027 | rs12150984     | 2>1 | A/G | 0.22 | 1.29 | 6.7×10 <sup>-4</sup> |
| 19 | 45379516 | rs412776       | 2>1 | A/G | 0.18 | 1.33 | 3.8×10 <sup>-4</sup> |
| 19 | 46262673 | chr19:46262673 | 1>2 | A/G | 0.01 | 5.22 | 4.3×10 <sup>-4</sup> |
| 19 | 47774666 | rs138370983    | 1>2 | D/I | 0.36 | 1.26 | 4.3×10 <sup>-4</sup> |

|    |          |               |     |     |      |      |                      |
|----|----------|---------------|-----|-----|------|------|----------------------|
| 19 | 49263886 | rs78627671    | 1>2 | A/G | 0.10 | 1.52 | 5.6×10 <sup>-5</sup> |
| 19 | 53482311 | rs145685675   | 1>2 | I/D | 0.20 | 1.34 | 2.7×10 <sup>-4</sup> |
| 19 | 54333563 | rs71363373    | 1>2 | A/C | 0.20 | 1.32 | 4.6×10 <sup>-4</sup> |
| 20 | 292327   | rs6076049     | 2>1 | C/T | 0.34 | 1.25 | 4.5×10 <sup>-4</sup> |
| 20 | 364747   | rs7265169     | 2>1 | C/A | 0.54 | 1.24 | 6.4×10 <sup>-4</sup> |
| 20 | 550815   | rs2665782     | 2>1 | A/C | 0.57 | 1.26 | 2.3×10 <sup>-4</sup> |
| 20 | 2375262  | rs2076405     | 1>2 | A/G | 0.03 | 1.98 | 2.4×10 <sup>-4</sup> |
| 20 | 3780962  | chr20:3780962 | 2>1 | D/I | 0.01 | 3.94 | 1.6×10 <sup>-4</sup> |
| 20 | 22732845 | rs17827832    | 2>1 | G/T | 0.17 | 1.34 | 4.6×10 <sup>-4</sup> |
| 20 | 44577244 | rs189615511   | 2>1 | C/T | 0.96 | 1.81 | 1.1×10 <sup>-4</sup> |
| 20 | 46410015 | rs6012265     | 1>2 | C/T | 0.24 | 1.36 | 5.3×10 <sup>-5</sup> |
| 20 | 52468966 | rs4811476     | 2>1 | T/C | 0.42 | 1.25 | 3.7×10 <sup>-4</sup> |
| 20 | 57155037 | rs185637455   | 2>1 | C/T | 0.96 | 1.77 | 3.3×10 <sup>-4</sup> |
| 20 | 62772637 | rs2983435     | 1>2 | C/T | 0.54 | 1.25 | 5.3×10 <sup>-4</sup> |
| 21 | 22436984 | rs62207566    | 1>2 | G/A | 0.89 | 1.50 | 7.6×10 <sup>-5</sup> |
| 21 | 25536983 | rs186705241   | 1>2 | C/T | 0.07 | 1.52 | 5.7×10 <sup>-4</sup> |
| 21 | 27397380 | rs149868148   | 2>1 | C/T | 0.07 | 1.53 | 5.0×10 <sup>-4</sup> |
| 21 | 33782887 | rs2211789     | 2>1 | T/C | 0.54 | 1.27 | 1.1×10 <sup>-4</sup> |
| 21 | 34423899 | rs2834078     | 2>1 | T/G | 0.65 | 1.25 | 6.5×10 <sup>-4</sup> |
| 21 | 36469037 | rs984657      | 1>2 | C/T | 0.63 | 1.26 | 4.2×10 <sup>-4</sup> |
| 21 | 39738517 | rs34613855    | 2>1 | A/G | 0.85 | 1.36 | 3.3×10 <sup>-4</sup> |
| 21 | 39788503 | rs2836379     | 2>1 | A/C | 0.91 | 1.48 | 2.9×10 <sup>-4</sup> |
| 21 | 41580503 | rs117371768   | 2>1 | G/A | 0.06 | 1.61 | 3.2×10 <sup>-4</sup> |
| 21 | 41808578 | rs76272754    | 2>1 | T/G | 0.08 | 1.46 | 6.2×10 <sup>-4</sup> |
| 21 | 41877887 | rs7282270     | 2>1 | A/G | 0.18 | 1.31 | 6.1×10 <sup>-4</sup> |
| 21 | 43142343 | rs55711022    | 1>2 | G/C | 0.55 | 1.24 | 6.0×10 <sup>-4</sup> |
| 21 | 43144340 | rs7283002     | 2>1 | C/T | 0.75 | 1.34 | 5.8×10 <sup>-5</sup> |
| 21 | 43530575 | rs220124      | 2>1 | T/C | 0.32 | 1.31 | 5.7×10 <sup>-5</sup> |
| 22 | 17428896 | rs148856575   | 1>2 | T/G | 0.10 | 1.50 | 2.4×10 <sup>-4</sup> |
| 22 | 26469229 | rs9613096     | 2>1 | A/G | 0.77 | 1.30 | 4.6×10 <sup>-4</sup> |
| 22 | 27424318 | rs12483907    | 1>2 | A/G | 0.13 | 1.41 | 3.2×10 <sup>-4</sup> |

|    |           |             |     |     |      |      |                      |
|----|-----------|-------------|-----|-----|------|------|----------------------|
| 22 | 36133739  | rs5001172   | 2>1 | A/G | 0.70 | 1.30 | 8.0×10 <sup>-5</sup> |
| 22 | 39939913  | rs12628516  | 2>1 | A/G | 0.90 | 1.41 | 6.4×10 <sup>-4</sup> |
| 22 | 43006541  | rs182783110 | 2>1 | T/C | 0.08 | 1.54 | 2.0×10 <sup>-4</sup> |
| 22 | 43867177  | rs8142313   | 1>2 | G/C | 0.51 | 1.27 | 2.5×10 <sup>-4</sup> |
| 22 | 46266351  | rs117192130 | 1>2 | A/G | 0.05 | 1.69 | 1.8×10 <sup>-4</sup> |
| 22 | 47372330  | rs4439      | 1>2 | T/C | 0.38 | 1.27 | 4.4×10 <sup>-4</sup> |
| X  | 16675963  | rs6632861   | 2>1 | G/A | 0.73 | 1.22 | 5.7×10 <sup>-4</sup> |
| X  | 19785191  | rs148543908 | 2>1 | G/A | 0.05 | 1.48 | 5.0×10 <sup>-4</sup> |
| X  | 19942966  | rs7060796   | 2>1 | A/G | 0.06 | 1.45 | 3.6×10 <sup>-4</sup> |
| X  | 30119777  | rs6628506   | 1>2 | G/A | 0.54 | 1.21 | 2.3×10 <sup>-4</sup> |
| X  | 32934766  | rs5928113   | 2>1 | A/G | 0.09 | 1.38 | 3.6×10 <sup>-4</sup> |
| X  | 35847989  | rs1536848   | 2>1 | G/A | 0.25 | 1.23 | 3.3×10 <sup>-4</sup> |
| X  | 44226172  | rs5953389   | 2>1 | A/G | 0.40 | 1.23 | 5.5×10 <sup>-5</sup> |
| X  | 84534059  | rs6617041   | 1>2 | A/C | 0.18 | 1.29 | 1.7×10 <sup>-4</sup> |
| X  | 111659846 | rs6643034   | 2>1 | T/C | 0.21 | 1.26 | 2.4×10 <sup>-4</sup> |
| X  | 125060265 | rs5932947   | 2>1 | C/T | 0.66 | 1.20 | 4.6×10 <sup>-4</sup> |
| X  | 125583629 | rs5931011   | 2>1 | G/A | 0.62 | 1.22 | 1.2×10 <sup>-4</sup> |
| X  | 135769607 | rs141122592 | 2>1 | T/C | 0.93 | 1.43 | 2.8×10 <sup>-4</sup> |
| X  | 150396570 | rs760105    | 2>1 | A/G | 0.24 | 1.23 | 5.4×10 <sup>-4</sup> |

<sup>a</sup> Chr is chromosome.

<sup>b</sup> Position is in base pairs (bp) on Genome Reference Consortium Human Build 37.

<sup>c</sup> Subsets represent, which of the two randomly assigned groups is the discovery group (listed before the arrow) or the target group (listed after the arrow). The frequency, OR and p-value is reported for the discovery group.

<sup>d</sup> A1/a2 are the alleles with the effect allele given first.

<sup>e</sup> A1f is the frequency of the effect allele.

<sup>f</sup> OR is reported per copy of the effect allele.



**Table S7. Results of survival, area under the ROC curve (AUC), and net reclassification improvement (NRI) analyses for the adult cohort with DIAGRAM 2018 T2D PS<sup>a</sup>, with the inclusion of lipids traits.**

| Models in Adult Cohort (age ≥ 20 years; N=1936) |                                             |                       |       |                                                     |                       |       | Models in Youth Cohort (age 5-19 years, N=1802) |                      |        |                                                     |                      |        |
|-------------------------------------------------|---------------------------------------------|-----------------------|-------|-----------------------------------------------------|-----------------------|-------|-------------------------------------------------|----------------------|--------|-----------------------------------------------------|----------------------|--------|
|                                                 | Clinical Variables <sup>a</sup> (AUC=0.744) |                       |       | Clinical Variables + PS (AUC=0.751)<br>(ΔAUC=0.007) |                       |       | Clinical Variables (AUC=0.825)                  |                      |        | Clinical Variables + PS (AUC=0.831)<br>(ΔAUC=0.006) |                      |        |
|                                                 | HR (95% CI)                                 | p-value               | NRI   | HR (95% CI)                                         | p-value               | NRI   | HR (95% CI)                                     | p-value              | NRI    | HR (95% CI)                                         | p-value              | NRI    |
| Age (decades)                                   | 1.01 (0.91-1.11)                            | 0.8786                | 0.092 | 1.03 (0.93-1.14)                                    | 0.5270                | 0.105 | 0.86 (0.51-1.45)                                | 0.5709               | -0.078 | 1.00 (0.59-1.70)                                    | 0.9873               | 0.116  |
| Sex (F/M)                                       | 1.16 (0.95-1.42)                            | 0.1456                | 0.098 | 1.16 (0.95-1.41)                                    | 0.1603                | 0.101 | 1.27 (0.89-1.81)                                | 0.1907               | -0.016 | 1.22 (0.86-1.75)                                    | 0.2653               | -0.019 |
| Mother Diabetic/NonDb                           | 1.40 (1.08-1.81)                            | 0.0610                | 0.125 | 1.34 (1.03-1.73)                                    | 0.1840                | 0.081 | 2.39 (1.67-3.43)                                | 8.2×10 <sup>-8</sup> | 0.593  | 2.16 (1.50-3.11)                                    | 1.4×10 <sup>-5</sup> | 0.544  |
| Mother Unknown/NonDb                            | 1.27 (0.97-1.97)                            |                       |       | 1.22 (0.93-1.60)                                    |                       |       | 1.51 (0.85-2.70)                                |                      |        | 1.48 (0.83-2.63)                                    |                      |        |
| Father Diabetic/NonDb                           | 1.29 (0.91-1.83)                            |                       |       | 1.21 (0.85-1.72)                                    |                       |       | 1.92 (1.19-3.12)                                |                      |        | 1.72 (1.06-2.79)                                    |                      |        |
| Father Unknown/NonDb                            | 1.17 (0.86-1.58)                            |                       |       | 1.14 (0.84-1.54)                                    |                       |       | 0.87 (0.59-1.29)                                |                      |        | 0.90 (0.60-1.33)                                    |                      |        |
| BMI (kg/m <sup>2</sup> or ZSD)                  | 1.02 (1.01-1.03)                            | 0.0007                | 0.094 | 1.02 (1.01-1.04)                                    | 0.0001                | 0.143 | 1.44 (1.27-1.67)                                | 3.6×10 <sup>-8</sup> | 0.455  | 1.47 (1.29-1.67)                                    | 1.2×10 <sup>-8</sup> | 0.495  |
| Fasting Glucose (mmol/l)                        | 2.14 (1.76-2.60)                            | 2.6×10 <sup>-14</sup> | 0.219 | 2.07 (1.70-2.53)                                    | 4.3×10 <sup>-13</sup> | 0.170 | 3.24 (2.12-4.94)                                | 5.0×10 <sup>-8</sup> | 0.304  | 2.97 (1.95-4.55)                                    | 4.9×10 <sup>-7</sup> | 0.205  |
| HbA1c (mmol/mol)                                | 1.09 (1.07-1.12)                            | 3.5×10 <sup>-16</sup> | 0.383 | 1.09 (1.07-1.11)                                    | 3.1×10 <sup>-15</sup> | 0.368 | 1.06 (1.01-1.10)                                | 0.0090               | 0.037  | 1.05 (1.01-1.09)                                    | 0.0189               | 0.006  |
| Serum HDL cholesterol (mmol/l)                  | 0.64 (0.45-0.92)                            | 0.0158                | 0.179 | 0.65 (0.45-0.94)                                    | 0.0200                | 0.164 | 0.62 (0.27-1.41)                                | 0.2510               | 0.147  | 0.59 (0.26-1.34)                                    | 0.2052               | 0.147  |
| Serum Triglycerides (mmol/l)                    | 1.00 (0.90-1.11)                            | 0.9831                | 0.020 | 0.97 (0.87-1.08)                                    | 0.5529                | 0.095 | 1.24 (0.97-1.58)                                | 0.0891               | 0.143  | 1.17 (0.91-1.51)                                    | 0.2131               | 0.033  |
| Polygenic Score (SD)                            |                                             |                       |       | 1.25 (1.13-1.38)                                    | 9.1×10 <sup>-6</sup>  | 0.235 |                                                 |                      |        | 1.54 (1.28-1.86)                                    | 5.9×10 <sup>-6</sup> | 0.311  |

<sup>a</sup> The weighted DIAGRAM 2018 PS is the sum of the number of T2D effect alleles multiplied by effect size across the 293 SNPs in the DIAGRAM 2018 PS (Table S4).

<sup>b</sup> HR is expressed per kg/m<sup>2</sup> in the adult cohort and per SD Z-score in the youth group. Results in the adult cohort are based on 450 events in 11,900.5 person-years, and results in the youth cohort are based on 139 events in 12,257.1 person-years

**Table S8. Results of survival, area under the ROC curve (AUC), and net reclassification improvement (NRI) analyses for adult and youth cohorts with DIAGRAM 2018 T2D PS, without inclusion of HbA<sub>1c</sub>.**

| A. Models in Adult Cohort (age ≥ 20 years; N=2783) |                                             |                        |       |                                     |                        |       |                                       |                        |       |                                            |                        |       |
|----------------------------------------------------|---------------------------------------------|------------------------|-------|-------------------------------------|------------------------|-------|---------------------------------------|------------------------|-------|--------------------------------------------|------------------------|-------|
|                                                    | Clinical Variables <sup>a</sup> (AUC=0.715) |                        |       | Clinical Variables + PS (AUC=0.726) |                        |       | Clinical Variables + 2hPG (AUC=0.742) |                        |       | Clinical Variables + 2hPG + PS (AUC=0.750) |                        |       |
|                                                    | HR (95% CI)                                 | p-value                | NRI   | HR (95% CI)                         | p-value                | NRI   | HR (95% CI)                           | p-value                | NRI   | HR (95% CI)                                | p-value                | NRI   |
| Age (decades)                                      | 1.04 (0.97, 1.12)                           | 0.31                   | 0.065 | 1.06 (0.98, 1.14)                   | 0.13                   | 0.065 | 1.01 (0.93, 1.08)                     | 0.89                   | 0.027 | 1.03 (0.95, 1.11)                          | 0.51                   | 0.056 |
| Sex (F/M)                                          | 1.28 (1.11, 1.47)                           | 6.53×10 <sup>-4</sup>  | 0.148 | 1.26 (1.09, 1.45)                   | 1.47×10 <sup>-3</sup>  | 0.147 | 1.09 (0.94, 1.26)                     | 0.24                   | 0.147 | 1.08 (0.93, 1.24)                          | 0.31                   | 0.147 |
| Mother Diabetic/NonDb                              | 1.34 (1.11, 1.61)                           | 4.25×10 <sup>-4</sup>  | 0.171 | 1.29 (1.07, 1.56)                   | 2.24×10 <sup>-3</sup>  | 0.144 | 1.27 (1.05, 1.54)                     | 2.88×10 <sup>-3</sup>  | 0.134 | 1.23 (1.01, 1.48)                          | 9.77×10 <sup>-3</sup>  | 0.145 |
| Mother Unknown/NonDb                               | 1.34 (1.12, 1.61)                           |                        |       | 1.29 (1.07, 1.55)                   |                        |       | 1.27 (1.06, 1.53)                     |                        |       | 1.23 (1.02, 1.48)                          |                        |       |
| Father Diabetic/NonDb                              | 1.45 (1.11, 1.90)                           |                        |       | 1.43 (1.10, 1.87)                   |                        |       | 1.43 (1.10, 1.87)                     |                        |       | 1.42 (1.09, 1.86)                          |                        |       |
| Father Unknown/NonDb                               | 1.22 (0.98, 1.52)                           |                        |       | 1.21 (0.97, 1.50)                   |                        |       | 1.22 (0.98, 1.52)                     |                        |       | 1.21 (1.03, 1.50)                          |                        |       |
| BMI (kg/m <sup>2</sup> )                           | 1.04 (1.03, 1.05)                           | 1.96×10 <sup>-19</sup> | 0.281 | 1.04 (1.03, 1.05)                   | 6.90×10 <sup>-23</sup> | 0.319 | 1.04 (1.03, 1.04)                     | 2.79×10 <sup>-15</sup> | 0.272 | 1.04 (1.03, 1.05)                          | 3.65×10 <sup>-18</sup> | 0.326 |
| Fasting Glucose (mmol/l)                           | 2.53 (2.21, 2.91)                           | 1.21×10 <sup>-40</sup> | 0.487 | 2.43 (2.12, 2.79)                   | 2.03×10 <sup>-37</sup> | 0.474 | 1.76 (1.52, 2.04)                     | 2.71×10 <sup>-14</sup> | 0.269 | 1.71 (1.48, 1.98)                          | 3.86×10 <sup>-13</sup> | 0.262 |
| 2-hour Glucose (mmol/l)                            |                                             |                        |       |                                     |                        |       | 1.36 (1.30, 1.43)                     | 1.10×10 <sup>-35</sup> | 0.418 | 1.35 (1.28, 1.41)                          | 1.69×10 <sup>-33</sup> | 0.417 |
| Polygenic Score (SD)                               |                                             |                        |       | 1.28 (1.19, 1.36)                   | 1.78×10 <sup>-12</sup> | 0.310 |                                       |                        |       | 1.25 (1.16, 1.33)                          | 1.25×10 <sup>-10</sup> | 0.299 |
| B. Models in Youth Cohort (age 5-19 years; N=2943) |                                             |                        |       |                                     |                        |       |                                       |                        |       |                                            |                        |       |
|                                                    | Clinical Variables (AUC=0.771)              |                        |       | Clinical Variables + PS (AUC=0.783) |                        |       | Clinical Variables + 2hPG (AUC=0.787) |                        |       | Clinical Variables + 2hPG + PS (AUC=0.796) |                        |       |
|                                                    | HR (95% CI)                                 | p-value                | NRI   | HR (95% CI)                         | p-value                | NRI   | HR (95% CI)                           | p-value                | NRI   | HR (95% CI)                                | p-value                | NRI   |
| Age (decades)                                      | 1.29 (1.00, 1.05)                           | 0.07                   | 0.171 | 1.39 (1.06, 1.82)                   | 0.02                   | 0.202 | 1.24 (0.94, 1.63)                     | 0.13                   | 0.243 | 1.31 (0.99, 1.73)                          | 0.06                   | 0.254 |
| Sex (F/M)                                          | 1.39 (1.15, 1.69)                           | 8.62×10 <sup>-4</sup>  | 0.236 | 1.39 (1.14, 1.68)                   | 1.10×10 <sup>-3</sup>  | 0.236 | 1.22 (1.00, 1.49)                     | 0.05                   | 0.218 | 1.24 (1.02, 1.51)                          | 0.03                   | 0.233 |
| Mother Diabetic/NonDb                              | 2.10 (1.679, 2.64)                          | 1.33×10 <sup>-12</sup> | 0.458 | 1.95 (1.55, 2.45)                   | 8.32×10 <sup>-10</sup> | 0.396 | 2.15 (1.71, 2.69)                     | 3.92×10 <sup>-13</sup> | 0.433 | 2.00 (1.59, 2.50)                          | 2.12×10 <sup>-10</sup> | 0.410 |
| Mother Unknown/NonDb                               | 1.67 (1.31, 2.11)                           |                        |       | 1.69 (1.33, 2.15)                   |                        |       | 1.67 (1.31, 2.11)                     |                        |       | 1.69 (1.33, 2.14)                          |                        |       |
| Father Diabetic/NonDb                              | 1.73 (1.29, 2.33)                           |                        |       | 1.54 (1.14, 2.07)                   |                        |       | 1.75 (1.30, 2.35)                     |                        |       | 1.57 (1.17, 2.12)                          |                        |       |
| Father Unknown/NonDb                               | 1.24 (1.00, 1.55)                           |                        |       | 1.20 (0.97, 1.50)                   |                        |       | 1.24 (1.00, 1.55)                     |                        |       | 1.20 (0.97, 1.50)                          |                        |       |
| Modified BMI Z-score                               | 1.41 (1.33, 1.50)                           | 2.93×10 <sup>-30</sup> | 0.710 | 1.42 (1.34, 1.50)                   | 8.84×10 <sup>-32</sup> | 0.707 | 1.35 (1.26, 1.43)                     | 5.48×10 <sup>-21</sup> | 0.588 | 1.36 (1.28, 1.45)                          | 3.24×10 <sup>-23</sup> | 0.576 |
| Fasting Glucose (mmol/l)                           | 2.32 (1.79, 3.00)                           | 1.77×10 <sup>-10</sup> | 0.349 | 2.09 (1.61, 2.70)                   | 2.02×10 <sup>-8</sup>  | 0.342 | 1.61 (1.23, 2.11)                     | 5.68×10 <sup>-4</sup>  | 0.108 | 1.51 (1.15, 1.98)                          | 2.69×10 <sup>-3</sup>  | 0.056 |
| 2-hour Glucose (nmol/l)                            |                                             |                        |       |                                     |                        |       | 1.35 (1.25, 1.46)                     | 1.45×10 <sup>-14</sup> | 0.494 | 1.31 (1.21, 1.41)                          | 1.64×10 <sup>-11</sup> | 0.456 |
| Polygenic Score (SD)                               |                                             |                        |       | 1.42 (1.29, 1.57)                   | 7.06×10 <sup>-12</sup> | 0.233 |                                       |                        |       | 1.36 (1.23, 1.51)                          | 2.90×10 <sup>-9</sup>  | 0.188 |

The weighted DIAGRAM 2018 PS is the sum of the number of T2D effect alleles multiplied by effect size across the 293 SNPs in the DIAGRAM 2018 PS (Table S4).

<sup>b</sup>HR is expressed per kg/m<sup>2</sup> in the adult cohort and per SD Z-score in the youth group. Results in the adult cohort are based on 903 events in 25,110 person-years, and results in the youth cohort are based on 447 events in 30,893 person-years

**Table S9. Cox regressions comparing associations of the DIAGRAM 2018 PS (N=293 SNPs) with T2D incidence after adjustment for the first 10 genetic principal components<sup>a</sup>: birth, youth, and adult cohorts.**

| Cohort                             | HR <sup>b</sup> (95% HR CI) for the PS | AUC (and ΔAUC) for clinical model including the PS | NRI for the PS |
|------------------------------------|----------------------------------------|----------------------------------------------------|----------------|
| Birth cohort (N=2894) <sup>c</sup> | 1.43 (1.30, 1.57)                      | 0.673 (0.060)                                      | 0.299          |
| Youth cohort (N=2229) <sup>d</sup> | 1.44 (1.24, 1.67)                      | 0.811 (0.006)                                      | 0.246          |
| Adult cohort (N=2333) <sup>e</sup> | 1.24 (1.14, 1.35)                      | 0.733 (0.005)                                      | 0.231          |

<sup>a</sup> Association assessed with residual T2D PS after adjusting for 1<sup>st</sup> 10 genetic PCs, estimated in each target cohort separately

<sup>b</sup> Only HRs and 95% HR confidence intervals (CIs) for PSs, not for clinical variables, are specified across PSs and cohorts in this table.

<sup>c</sup> Model in birth cohort was adjusted for clinical variables: sex, parental diabetes, and birth weight.

<sup>c</sup> Model in youth cohort was adjusted for clinical variables: age, sex, parental diabetes, modified BMI z score, fasting plasma glucose and Hb<sub>A1c</sub>.

<sup>d</sup> Model in adult cohort was adjusted for clinical variables: age, sex, parental diabetes, BMI, fasting plasma glucose and Hb<sub>A1c</sub>.

**Table S10. Comparing analyses of PS constructions in birth, youth, and adult cohorts.**

Table S10a. Cox regression, AUC, and NRI analyses results: birth cohort (N=2894).

| PS Construction                                         | HR (95% CI) <sup>a,b</sup> | ΔAUC <sup>c</sup> (95% CI) | NRI <sup>d</sup> (95% CI) |
|---------------------------------------------------------|----------------------------|----------------------------|---------------------------|
| AGEN 2020 (125 SNPs)                                    | 1.27 (1.15, 1.39)          | 0.037 (0.013, 0.060)       | 0.164 (0.025, 0.303)      |
| DIAGRAM 2018 (293 SNPs)                                 | 1.48 (1.35, 1.63)          | 0.072 (0.045, 0.099)       | 0.362 (0.222, 0.502)      |
| DIAMANTE 2022 multi-ancestry composite (287 SNPs)       | 1.45 (1.32, 1.60)          | 0.073 (0.046, 0.010)       | 0.259 (0.115, 0.403)      |
| DIAMANTE 2022 multi-ancestry African (276 SNPs)         | 1.28 (1.16, 1.41)          | 0.042 (0.019, 0.065)       | 0.231 (0.091, 0.376)      |
| DIAMANTE 2022 multi-ancestry East Asian (280 SNPs)      | 1.33 (1.22, 1.46)          | 0.052 (0.026, 0.077)       | 0.176 (0.029, 0.323)      |
| DIAMANTE 2022 multi-ancestry European (287 SNPs)        | 1.47 (1.33, 1.62)          | 0.075 (0.048, 0.102)       | 0.328 (0.183, 0.474)      |
| DIAMANTE 2022 multi-ancestry Latino/Hispanic (287 SNPs) | 1.40 (1.28, 1.55)          | 0.072 (0.046, 0.099)       | 0.277 (0.125, 0.428)      |
| DIAMANTE 2022 multi-ancestry South Asian (282 SNPs)     | 1.32 (1.20, 1.45)          | 0.054 (0.031, 0.077)       | 0.201 (0.057, 0.306)      |
| DIAMANTE 2022 population-specific weight (287 SNPs)     | 1.32 (1.20, 1.45)          | 0.057 (0.032, 0.081)       | 0.222 (0.068, 0.376)      |
| Population-specific variant (287 SNPs)                  | 1.41 (1.28, 1.54)          | 0.069 (0.044, 0.093)       | 0.227 (0.088, 0.366)      |

<sup>a</sup> Model in birth cohort was additionally adjusted for clinical variables: sex, parental diabetes, and birth weight.

<sup>b</sup> Only HRs and 95% HR confidence intervals (CIs) for PSs, not for clinical variables, are specified across PSs and cohorts in this table.

<sup>c</sup> ΔAUC is the difference in AUC between the model containing the PS and that containing clinical variables alone, which had AUC=0.614.

<sup>d</sup> NRI is calculated comparing the model with the PS to that containing clinical variables alone.

Table S10b. Cox regression, AUC, and NRI analyses results: youth cohort (N=2229).

| PS Construction                                         | HR (95% CI) <sup>e,f</sup> | ΔAUC <sup>g</sup> (95% CI) | NRI <sup>h</sup> (95% CI) |
|---------------------------------------------------------|----------------------------|----------------------------|---------------------------|
| AGEN 2020 (125 SNPs)                                    | 1.28 (1.12, 1.46)          | 0.005 (-0.003, 0.012)      | 0.331 (0.141, 0.521)      |
| DIAGRAM 2018 (293 SNPs)                                 | 1.49 (1.29, 1.72)          | 0.007 (-0.003, 0.017)      | 0.268 (0.072, 0.464)      |
| DIAMANTE 2022 multi-ancestry composite (287 SNPs)       | 1.34 (1.17, 1.54)          | 0.004 (-0.001, 0.009)      | 0.314 (0.116, 0.512)      |
| DIAMANTE 2022 multi-ancestry African (276 SNPs)         | 1.21 (1.06, 1.38)          | 0.005 (-0.001, 0.010)      | 0.185 (-0.017, 0.388)     |
| DIAMANTE 2022 multi-ancestry East Asian (280 SNPs)      | 1.19 (1.04, 1.36)          | 0.001 (-0.004, 0.007)      | 0.182 (-0.019, 0.383)     |
| DIAMANTE 2022 multi-ancestry European (287 SNPs)        | 1.37 (1.19, 1.58)          | 0.008 (-0.001, 0.017)      | 0.296 (0.090, 0.502)      |
| DIAMANTE 2022 multi-ancestry Latino/Hispanic (287 SNPs) | 1.32 (1.15, 1.51)          | 0.006 (-0.001, 0.014)      | 0.150 (-0.054, 0.354)     |
| DIAMANTE 2022 multi-ancestry South Asian (282 SNPs)     | 1.35 (1.18, 1.56)          | 0.002 (-0.007, 0.012)      | 0.302 (0.089, 0.515)      |
| DIAMANTE 2022 population-specific weight (287 SNPs)     | 1.24 (1.08, 1.41)          | 0.007 (0.000, 0.013)       | 0.345 (0.157, 0.533)      |
| Population-specific variant (287 SNPs)                  | 1.44 (1.26, 1.64)          | 0.017 (0.006, 0.028)       | 0.469 (0.274, 0.663)      |

<sup>e</sup> Only HRs and 95% HR confidence intervals (CIs) for PSs, not for clinical variables, are specified across PSs and cohorts in this table.

<sup>f</sup> Model in youth cohort was additionally adjusted for clinical variables: age, sex, parental diabetes, modified BMI z score, fasting plasma glucose and Hb<sub>A1c</sub>. Only HRs and 95% HR confidence intervals (CIs) for PSs, not for clinical variables, are specified across PSs and cohorts in this table.

<sup>g</sup> ΔAUC is the difference in AUC between the model containing the PS and that containing clinical variables alone, which had AUC=0.805.

<sup>h</sup> NRI is calculated comparing the model with the PS to that containing clinical variables alone.

Table S10c. Cox regression, AUC, and NRI analyses results: adult cohort (N=2333).

| PS Construction                                         | HR (95% CI) <sup>i,j</sup> | ΔAUC <sup>k</sup> (95% CI) | NRI <sup>l</sup> (95% CI) |
|---------------------------------------------------------|----------------------------|----------------------------|---------------------------|
| AGEN 2020 (125 SNPs)                                    | 1.14 (1.06, 1.24)          | 0.001 (-0.003, 0.005)      | 0.115 (-0.014, 0.244)     |
| DIAGRAM 2018 (293 SNPs)                                 | 1.27 (1.17, 1.38)          | 0.007 (0.001, 0.014)       | 0.270 (0.149, 0.392)      |
| DIAMANTE 2022 multi-ancestry composite (287 SNPs)       | 1.20 (1.10, 1.30)          | 0.004 (-0.001, 0.009)      | 0.216 (0.094, 0.338)      |
| DIAMANTE 2022 multi-ancestry African (276 SNPs)         | 1.13 (1.04, 1.22)          | 0.003 (0.000, 0.007)       | 0.181 (0.047, 0.316)      |
| DIAMANTE 2022 multi-ancestry East Asian (280 SNPs)      | 1.13 (1.04, 1.23)          | 0.001 (-0.002, 0.005)      | 0.115 (-0.014, 0.244)     |
| DIAMANTE 2022 multi-ancestry European (287 SNPs)        | 1.21 (1.12, 1.32)          | 0.005 (0.000, 0.011)       | 0.277 (0.156, 0.397)      |
| DIAMANTE 2022 multi-ancestry Latino/Hispanic (287 SNPs) | 1.18 (1.09, 1.29)          | 0.004 (-0.001, 0.008)      | 0.219 (0.097, 0.340)      |
| DIAMANTE 2022 multi-ancestry South Asian (282 SNPs)     | 1.19 (1.09, 1.29)          | 0.004 (-0.001, 0.009)      | 0.181(0.054, 0.308)       |
| DIAMANTE 2022 population-specific weight (287 SNPs)     | 1.14 (1.05, 1.24)          | 0.002 (-0.001, 0.006)      | 0.083 (-0.043, 0.208)     |
| Population-specific variant (287 SNPs)                  | 1.17 (1.09, 1.27)          | 0.002 (-0.003, 0.007)      | 0.108 (-0.011, 0.228)     |

<sup>i</sup> Only HRs and 95% HR confidence intervals (CIs) for PSs, not for clinical variables, are specified across PSs and cohorts in this table.

<sup>j</sup> Model in adult cohort was additionally adjusted for clinical variables: age, sex, parental diabetes, BMI, fasting plasma glucose and Hb<sub>A1c</sub>. Only HRs and 95% HR confidence intervals (CIs) for PSs, not for clinical variables, are specified across PSs and cohorts in this table

<sup>k</sup> ΔAUC is the difference in AUC between the model containing the PS and that containing clinical variables alone, which had AUC=0.728.

<sup>l</sup> NRI is calculated comparing the model with the PS to that containing clinical variables alone.

**Table S11. Cox regressions, AUC and NRI analyses of the multi-ancestry composite DIAMANTE 2022 PS: adult cohort (N=2333).**

|                              | Clinical Variables <sup>a</sup> (AUC=0.728) |                        |                  | Clinical Variables + PS (AUC=0.732) |                        |       | Clinical Variables + 2hPG (AUC=0.760) |                        |        | Clinical Variables + 2hPG + PS (AUC=0.764) |                        |       |
|------------------------------|---------------------------------------------|------------------------|------------------|-------------------------------------|------------------------|-------|---------------------------------------|------------------------|--------|--------------------------------------------|------------------------|-------|
|                              | HR (95% CI)                                 | p-value                | NRI <sup>b</sup> | HR (95% CI)                         | p-value                | NRI   | HR (95% CI)                           | p-value                | NRI    | HR (95% CI)                                | p-value                | NRI   |
| Age (decades)                | 1.01 (0.93, 1.10)                           | 0.869                  | 0.011            | 1.04 (0.95, 1.13)                   | 0.385                  | 0.050 | 1.00 (0.92, 1.09)                     | 0.992                  | -0.045 | 1.03 (0.94, 1.12)                          | 0.531                  | 0.098 |
| Sex (F/M)                    | 1.35 (1.14, 1.59)                           | 5.48×10 <sup>-4</sup>  | 0.115            | 1.31 (1.10, 1.55)                   | 1.83×10 <sup>-3</sup>  | 0.113 | 1.13 (0.953, 1.34)                    | 0.157                  | 0.110  | 1.10 (0.927, 1.31)                         | 0.271                  | 0.096 |
| Mother Diabetic/NonDb        | 1.52 (1.21, 1.90)                           | 2.75×10 <sup>-4</sup>  | 0.161            | 1.51 (1.21, 1.89)                   | 3.12×10 <sup>-4</sup>  | 0.130 | 1.43 (1.14, 1.80)                     | 2.60×10 <sup>-3</sup>  | 0.178  | 1.42 (1.14, 1.78)                          | 2.88×10 <sup>-3</sup>  | 0.116 |
| Mother Unknown/NonDb         | 1.45 (1.15, 1.82)                           |                        |                  | 1.41 (1.12, 1.77)                   |                        |       | 1.39 (1.10, 1.74)                     |                        |        | 1.36 (1.08, 1.71)                          |                        |       |
| Father Diabetic/NonDb        | 1.45 (1.06, 1.96)                           |                        |                  | 1.45 (1.07, 1.97)                   |                        |       | 1.38 (1.02, 1.88)                     |                        |        | 1.40 (1.03, 1.90)                          |                        |       |
| Father Unknown/NonDb         | 1.20 (0.921, 1.56)                          |                        |                  | 1.17 (0.901, 1.52)                  |                        |       | 1.20 (0.925, 1.56)                    |                        |        | 1.18 (0.905, 1.53)                         |                        |       |
| BMI (kg/m <sup>2</sup> )     | 1.02 (1.01, 1.03)                           | 1.22×10 <sup>-4</sup>  | 0.158            | 1.02 (1.01, 1.03)                   | 1.33×10 <sup>-5</sup>  | 0.201 | 1.02 (1.01, 1.03)                     | 2.11×10 <sup>-5</sup>  | 0.242  | 1.03 (1.01, 1.04)                          | 2.94×10 <sup>-6</sup>  | 0.257 |
| Fasting Glucose (mM)         | 1.99 (1.70, 2.33)                           | 2.78×10 <sup>-17</sup> | 0.303            | 1.96 (1.90, 2.78)                   | 3.27×10 <sup>-16</sup> | 0.300 | 1.44 (1.22, 1.71)                     | 2.51×10 <sup>-5</sup>  | 0.176  | 1.44 (1.21, 1.71)                          | 2.90×10 <sup>-5</sup>  | 0.186 |
| HbA <sub>1c</sub> (mmol/mol) | 1.08 (1.06, 1.10)                           | 1.18×10 <sup>-18</sup> | 0.272            | 1.08 (1.06, 1.10)                   | 1.13×10 <sup>-17</sup> | 0.257 | 1.06 (1.05, 1.08)                     | 9.64×10 <sup>-13</sup> | 0.215  | 1.06 (1.05, 1.08)                          | 3.72×10 <sup>-12</sup> | 0.204 |
| 2-hour Glucose (mM)          |                                             |                        |                  |                                     |                        |       | 1.32 (1.25, 1.39)                     | 3.74×10 <sup>-24</sup> | 0.420  | 1.31 (1.24, 1.39)                          | 2.92×10 <sup>-23</sup> | 0.427 |
| Polygenic Score (SD)         |                                             |                        |                  | 1.20 (1.10, 1.30)                   | 2.43×10 <sup>-5</sup>  | 0.216 |                                       |                        |        | 1.17 (1.08, 1.28)                          | 1.85×10 <sup>-4</sup>  | 0.223 |

**Table S12. Cox regressions, AUC and NRI analyses of the population-specific variant PS: adult cohort (N=2333).**

|                              | Clinical Variables (AUC=0.728) |                        |       | Clinical Variables + PS (AUC=0.730) |                        |       | Clinical Variables + 2hPG (AUC=0.760) |                        |        | Clinical Variables + 2hPG + PS (AUC=0.762) |                        |       |
|------------------------------|--------------------------------|------------------------|-------|-------------------------------------|------------------------|-------|---------------------------------------|------------------------|--------|--------------------------------------------|------------------------|-------|
|                              | HR (95% CI)                    | p-value                | NRI   | HR (95% CI)                         | p-value                | NRI   | HR (95% CI)                           | p-value                | NRI    | HR (95% CI)                                | p-value                | NRI   |
| Age (decades)                | 1.01 (0.93, 1.10)              | 0.869                  | 0.011 | 1.03 (0.94, 1.12)                   | 0.543                  | 0.041 | 1.00 (0.92, 1.09)                     | 0.992                  | -0.045 | 1.02 (0.93, 1.11)                          | 0.702                  | 0.084 |
| Sex (F/M)                    | 1.35 (1.14, 1.59)              | 5.48×10 <sup>-4</sup>  | 0.115 | 1.34 (1.13, 1.58)                   | 7.51×10 <sup>-4</sup>  | 0.116 | 1.13 (0.953, 1.34)                    | 0.157                  | 0.110  | 1.14 (0.956, 1.35)                         | 0.149                  | 0.110 |
| Mother Diabetic/NonDb        | 1.52 (1.21, 1.90)              | 2.75×10 <sup>-4</sup>  | 0.161 | 1.47 (1.18, 1.84)                   | 3.48×10 <sup>-3</sup>  | 0.139 | 1.43 (1.14, 1.80)                     | 2.60×10 <sup>-3</sup>  | 0.178  | 1.40 (1.12, 1.76)                          | 0.0142                 | 0.132 |
| Mother Unknown/NonDb         | 1.45 (1.15, 1.82)              |                        |       | 1.42 (1.13, 1.79)                   |                        |       | 1.39 (1.10, 1.74)                     |                        |        | 1.37 (1.09, 1.72)                          |                        |       |
| Father Diabetic/NonDb        | 1.45 (1.06, 1.96)              |                        |       | 1.29 (0.947, 1.77)                  |                        |       | 1.38 (1.02, 1.88)                     |                        |        | 1.27 (0.930, 1.73)                         |                        |       |
| Father Unknown/NonDb         | 1.20 (0.921, 1.56)             |                        |       | 1.12 (0.859, 1.46)                  |                        |       | 1.20 (0.925, 1.56)                    |                        |        | 1.14 (0.872, 1.48)                         |                        |       |
| BMI (kg/m <sup>2</sup> )     | 1.02 (1.01, 1.03)              | 1.22×10 <sup>-4</sup>  | 0.158 | 1.02 (1.01, 1.03)                   | 3.09×10 <sup>-5</sup>  | 0.178 | 1.02 (1.01, 1.03)                     | 2.11×10 <sup>-5</sup>  | 0.242  | 1.02 (1.01, 1.03)                          | 5.05×10 <sup>-6</sup>  | 0.289 |
| Fasting Glucose (mmol/l)     | 1.99 (1.70, 2.33)              | 2.78×10 <sup>-17</sup> | 0.303 | 1.97 (1.68, 2.31)                   | 6.84×10 <sup>-17</sup> | 0.291 | 1.44 (1.22, 1.71)                     | 2.51×10 <sup>-5</sup>  | 0.176  | 1.45 (1.22, 1.71)                          | 2.09×10 <sup>-5</sup>  | 0.191 |
| HbA <sub>1c</sub> (mmol/mol) | 1.08 (1.06, 1.10)              | 1.18×10 <sup>-18</sup> | 0.272 | 1.08 (1.06, 1.10)                   | 8.57×10 <sup>-18</sup> | 0.271 | 1.06 (1.05, 1.08)                     | 3.74×10 <sup>-24</sup> | 0.215  | 1.06 (1.04, 1.08)                          | 5.31×10 <sup>-12</sup> | 0.226 |
| 2-hour Glucose (mmol/l)      |                                |                        |       |                                     |                        |       | 1.32 (1.25, 1.39)                     | 9.64×10 <sup>-13</sup> | 0.420  | 1.31 (1.24, 1.39)                          | 3.34×10 <sup>-23</sup> | 0.419 |
| Polygenic Score (SD)         |                                |                        |       | 1.17 (1.09, 1.27)                   | 7.13×10 <sup>-5</sup>  | 0.108 |                                       |                        |        | 1.15 (1.06, 1.25)                          | 5.93×10 <sup>-4</sup>  | 0.117 |

<sup>a</sup> "Clinical variables" for adult cohort refers to all the following variables: age, sex, parental diabetes, BMI, Hb<sub>A1c</sub> and FPG.

<sup>b</sup> NRI values were calculated for each variable by assessing its contribution to other variables (e.g., clinical variables and/or 2hPG), as specified by column headers

**Table S13. AUC analyses for additional genotypes with DIAGRAM 2018 PS: adult cohort**

Table S13a. AUC analyses for combinations of clinical variables, *ABCC8* rs1272388614 (R1420H) genotype and DIAGRAM 2018 PS, in adult cohort (N=2333).

| Parameters in model                                                                   | AUC   |
|---------------------------------------------------------------------------------------|-------|
| age, sex, <i>ABCC8</i> genotype                                                       | 0.590 |
| age, sex, <i>ABCC8</i> genotype, PS                                                   | 0.620 |
| age, sex, <i>ABCC8</i> genotype, parental diabetes, FPG, HbA <sub>1c</sub>            | 0.728 |
| age, sex, <i>ABCC8</i> genotype, parental diabetes, FPG, HbA <sub>1c</sub> , PS       | 0.735 |
| age, sex, <i>ABCC8</i> genotype, parental diabetes, FPG, 2hPG, HbA <sub>1c</sub>      | 0.760 |
| age, sex, <i>ABCC8</i> genotype, parental diabetes, FPG, 2hPG, HbA <sub>1c</sub> , PS | 0.765 |

Table S13b. AUC analyses for combinations of clinical variables, *KCNQ1* rs2237895 genotype and DIAGRAM 2018 PS, in adult cohort (N=2333).

| Parameters in model                                                                                                                                      | AUC   |
|----------------------------------------------------------------------------------------------------------------------------------------------------------|-------|
| age, sex, maternally-derived <i>KCNQ1</i> risk allele, paternally-derived <i>KCNQ1</i> risk allele                                                       | 0.598 |
| age, sex, maternally-derived <i>KCNQ1</i> risk allele, paternally-derived <i>KCNQ1</i> risk allele, PS                                                   | 0.619 |
| age, sex, maternally-derived <i>KCNQ1</i> risk allele, paternally-derived <i>KCNQ1</i> risk allele, parental diabetes, FPG, HbA <sub>1c</sub>            | 0.723 |
| age, sex, maternally-derived <i>KCNQ1</i> risk allele, paternally-derived <i>KCNQ1</i> risk allele, parental diabetes, FPG, HbA <sub>1c</sub> , PS       | 0.727 |
| age, sex, maternally-derived <i>KCNQ1</i> risk allele, paternally-derived <i>KCNQ1</i> risk allele, parental diabetes, FPG, 2hPG, HbA <sub>1c</sub>      | 0.756 |
| age, sex, maternally-derived <i>KCNQ1</i> risk allele, paternally-derived <i>KCNQ1</i> risk allele, parental diabetes, FPG, 2hPG, HbA <sub>1c</sub> , PS | 0.758 |

Table S13c. AUC analyses for combinations of clinical variables, *ABCC8* rs1272399614 (R1420H), *KCNQ1* rs2237895 genotypes and DIAGRAM 2018 PS, in adult cohort (N=2333).

| Parameters in model                                                                                                                                                                          | AUC   |
|----------------------------------------------------------------------------------------------------------------------------------------------------------------------------------------------|-------|
| age, sex, <i>ABCC8</i> genotype, maternally-derived <i>KCNQ1</i> risk allele, paternally-derived <i>KCNQ1</i> risk allele                                                                    | 0.598 |
| age, sex, <i>ABCC8</i> genotype, maternally-derived <i>KCNQ1</i> risk allele, paternally-derived <i>KCNQ1</i> risk allele, PS                                                                | 0.619 |
| age, sex, <i>ABCC8</i> genotype, maternally-derived <i>KCNQ1</i> risk allele, paternally-derived <i>KCNQ1</i> risk allele, parental diabetes, FPG, HbA <sub>1c</sub> ,                       | 0.730 |
| age, sex, <i>ABCC8</i> genotype, maternally-derived <i>KCNQ1</i> risk allele, paternally-derived <i>KCNQ1</i> risk allele, parental diabetes, FPG, HbA <sub>1c</sub> , PS                    | 0.735 |
| age, sex, <i>ABCC8</i> genotype, maternally-derived <i>KCNQ1</i> risk allele, paternally-derived <i>KCNQ1</i> risk allele, parental diabetes, FPG, 2hPG, HbA <sub>1c</sub>                   | 0.763 |
| age, sex, <i>ABCC8</i> genotype, maternally-derived <i>KCNQ1</i> risk allele, paternally-derived <i>KCNQ1</i> risk allele, parental diabetes, FPG, 2hPG, HbA <sub>1c</sub> , PS <sup>a</sup> | 0.765 |

<sup>a</sup> Net reclassification improvement (NRI) values for each genetic variable in the bottommost row of Table S6c: 0.021 for *ABCC8* genotype, 0.148 for the maternally-derived and paternally-derived *KCNQ1* risk alleles, and 0.250 for the PS.

## Supplementary appendix references

1. Piaggi P, Masindova I, Muller YL, et al. A genome-wide association study using a custom genotyping array identifies variants in GPR158 associated with reduced energy expenditure in American Indians. In: *Diabetes*. Vol 66. American Diabetes Association Inc.; 2017:2284-2295. doi:10.2337/db16-1565
2. Howie BN, Donnelly P, Marchini J. A Flexible and Accurate Genotype Imputation Method for the Next Generation of Genome-Wide Association Studies. Schork NJ, ed. *PLoS Genet*. 2009;5(6):e1000529. doi:10.1371/journal.pgen.1000529
3. Almasy L, Blangero J. Multipoint quantitative-trait linkage analysis in general pedigrees. *Am J Hum Genet*. 1998;62(5):1198-1211. doi:10.1086/301844
4. Browning BL, Browning SR. A fast, powerful method for detecting identity by descent. *Am J Hum Genet*. 2011;88(2):173-182. doi:10.1016/j.ajhg.2011.01.010
5. Haggstrom GW. Logistic Regression and Discriminant Analysis by Ordinary Least Squares. *J Bus Econ Stat*. 1983;1(3):229. doi:10.2307/1391344
6. Scheinost D, Noble S, Horien C, et al. Ten simple rules for predictive modeling of individual differences in neuroimaging. *Neuroimage*. 2019;193:35-45. doi:10.1016/j.neuroimage.2019.02.057
7. Spracklen CN, Horikoshi M, Kim YJ, et al. Identification of type 2 diabetes loci in 433,540 East Asian individuals. *Nature*. 2020;582(7811):240-245. doi:10.1038/s41586-020-2263-3
8. DIAbetes Genetics Replication And Meta-analysis (DIAGRAM) Consortium, Asian Genetic Epidemiology Network Type 2 Diabetes (AGEN-T2D) Consortium, South Asian Type 2 Diabetes (SAT2D) Consortium, et al. Genome-wide trans-ancestry meta-analysis provides insight into the genetic architecture of type 2 diabetes susceptibility. *Nat Genet*. 2014;46(3):234-244. doi:10.1038/ng.2897
9. Mahajan A, Spracklen CN, Zhang W, et al. Multi-ancestry genetic study of type 2 diabetes highlights the power of diverse populations for discovery and translation. *Nat Genet* 2022 545. 2022;54(5):560-572. doi:10.1038/s41588-022-01058-3
